# Supplementary material for: An unprecedented base-promoted domino reaction of methyleneindolinones and N-tosyloxycarbamates for the construction of bispirooxindoles and spiroaziridine oxindoles
Source: Royal Society of Chemistry journal article supplement (doi:10.1039/c5cc03793j), 2015-01-01
Supplement: c5cc03793j1.pdf [file c5cc03793j1.pdf]

## Supporting Information

### **An Unprecedented Base-Promoted Domino Reaction of Methyleneindolinones and N-Tosyloxycarbamates for the Construction of Bisprioxindoles and Spiroaziridine Oxindoles**

Qi-Lin Wang <sup>a,b</sup>, Tian Cai <sup>a,b</sup>, Jing Zhou <sup>a,b</sup>, Fang Tian <sup>a</sup>, Xiao-Ying Xu <sup>a,\*</sup>, Li-Xin Wang <sup>a,\*</sup>

<sup>a</sup> Key Laboratory of Asymmetric Synthesis and Chirotechnology of Sichuan Province, Chengdu  
Institute of Organic Chemistry, Chinese Academy of Sciences, Chengdu 610041, China

<sup>b</sup> University of Chinese Academy of Sciences, Beijing 10049, China

*E-mail: wxioc@cioc.ac.cn ; xuxy@cioc.ac.cn.*

## Table of Contents

|                                                                         |    |
|-------------------------------------------------------------------------|----|
| 1. General methods.....                                                 | 3  |
| 2. Condition optimization for the synthesis of compound <b>3a</b> ..... | 3  |
| 3. Condition optimization for the synthesis of compound <b>4a</b> ..... | 6  |
| 4. Mechanistic studies.....                                             | 8  |
| 5. Experimental data for bispirooxindoles <b>3</b> .....                | 11 |
| 6. Experimental data for compounds <b>4</b> .....                       | 18 |
| 7. Experimental data for compounds <b>5</b> and <b>7</b> .....          | 23 |
| 8. Crystal data for <b>3a</b> and <b>4a</b> .....                       | 24 |
| 9. Selected <sup>1</sup> H NMR and <sup>13</sup> C NMR spectra.....     | 60 |

## 1. General methods

Commercial grade solvent was dried and purified by standard procedures as specified in Purification of Laboratory Chemicals, 4th Ed (Armarego, W. L. F.; Perrin, D. D. Butterworth Heinemann: 1997). NMR spectra were recorded with tetramethylsilane as the internal standard.  $^1\text{H}$  NMR spectra were recorded at 300 MHz, and  $^{13}\text{C}$  NMR spectra were recorded at 75 MHz (Bruker Avance).  $^1\text{H}$  NMR chemical shifts ( $\delta$ ) are reported in ppm relative to tetramethylsilane (TMS) with the solvent signal as the internal standard ( $\text{CDCl}_3$  at 7.26 ppm,  $(\text{CD}_3)_2\text{SO}$  at 2.50 ppm).  $^{13}\text{C}$  NMR chemical shifts are reported in ppm from tetramethylsilane (TMS) with the solvent resonance as the internal standard ( $\text{CDCl}_3$  at 77.00 ppm,  $(\text{CD}_3)_2\text{SO}$  at 39.52 ppm). Data are given as: s (singlet), d (doublet), t (triplet), q (quartet), dd (double of doublet), br (broad) or m (multiplets), coupling constants (Hz) and integration. Flash column chromatography was carried out using silica gel eluting with ethyl acetate and petroleum ether. Highresolution mass spectra were obtained with the Q-TOF-Premier mass spectrometer. Reactions were monitored by TLC and visualized with ultraviolet light. IR spectra were recorded on a ThermoFisherNicolet Avatar 360 FTIR spectrometer on a KBr beamsplitter.

## 2. Condition optimization for the synthesis of compound **3a**

In order to develop an efficient approach for the synthesis of bispirooxindole **3a**, the easily available methyleneindolinone **1a** was chosen to react with N-tosylloxycarbamate **2a** for the condition optimization. We first screened a series of bases. As shown in Table S1,  $\text{Na}_2\text{CO}_3$  was proved to be the best inorganic base (entry 2) and DABCO $\cdot$ 6 $\text{H}_2\text{O}$  was the best organic base (entry 6), respectively. After a combination of  $\text{Na}_2\text{CO}_3$  and DABCO $\cdot$ 6 $\text{H}_2\text{O}$  (1:1), better result was obtained (entry 11) and bispirooxindole **3a** was obtained in 85% yield. Also the loading of DABCO $\cdot$ 6 $\text{H}_2\text{O}$  could be reduced to 0.2 equiv, giving **3a** in 85% yield (entry 12). Thus, the combined base ( $\text{Na}_2\text{CO}_3$  and DABCO $\cdot$ 6 $\text{H}_2\text{O}$  (1:1)) was recommended for further optimization.

**Table S1:** The optimization of bases <sup>a</sup>

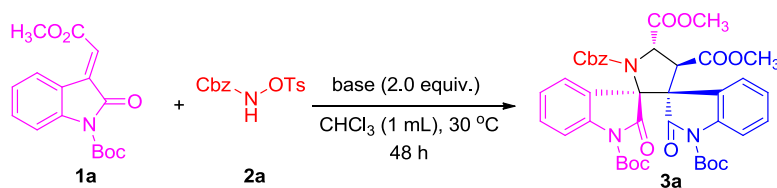

| entry | base                                                                        | time (h) | yield <sup>b</sup> (%) |
|-------|-----------------------------------------------------------------------------|----------|------------------------|
| 1     | NaHCO <sub>3</sub>                                                          | 48       | 41                     |
| 2     | Na <sub>2</sub> CO <sub>3</sub>                                             | 48       | 48                     |
| 3     | K <sub>2</sub> CO <sub>3</sub>                                              | 48       | 35                     |
| 4     | Cs <sub>2</sub> CO <sub>3</sub>                                             | 48       | 47                     |
| 5     | NaOAc                                                                       | 48       | 25                     |
| 6     | DABCO·6H <sub>2</sub> O                                                     | 48       | 67                     |
| 7     | NEt <sub>3</sub>                                                            | 48       | 49                     |
| 8     | pyridine                                                                    | 48       | 27                     |
| 9     | DMAP                                                                        | 48       | 47                     |
| 10    | DBU                                                                         | 48       | 14                     |
| 11    | DABCO·6H <sub>2</sub> O (1.0 eq) + Na <sub>2</sub> CO <sub>3</sub> (1.0 eq) | 48       | 85                     |
| 12    | DABCO·6H <sub>2</sub> O (0.2 eq) + Na <sub>2</sub> CO <sub>3</sub> (1.0 eq) | 48       | 83                     |

<sup>a</sup> Unless otherwise specified, the reaction was conducted on a scale of 0.12 mmol with 1.0 equiv. of **2a** and 2.1 equiv. of **1a**. All reactions afforded **3a** as a single diastereomer. <sup>b</sup> Isolated yield.

Then, the reaction media was investigated and the typical results were shown in Table S2. The reaction proceeded smoothly in aprotic solvents such as halogenated hydrocarbons, ethers, aromatic solvents, and esters (entries 1-10). Also the reaction could take place in protic solvent, and **3a** could be generated in EtOH in 38% yield (entry 11). Among the solvents screened, THF turned out to be the best in terms of the yield of **3a** (entry 3).

**Table S2:** Screening of solvents<sup>a</sup>

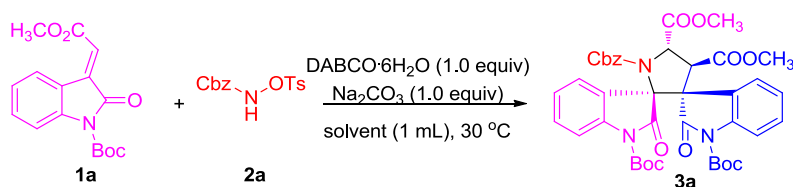

| entry | solvent                         | time (h) | yield <sup>b</sup> (%) |
|-------|---------------------------------|----------|------------------------|
| 1     | CHCl <sub>3</sub>               | 48       | 85                     |
| 2     | CH <sub>2</sub> Cl <sub>2</sub> | 48       | 80                     |
| 3     | THF                             | 24       | 85                     |

|    |                         |    |    |
|----|-------------------------|----|----|
| 4  | MTBE                    | 48 | 83 |
| 5  | toluene                 | 48 | 85 |
| 6  | CH <sub>3</sub> CN      | 8  | 67 |
| 7  | EtOAc                   | 29 | 71 |
| 8  | DMC                     | 29 | 60 |
| 9  | DEC                     | 29 | 66 |
| 10 | <i>n</i> -Butyl acetate | 29 | 67 |
| 11 | EtOH                    | 24 | 38 |

<sup>a</sup> Unless otherwise specified, the reaction was conducted with 0.12 mmol **2a**, 2.1 equiv. **1a**, 2.0 equiv. base in 1 mL CHCl<sub>3</sub> at 30 °C. All reactions afforded **3a** as a single diastereomer. <sup>b</sup> Isolated yield. EA= ethyl acetate, DMC= dimethyl carbonate, DEC=diethyl carbonate.

In order to further optimize the reaction condition, we investigated the effect of the substrate ratios. The substrate ratios had an obvious influence on the reaction efficiency and the results were summarized in Table S3. When the molar ratio of **1a** to **2a** was varied from 2.1:1 to 3.5:1, the yield increased from 85% to 94% (entries 1-7). And no further increase occurred when the molar ratio of **1a** to **2a** was improved to 4.5:1 (entries 7 vs 9-10). By contrast, when excessive **2a** was used, the yields decreased sharply and product **3a** was obtained in only 39% yield when using 1.5 equiv of **2a** and the spirocyclic aziridine **4a** was the major product (entry 11). Thus, a 3.5:1 ratio of **1a** /**2a** was optimal. Notably, when 1.0 equiv of DABCO·6H<sub>2</sub>O was used instead of the combined base, the comparable result was obtained (entries 7 vs 8). Consequently, the following conditions were recommended: 0.12 mmol **2a** and 3.5 equiv of **1a** with 1.0 equiv of DABCO·6H<sub>2</sub>O in 1.0 mL THF at 30 °C.

**Table S3:** Screening of substrate ratios <sup>a</sup>

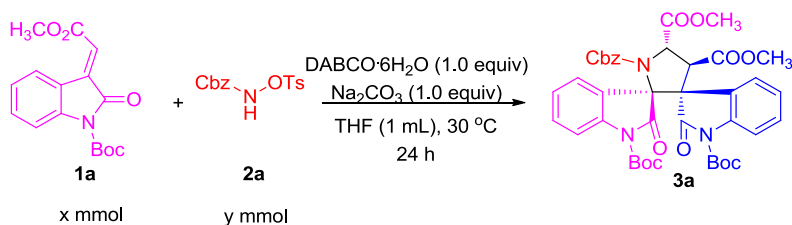

| entry | x     | y    | x/y   | Yield <sup>b</sup> |
|-------|-------|------|-------|--------------------|
| 1     | 0.252 | 0.12 | 2.1:1 | 85                 |
| 2     | 0.264 | 0.12 | 2.2:1 | 79                 |

|                |       |       |       |    |
|----------------|-------|-------|-------|----|
| 3              | 0.288 | 0.12  | 2.4:1 | 84 |
| 4              | 0.300 | 0.12  | 2.5:1 | 89 |
| 5              | 0.360 | 0.12  | 3.0:1 | 93 |
| 6              | 0.420 | 0.12  | 3.5:1 | 94 |
| 7 <sup>c</sup> | 0.420 | 0.12  | 3.5:1 | 92 |
| 8              | 0.480 | 0.12  | 4.0:1 | 90 |
| 9              | 0.540 | 0.12  | 4.5:1 | 87 |
| 10             | 0.240 | 0.144 | 1:1.2 | 71 |
| 11             | 0.240 | 0.18  | 1:1.5 | 39 |

<sup>a</sup> Unless otherwise specified, the reaction was conducted on a 0.12 mmol scale. All reactions afforded **3a** as a single diastereomer. <sup>b</sup> Isolated yield. <sup>c</sup> Only 1.0 equiv of DABCO·6H<sub>2</sub>O used instead of the combined base.

### 3. Condition optimization for the synthesis of compound **4a**

During the screening of substrate ratios for the synthesis of bispirooxindole **3a**, we found that excess **2a** could result in the formation of spirocyclic aziridine **4a** which is a class of unique and versatile synthon. In order to develop a more general and robust approach for the synthesis of spirocyclic aziridines, we examined the condition parameters such as substrate ratios and reaction temperatures (Table S4). When using a 1:2.5 ratio of **1a/2a**, spirocyclic aziridine **4a** could be obtained in 60% yield (entry 1) and no further improvement took place by a 1:3 ratio of **1a/2a** (entry 2). Therefore, a 1:2.5 ratio of **1a/2a** was chosen for further investigation. Temperatures also affected the reaction. Lowering the reaction temperature resulted in lower yields and prolonged reaction time (entries 1 vs 3-4). By contrast, product **4a** could be obtained in 72% yield when the reaction was conducted at 50 °C (entry 5).

Based on the above screenings, the optimal condition was determined as the following: 0.15 mmol **1a** and 2.5 equiv of **2a** with 1.0 equiv of DABCO·6H<sub>2</sub>O in 1.0 mL THF at 50 °C.

**Table S4:** Optimizations of the aziridination of methyleneindolinones<sup>a</sup>.

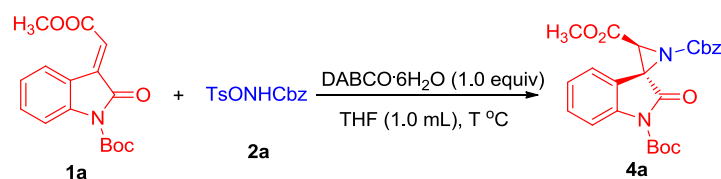

| entry | <b>1a/2a</b> | T (°C) | time | yield <sup>b</sup> (%) |
|-------|--------------|--------|------|------------------------|
|-------|--------------|--------|------|------------------------|

|   |       |     |        |    |
|---|-------|-----|--------|----|
| 1 | 1:2.5 | 30  | 45 min | 60 |
| 2 | 1:3   | 30  | 45 min | 56 |
| 3 | 1:2.5 | -5  | 7 h    | 24 |
| 4 | 1:2.5 | -30 | 12 h   | 21 |
| 5 | 1:2.5 | 50  | 10 min | 72 |

<sup>a</sup> Unless otherwise specified, the reaction was conducted on a scale of 0.15 mmol. All cases afforded **4a** as a single diastereomer. <sup>b</sup> Isolated yield.

**Table S5.** Scope of substrates for synthesis of aziridines <sup>a,b</sup>

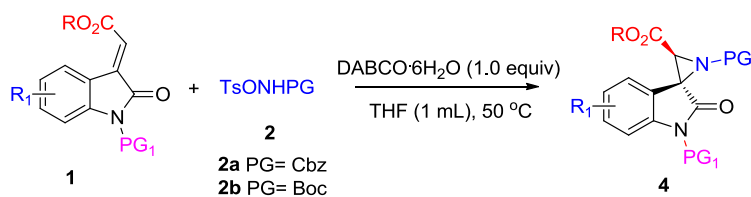

| entry | <b>1</b>  | R <sub>1</sub> | PG <sub>1</sub>    | R            | <b>2</b>  | time   | <b>4</b> /yield <sup>b</sup> (%) |
|-------|-----------|----------------|--------------------|--------------|-----------|--------|----------------------------------|
| 1     | <b>1a</b> | H              | Boc                | Me           | <b>2a</b> | 10 min | <b>4a</b> /72                    |
| 2     | <b>1a</b> | H              | Boc                | Me           | <b>2b</b> | 10 min | <b>4b</b> /55                    |
| 3     | <b>1b</b> | H              | Boc                | Et           | <b>2a</b> | 10 min | <b>4c</b> /77                    |
| 4     | <b>1b</b> | H              | Boc                | Et           | <b>2b</b> | 20 min | <b>4d</b> /58                    |
| 5     | <b>1c</b> | H              | Boc                | <i>t</i> -Bu | <b>2a</b> | 3 h    | <b>4e</b> /70                    |
| 6     | <b>1c</b> | H              | Boc                | <i>t</i> -Bu | <b>2b</b> | 12 h   | <b>4f</b> /59                    |
| 7     | <b>1d</b> | H              | CO <sub>2</sub> Et | Me           | <b>2a</b> | 5 min  | <b>4g</b> /59                    |
| 8     | <b>1e</b> | H              | Cbz                | Me           | <b>2a</b> | 5 min  | <b>4h</b> /72                    |
| 9     | <b>1g</b> | 5-F            | Boc                | Me           | <b>2a</b> | 5 min  | <b>4i</b> /81                    |
| 10    | <b>1g</b> | 5-F            | Boc                | Me           | <b>2b</b> | 5 min  | <b>4j</b> /91                    |
| 11    | <b>1h</b> | 5-Cl           | Boc                | Me           | <b>2a</b> | 5 min  | <b>4k</b> /80                    |
| 12    | <b>1h</b> | 5-Cl           | Boc                | Me           | <b>2b</b> | 5 min  | <b>4l</b> /79                    |
| 13    | <b>1i</b> | 5-Br           | Boc                | Me           | <b>2a</b> | 5 min  | <b>4m</b> /65                    |
| 14    | <b>1i</b> | 5-Br           | Boc                | Me           | <b>2b</b> | 5 min  | <b>4n</b> /63                    |
| 15    | <b>1j</b> | 5-Me           | Boc                | Me           | <b>2a</b> | 10 min | <b>4o</b> /55                    |
| 16    | <b>1k</b> | 7-Cl           | Boc                | Me           | <b>2a</b> | 5 min  | <b>4p</b> /65                    |

<sup>a</sup> Unless otherwise specified, the reaction was conducted on a scale of 0.15 mmol. <sup>b</sup> Isolated yield.

With the optimized condition in hand, the generality of this transformation was next

investigated and the results were shown in Table S5. This domino reaction had a wide tolerance of methyleneindolinones and all the cases could afford the desired products (**4a-o**) in moderate to good yields (58-91%). Increasing the bulkiness of the ester group had minimal impact on the yields, albeit with longer reaction time (Table S5, entries 1-6). Then, the influence of the N-protecting groups, the positions or the electronic nature of the substitution patterns on the methyleneindolinones **1** was studied. And the results revealed that they had some effect on the yields (Table S5, entries 7-16), especially the electronic nature. Substrates with electron-donating substituents gave lower yields than those with electron-withdrawing ones (Table S5, entries 15 vs 9-14).

#### 4. Mechanistic studies

Based on the experimental data and the important roles of tertiary amines played in MBH reaction, a reaction mechanism has been proposed (Scheme S1). First, spirocyclic aziridine **4a** was obtained via a Michael/S<sub>N</sub>2 sequence by reaction of compounds **1a** and **2a**. Then, ring-opening reaction of aziridine **4a** occurred after the attack by DABCO·6H<sub>2</sub>O, and the corresponding zwitterionic intermediate **I** was obtained. Subsequently, intermediate **I** reacted with methyleneindolinone **1a** to form zwitterionic intermediate **II**. Finally, the annulation product **3a** was obtained through an intramolecular nucleophilic substitution and the tertiary amine was released.



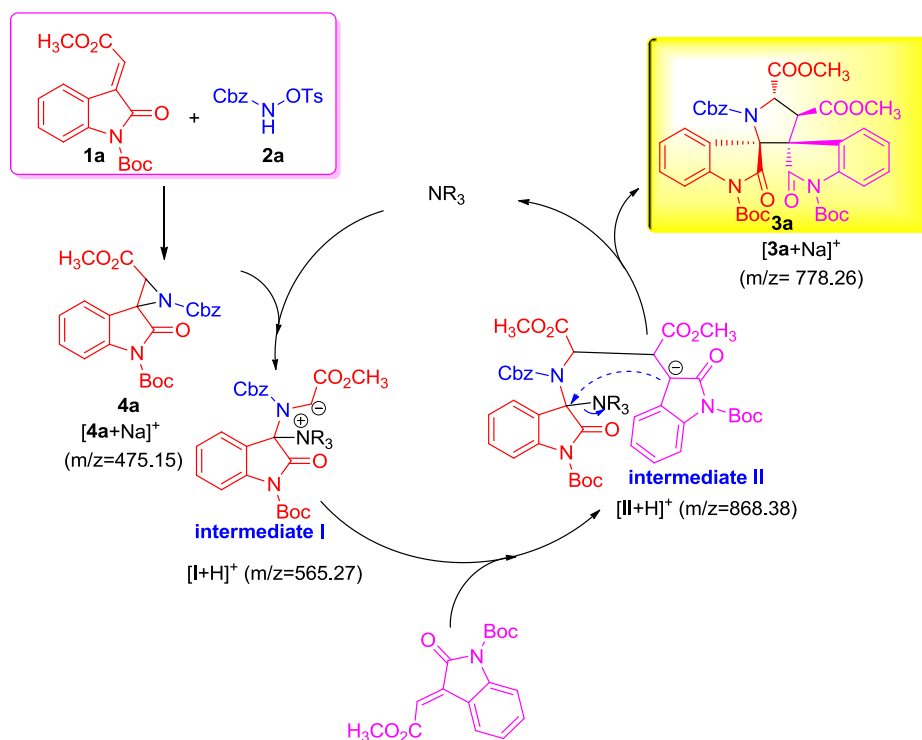

**Scheme S1:** A plausible catalytic cycle for this domino reaction

To get support for the proposed catalytic cycle, both ESI-HRMS analysis and control experiments were conducted, and the results were discussed below.

First, the formation of the spirocyclic aziridine **4a** and zwitterionic intermediates **I** and **II** was supported by ESI-HRMS. Three typical spectrums obtained after blending **1a**, **2a** and DABCO·6H<sub>2</sub>O for 2 minutes were shown in Scheme S2 and Figure S1. A characteristic signal at  $m/z$  475.15 was observed which was consistent with spirocyclic aziridine **4a**, and  $[I+H]^+$  at 565.27 as well as  $[II+H]^+$  at 565.27 (A, Figure S1). However, after stirred for 25 hours, the signal at  $m/z$  475.15 and 629.21 disappeared as expected and the signal of product **3a** at  $m/z$  778.26 became stronger (B, Figure S1). These observations indicated that the reaction proceeded in a stepwise mechanism.

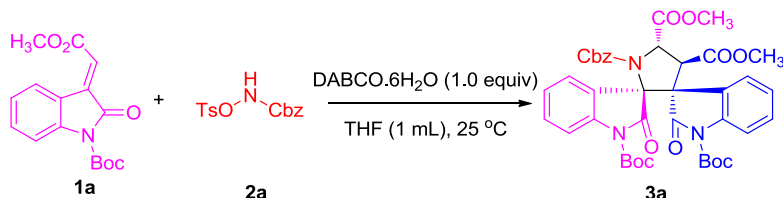

**Scheme S2:** The reaction for HRMS analysis

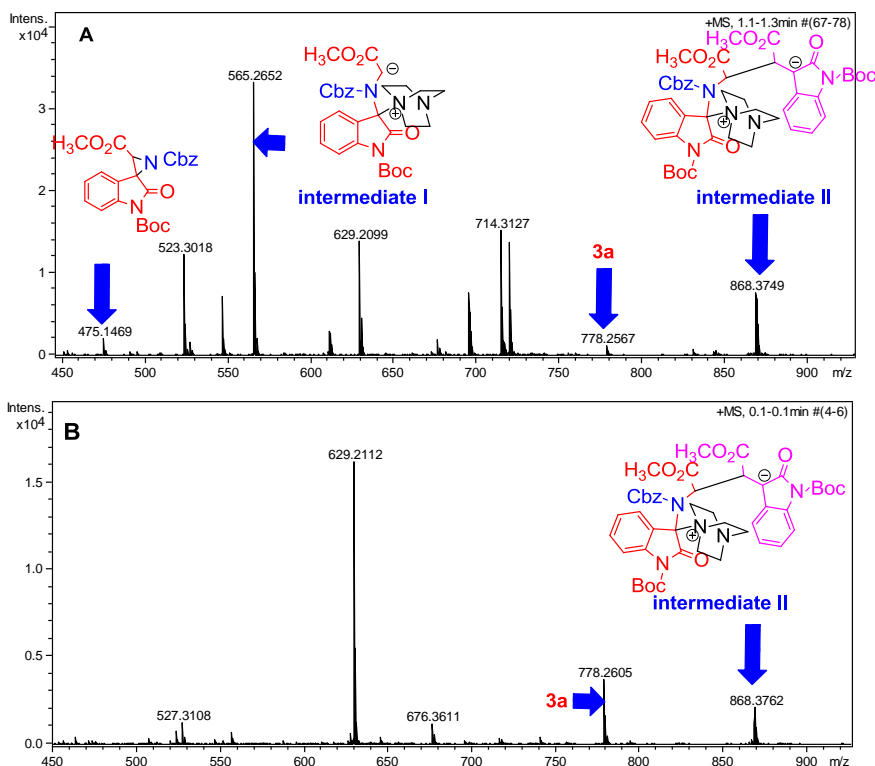

**Figure S1:** A) ESI-HRMS spectrum of the reaction of **1a**, **2a** and DABCO·6H<sub>2</sub>O in 1.0 mL of THF after 2 minutes; B) ESI-HRMS spectrum of the reaction of **1a**, **2a** and DABCO·6H<sub>2</sub>O in 1.0 mL of THF after 25 hours.

In addition, the intermediates **I** and **II** could also be detected by mixing **4a**, **1a** and DABCO·6H<sub>2</sub>O (Figure S2). It is noteworthy that the tertiary amine played an important role in the reaction (Scheme S3). When the mixture of **4a** (0.1 mmol), **1a** (0.25 mmol) and DABCO·6H<sub>2</sub>O (0.1 mmol) was stirred at 25 °C for 48 h, product **3a** was obtained in 97% yield. However, no reaction occurred without DABCO·6H<sub>2</sub>O. Moreover, the reaction could be promoted by a catalytic loading of DABCO·6H<sub>2</sub>O and **3a** was generated in 94% yield.

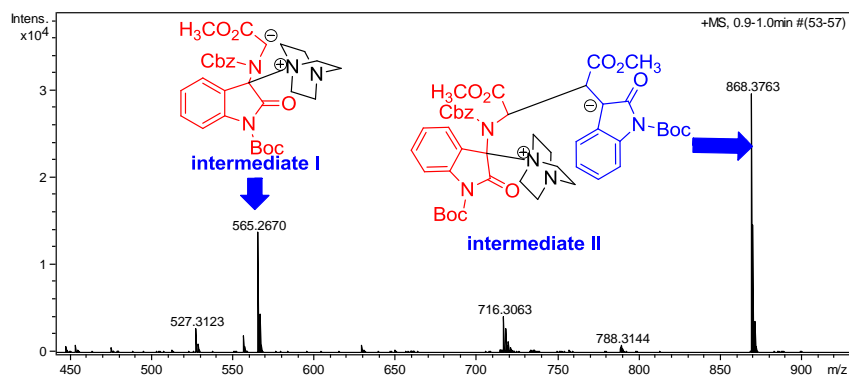

**Figure S2:** ESI-HRMS spectrum of the reaction of **1a**, **4a** and DABCO·6H<sub>2</sub>O in 1.0 mL of THF

after 2.5 h

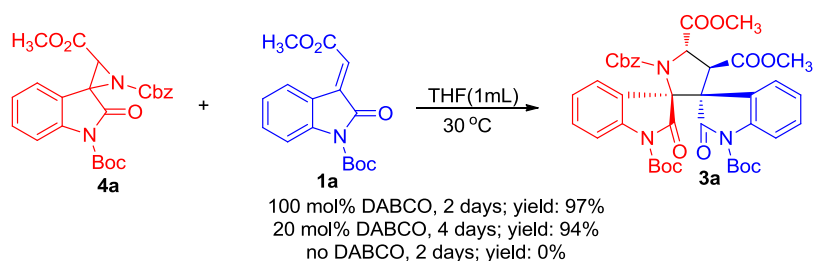

**Scheme S3:** Examination of the role played by the tertiary amine

## 5. Experimental data for bispirooxindoles **3**

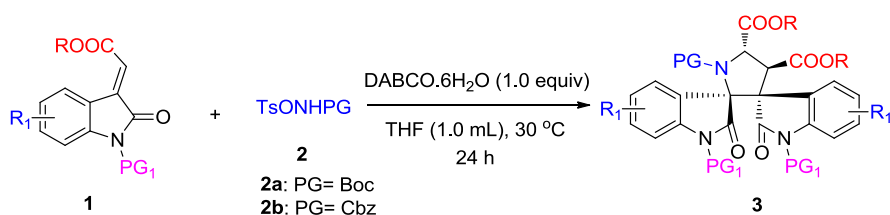

**General procedure:** To a 5.0 mL vial were successively added methyleneindolinones **1** (0.42 mmol), N-tosylloxycarbamates **2** (0.12 mmol), DABCO·6H<sub>2</sub>O (26.4 mg, 0.12 mmol) and 1.0 mL THF. The resulting mixture was stirred for 24-48 h at 30 °C till almost full consumption of **2** by TLC analysis, and then the reaction mixture was directly subjected to flash column chromatography on silica gel (petroleum ether/ ethyl acetate) to afford the corresponding products

**3.**

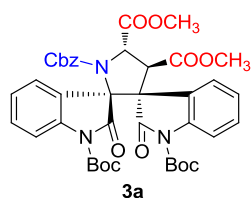

Product **3a** was obtained in 92% yield as a white solid. <sup>1</sup>H NMR (300 MHz, CDCl<sub>3</sub>), δ 7.83 (d, *J* = 5.4 Hz, 1H), 7.74 (d, *J* = 7.8 Hz, 1H), 7.55 (s, 1H), 7.31-7.10 (m, 9H), 6.68 (s, 1H), 5.48 (d, *J* = 5.8 Hz, 1H), 5.10-4.86

(m, 2H), 4.25 (d, *J* = 8.0 Hz, 1H), 3.75 (d, *J* = 104.4 Hz, 3H), 3.41 (s, 3H), 1.44 (s, 9H), 1.38 (s, 9H); <sup>13</sup>C NMR (75 MHz, CDCl<sub>3</sub>) δ 171.2, 170.5, 167.4, 152.6, 148.2, 139.1, 129.9, 128.3, 126.7, 126.2, 124.3, 123.9, 122.3, 114.5, 84.4, 83.7, 68.3, 62.0, 52.8, 52.4, 28.0, 27.7. IR (KBr) ν 3435.9, 2980.9, 2954.3, 2918.6, 1805.7, 1779.4, 1731.5, 1608.1, 1481.0, 1468.8, 1346.4, 1294.3, 1250.6, 1153.6, 1097.8, 761.1 cm<sup>-1</sup>. HRMS (ESI) Calcd. for C<sub>40</sub>H<sub>41</sub>N<sub>3</sub>NaO<sub>12</sub> [M+Na]<sup>+</sup>: 778.2582, Found: 778.2553.

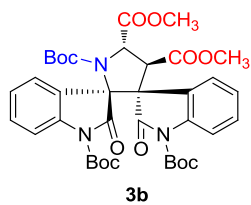

Product **3b** was obtained in 96% yield as a white solid. <sup>1</sup>H NMR (300 MHz, CDCl<sub>3</sub>) δ 7.92 (s, 1H), 7.76 (d, *J* = 8.3 Hz, 1H), 7.69 (s, 1H), 7.30 (t, *J* = 6.5 Hz, 3H), 7.23-7.16 (m, 2H), 5.37 (d, *J* = 8.8 Hz, 1H), 4.27 (d, *J* = 8.8 Hz, 1H), 3.92 (s, 3H), 3.38 (s, 3H), 1.44 (s, 9H), 1.40 (s, 11H), 1.04 (s, 7H); <sup>13</sup>C NMR (75 MHz, CDCl<sub>3</sub>) δ 171.6, 170.2, 167.4, 151.6, 148.4, 148.2, 139.0, 138.1, 129.7, 129.6, 129.4, 126.6, 126.2, 124.2, 123.8, 122.8, 114.5, 114.3, 114.0, 84.2, 83.7, 82.5, 61.6, 52.9, 52.3, 52.2, 52.1, 51.8, 28.0, 27.9, 27.8. IR (KBr) ν 3434.6, 2978.1, 2917.9, 1779.2, 1752.9, 1731.0, 1714.8, 1370.1, 1349.7, 1294.0, 1249.2, 1152.4, 1099.3, 765.8. HRMS (ESI) Calcd. for C<sub>37</sub>H<sub>43</sub>N<sub>3</sub>NaO<sub>12</sub> [M+Na]<sup>+</sup>: 744.2739, Found: 744.2719.

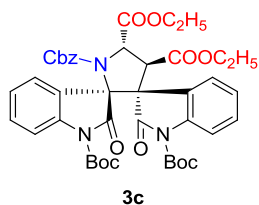

Product **3c** was obtained in 91% yield as a white solid. <sup>1</sup>H NMR (300 MHz, CDCl<sub>3</sub>) δ 7.94 (s, 1H), 7.68 (dd, *J*<sub>1</sub> = 8.0 Hz, *J*<sub>2</sub> = 7.4 Hz, 2H), 7.41-7.00 (m, 9H), 6.67 (s, 1H), 5.39 (d, *J* = 9.0 Hz, 1H), 5.07-4.80 (m, 2H), 4.38 (brs, 1H), 4.29 (d, *J* = 9.0 Hz, 1H), 4.10 (brs, 1H), 3.96-3.85 (m, 1H), 3.82-3.76 (m, 1H), 1.46-1.12 (m, 21H), 0.74 (t, *J* = 7.0 Hz, 3H); <sup>13</sup>C NMR (75 MHz, CDCl<sub>3</sub>) δ 170.8, 169.8, 166.6, 152.4, 148.3, 148.2, 139.1, 137.9, 135.1, 130.1, 129.7, 128.2, 127.2, 126.8, 126.3, 124.2, 123.8, 122.8, 114.4, 84.2, 83.6, 68.1, 62.0, 61.5, 52.5, 51.7, 28.0, 27.9, 13.9, 13.2. IR (KBr) ν 3439.2, 2981.5, 2920.0, 1779.4, 1732.1, 1720.9, 1346.6, 1293.6, 1249.4, 1153.4, 765.0, 752.9. HRMS (ESI) Calcd. for C<sub>42</sub>H<sub>45</sub>N<sub>3</sub>NaO<sub>12</sub> [M+Na]<sup>+</sup>: 806.2895, Found: 806.2897.

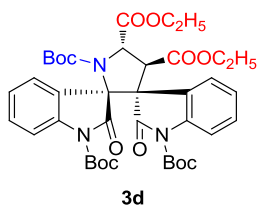

Product **3d** was obtained in 98% yield as a white solid. <sup>1</sup>H NMR (300 MHz, CDCl<sub>3</sub>) δ 8.03 (d, *J* = 6.2 Hz, 1H), 7.73 (dd, *J*<sub>1</sub> = 8.0 Hz, *J*<sub>2</sub> = 7.4 Hz, 2H), 7.38-7.13 (m, 5H), 5.31 (d, *J* = 9.3 Hz, 1H), 4.42-4.35 (m, 2H), 4.29 (d, *J* = 6.2 Hz, 1H), 3.94-3.89 (m, 1H), 3.80-3.74 (m, 1H), 1.44 (s, 9H), 1.39 (s, 15H), 1.03 (s, 6H), 0.72 (s, 3H); <sup>13</sup>C NMR (75 MHz, CDCl<sub>3</sub>) δ 171.0, 169.8, 166.6, 151.5, 148.4, 148.4, 139.0, 138.0, 129.6, 129.5, 126.8, 126.5, 124.1, 123.8, 123.2, 114.3, 114.0, 84.1, 83.6, 82.4, 61.9, 61.6, 61.4, 53.3, 52.0, 28.0, 27.7, 27.5, 14.0, 13.2. IR (KBr) ν 3441.4, 2981.1, 2933.1, 1781.7, 1735.3, 1713.4, 1369.1, 1349.3, 1294.4, 1249.4, 754.5. HRMS (ESI) Calcd. for C<sub>39</sub>H<sub>47</sub>N<sub>3</sub>NaO<sub>12</sub> [M+Na]<sup>+</sup>: 872.3052, Found: 772.3039.

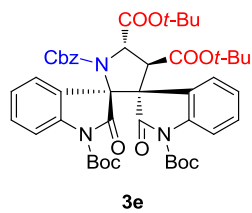

Product **3e** was obtained in 80% yield as a white solid.  $^1\text{H}$  NMR (300 MHz,  $\text{CDCl}_3$ ),  $\delta$  8.04 (dd,  $J_1 = J_2 = 7.2$  Hz, 1H), 7.82-6.63 (m, 2H), 7.42 (d,  $J = 7.5$  Hz, 1H), 7.33-7.05 (m, 8H), 6.67 (d,  $J = 6.7$  Hz, 1H), 5.20 (d,  $J = 7.9$  Hz, 1H), 5.18-4.23 (m, 2H), 4.21 (d,  $J = 9.6$  Hz, 1H), 1.54-1.25 (m, 27H), 0.96 (s, 9H);  $^{13}\text{C}$  NMR (75 MHz,  $\text{CDCl}_3$ )  $\delta$  169.9, 169.6, 169.3, 165.1, 152.3, 148.6, 138.9, 138.1, 129.7, 129.6, 128.4, 128.1, 127.6, 127.1, 126.7, 126.5, 126.2, 124.1, 123.8, 123.5, 114.6, 114.3, 84.0, 83.4, 82.7, 68.2, 67.8, 62.5, 62.4, 61.6, 53.7, 52.6, 27.9, 27.7, 27.0, 26.7. IR (KBr)  $\nu$  3438.2, 2980.1, 2930.2, 1781.2, 1732.6, 1719.7, 1369.1, 1352.4, 1295.4, 1250.1, 1153.8, 1099.0, 844.2, 751.9. HRMS (ESI) Calcd. for  $\text{C}_{46}\text{H}_{53}\text{N}_3\text{NaO}_{12}$   $[\text{M}+\text{Na}]^+$ : 862.3521, Found: 862.3498.

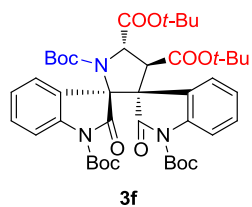

Product **3f** was obtained in 74% yield as a white solid.  $^1\text{H}$  NMR (300 MHz,  $\text{CDCl}_3$ ),  $\delta$  8.04 (dd,  $J_1 = 7.3$  Hz,  $J_2 = 6.9$  Hz, 1H), 7.80-1.68 (m, 2H), 7.42 (t,  $J = 7.6$  Hz, 1H), 7.33-7.14 (m, 4H), 5.12 (t,  $J = 13.6$  Hz, 1H), 4.17 (dd,  $J_1 = 10.2$  Hz,  $J_2 = 9.8$  Hz, 1H), 1.56 (s, 9H), 1.38 (t,  $J = 10.7$  Hz, 21H), 1.04 (s, 6H), 0.96 (s, 9H);  $^{13}\text{C}$  NMR (75 MHz,  $\text{CDCl}_3$ )  $\delta$  170.3, 169.7, 169.4, 165.2, 151.4, 148.6, 138.9, 137.7, 129.5, 129.4, 127.1, 126.8, 126.2, 125.9, 123.9, 123.8, 114.7, 114.1, 113.9, 84.0, 83.6, 82.6, 82.5, 62.3, 62.1, 61.7, 53.4, 52.9, 28.2, 27.9, 27.7, 27.5, 27.1. IR (KBr)  $\nu$  3439.7, 2979.3, 2929.9, 1780.3, 1735.1, 1715.3, 1480.1, 1369.6, 1351.5, 1295.3, 1250.5, 1154.0, 1099.1, 844.7, 751.7. HRMS (ESI) Calcd. for  $\text{C}_{43}\text{H}_{55}\text{N}_3\text{NaO}_{12}$   $[\text{M}+\text{Na}]^+$ : 828.3678, Found: 828.3660.

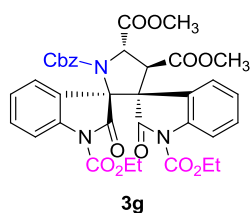

Product **3g** was obtained in 94% yield as a white solid.  $^1\text{H}$  NMR (300 MHz,  $\text{CDCl}_3$ ),  $\delta$  7.86 (d,  $J = 6.4$  Hz, 1H), 7.68 (dd,  $J_1 = 8.2$  Hz,  $J_2 = 26.2$  Hz, 2H), 7.43-7.10 (m, 9H), 6.68 (d,  $J = 6.3$  Hz, 1H), 5.49 (d,  $J = 6.7$  Hz, 1H), 5.09-4.83 (m, 2H), 4.35-4.13 (m, 5H), 3.95-3.61 (m, 3H), 3.43 (s, 3H), 1.36-1.21 (m, 6H);  $^{13}\text{C}$  NMR (75 MHz,  $\text{CDCl}_3$ )  $\delta$  171.1, 167.3, 152.7, 149.8, 138.9, 130.2, 128.2, 127.7, 127.0, 126.5, 124.6, 124.1, 121.7, 114.7, 68.4, 63.5, 63.0, 61.7, 58.4, 52.9, 52.5, 18.4, 14.1. IR (KBr)  $\nu$  3440.5, 2955.3, 2922.8, 2851.2, 1778.6, 1737.7, 1371.3, 1342.7, 1289.2, 1236.6, 1174.4, 756.4, 699.0. HRMS (ESI) Calcd. for  $\text{C}_{36}\text{H}_{33}\text{N}_3\text{NaO}_{12}$   $[\text{M}+\text{Na}]^+$ : 722.1956, Found: 722.1935.

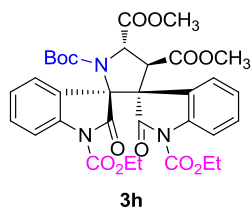

Product **3h** was obtained in 98% yield as a white solid. <sup>1</sup>H NMR (300 MHz, CDCl<sub>3</sub>), δ 7.96 (s, 1H), 7.73 (dd, *J*<sub>1</sub>= 8.1 Hz, *J*<sub>2</sub>= 8.0 Hz, 2H), 7.33-7.14 (m, 5H), 5.36 (d, *J*= 8.6 Hz, 1H), 4.33-4.21 (m, 5H), 3.91 (s, 3H), 3.37 (s, 3H), 1.29-1.20 (m, 9H), 1.01 (s, 6H); <sup>13</sup>C NMR (75 MHz, CDCl<sub>3</sub>) δ 171.4, 170.1, 167.2, 151.5, 150.0, 149.9, 138.6, 137.9, 130.0, 129.9, 126.8, 126.5, 125.8, 124.5, 124.1, 122.2, 115.1, 114.6, 114.3, 82.7, 63.4, 63.3, 63.0, 61.3, 58.3, 52.9, 52.4, 52.3, 27.4, 18.3, 14.0. IR (KBr) ν 3445.9, 2979.3, 2924.1, 1805.9, 1781.6, 1737.4, 1708.9, 1370.5, 1345.4, 1291.4, 1237.8, 1170.9, 767.3. HRMS (ESI) Calcd. for C<sub>33</sub>H<sub>35</sub>N<sub>3</sub>NaO<sub>12</sub> [M+Na]<sup>+</sup>: 688.2113, Found: 688.2093.

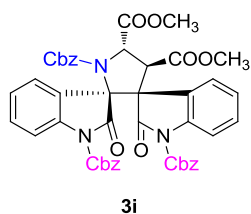

Product **3i** was obtained in 93% yield as a white solid. <sup>1</sup>H NMR (300 MHz, CDCl<sub>3</sub>), δ 7.84 (s, 1H), 7.68 (d, *J*= 8.1 Hz, 1H), 7.36-6.98 (m, 20 H), 6.69-6.63 (m, 1H), 5.50 (d, *J*= 9.1 Hz, 1H), 5.53-4.79 (m, 6H), 4.26 (d, *J*= 7.8 Hz, 1H), 3.98-3.59 (m, 3H), 3.40 (s, 3H); <sup>13</sup>C NMR (75 MHz, CDCl<sub>3</sub>) δ 171.1, 167.2, 152.6, 149.7, 138.6, 134.8, 134.7, 130.3, 128.7, 128.5, 128.4, 128.3, 128.2, 128.0, 127.8, 127.7, 126.9, 126.4, 124.7, 124.2, 121.6, 114.7, 68.5, 68.4, 68.2, 68.1, 61.8, 52.9, 52.7, 52.6, 52.5. IR (KBr) ν 3436.8, 3033.6, 2954.2, 1779.1, 1741.0, 1382.0, 1343.6, 1289.2, 1225.6, 1171.4, 754.4, 697.8 cm<sup>-1</sup>. HRMS (ESI) Calcd. for C<sub>46</sub>H<sub>37</sub>N<sub>3</sub>NaO<sub>12</sub> [M+Na]<sup>+</sup>: 846.2269, Found: 846.2256.

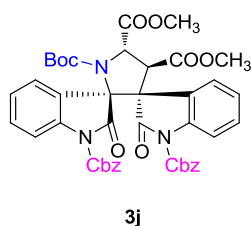

Product **3j** was obtained in 97% yield as a white solid. <sup>1</sup>H NMR (300 MHz, CDCl<sub>3</sub>), δ 7.96 (s, 1H), 7.69 (t, *J*= 8.9 Hz, 2H), 7.35-7.07 (m, 15H), 5.39 (d, *J*= 8.6 Hz, 1H), 5.28 (t, *J*= 5.6 Hz, 2H), 5.20 (t, *J*= 7.2 Hz, 2H), 4.29 (d, *J*= 8.6 Hz, 1H), 3.92 (s, 3H), 3.34 (s, 3H), 1.29 (s, 2H), 0.98 (s, 7H); <sup>13</sup>C NMR (75 MHz, CDCl<sub>3</sub>) δ 171.5, 170.1, 167.2, 151.5, 149.9, 149.7, 138.4, 137.7, 134.8, 134.7, 130.1, 129.9, 128.5, 128.4, 128.3, 128.2, 128.1, 127.7, 127.6, 126.9, 126.5, 124.5, 124.2, 122.2, 114.6, 114.3, 82.7, 68.4, 68.1, 61.4, 58.3, 53.4, 52.9, 52.6, 52.5, 52.4, 27.8 (d, *J*= 50.4 Hz, 1C). IR (KBr) ν 3447.9, 2954.7, 2926.0, 1780.4, 1741.1, 1713.2, 1482.2, 1466.8, 1379.5, 1345.5, 1290.0, 1224.7, 1169.5, 1150.3, 1099.7, 754.3, 697.0. HRMS (ESI) Calcd. for C<sub>43</sub>H<sub>39</sub>N<sub>3</sub>NaO<sub>12</sub> [M+Na]<sup>+</sup>: 812.2426, Found: 812.2424.

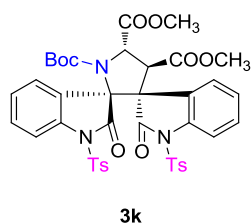

Product **3k** was obtained in 93% yield as a white solid.  $^1\text{H}$  NMR (300 MHz,  $\text{CDCl}_3$ ),  $\delta$  8.03 (d,  $J$  = 7.4 Hz, 1H), 7.83-7.70 (m, 5H), 7.52 (d,  $J$  = 8.1 Hz, 1H), 7.36 (t,  $J$  = 7.7 Hz, 1H), 7.24-7.08 (m, 8H), 5.09 (d,  $J$  = 10.1 Hz, 1H), 4.13 (d,  $J$  = 10.2 Hz, 1H), 3.84 (s, 3H), 2.85 (d,  $J$  = 95.8 Hz, 3H), 2.46 (s, 3H), 2.38 (s, 3H), 1.23 (s, 3H), 0.95 (s, 6H);  $^{13}\text{C}$  NMR (75 MHz,  $\text{CDCl}_3$ )  $\delta$  171.6, 169.2, 169.1, 166.3, 145.7, 145.5, 137.7, 137.6, 134.5, 130.4, 129.9, 129.6, 129.3, 128.3, 128.2, 127.3, 127.1, 124.3, 124.1, 113.1, 112.8, 83.4, 72.4, 60.5, 53.2, 53.1, 51.8, 27.8, 22.7, 21.7. IR (KBr)  $\nu$  3446.6, 2956.3, 2924.0, 1764.3, 1712.9, 1603.2, 1464.1, 1377.9, 1235.8, 1191.0, 1088.6, 812.7, 753.4, 688.9, 660.4  $\text{cm}^{-1}$ . HRMS (ESI) Calcd. for  $\text{C}_{41}\text{H}_{39}\text{N}_3\text{NaO}_{12}\text{S}_2$   $[\text{M}+\text{Na}]^+$ : 852.1867, Found: 852.1829.

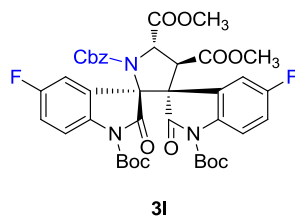

Product **3l** was obtained in 96% yield as a white solid.  $^1\text{H}$  NMR (300 MHz,  $\text{CDCl}_3$ ),  $\delta$  7.73 (s, 2H), 7.50 (dd,  $J_1$  = 2.6 Hz,  $J_2$  = 8.0 Hz, 1H), 7.33 (t,  $J$  = 4.8 Hz, 2H), 7.21-6.95 (m, 5H), 6.76 (s, 1H), 5.48 (d,  $J$  = 7.3 Hz, 1H), 5.17-4.81 (m, 2H), 4.12 (d,  $J$  = 6.7 Hz, 1H), 3.79 (d,  $J$  = 96.2 Hz, 3H), 3.54 (s, 3H), 1.25 (s, 18H);  $^{13}\text{C}$  NMR (75 MHz,  $\text{CDCl}_3$ )  $\delta$  170.9, 170.7, 168.9, 167.3, 159.6 (d,  $J$  = 242.8 Hz, 1C), 159.0 (d,  $J$  = 242.7 Hz, 1C), 152.6, 148.1 (d,  $J$  = 11.6 Hz, 1C), 135.4, 134.6, 128.5, 128.4, 128.3, 128.0, 127.8, 123.0 (d,  $J$  = 8.3 Hz, 1C), 117.2, 117.0, 116.7, 116.4, 115.9, 115.8, 114.6 (d,  $J$  = 25.8 Hz, 1C), 113.8 (d,  $J$  = 25.8 Hz, 1C), 85.0, 84.3, 68.5, 52.9, 27.7. IR (KBr)  $\nu$  3442.2, 2957.1, 2924.1, 2852.9, 1777.6, 1736.0, 1486.0, 1345.7, 1300.3, 1266.6, 1151.6, 1102.8, 820.6, 765.7, 698.3  $\text{cm}^{-1}$ . HRMS (ESI) Calcd. for  $\text{C}_{40}\text{H}_{39}\text{F}_2\text{N}_3\text{NaO}_{12}$   $[\text{M}+\text{Na}]^+$ : 814.2394, Found: 814.2389.

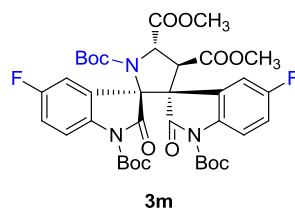

Product **3m** was obtained in 98% yield as a white solid.  $^1\text{H}$  NMR (300 MHz,  $\text{CDCl}_3$ ),  $\delta$  7.77-7.61 (m, 3H), 6.99 (q,  $J$  = 8.3 Hz, 3H), 5.37 (d,  $J$  = 6.5 Hz, 1H), 4.15 (d,  $J$  = 7.7 Hz, 1H), 3.92 (s, 3H), 3.48 (s, 3H), 1.46 (s, 9H), 1.43 (s, 9H), 1.24 (s, 9H);  $^{13}\text{C}$  NMR (75 MHz,  $\text{CDCl}_3$ )  $\delta$  171.3, 170.3, 167.3, 159.6 (d,  $J$  = 242.6 Hz, 1C), 159.0 (d,  $J$  = 242.7 Hz, 1C), 151.5, 148.2, 148.1, 135.2 (d,  $J$  = 2.4 Hz, 1C), 134.3 (d,  $J$  = 2.4 Hz, 1C), 116.8, 116.5, 116.2, 115.7 (d,  $J$  = 7.8 Hz, 1C), 115.4, 114.7, 114.3, 114.0, 113.7, 84.8, 84.4, 83.0, 61.7, 58.3, 53.0, 52.8, 51.6, 27.7.

IR (KBr)  $\nu$  3441.1, 2981.2, 2923.9, 2851.5, 1777.4, 1737.6, 1486.1, 1371.0, 1347.7, 1300.4, 1269.0, 1251.0, 1152.9, 821.9  $\text{cm}^{-1}$ . HRMS (ESI) Calcd. for  $\text{C}_{37}\text{H}_{41}\text{F}_2\text{N}_3\text{NaO}_{12}$   $[\text{M}+\text{Na}]^+$ : 780.2551, Found: 780.2562.

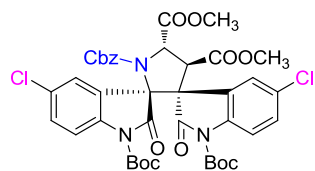

**3n**

Product **3n** was obtained in 92% yield as a white solid.  $^1\text{H}$  NMR (300 MHz,  $\text{CDCl}_3$ ),  $\delta$  7.74-7.70 (m, 3H), 7.35-7.13 (m, 7H), 6.77 (d,  $J$ = 7.0 Hz, 1H), 5.46 (d,  $J$ = 7.4 Hz, 1H), 5.15-4.82 (m, 2H), 4.14 (d,  $J$ = 6.9 Hz, 1H), 3.95-3.61 (m, 3H), 3.53 (s, 3H), 1.48 (s, 9H), 1.43 (s,

9H);  $^{13}\text{C}$  NMR (75 MHz,  $\text{CDCl}_3$ )  $\delta$  170.8, 170.3, 167.2, 152.6, 147.9, 137.8, 137.1, 130.6, 130.3, 130.2, 130.0, 129.5, 128.5, 128.4, 128.3, 127.8, 127.0, 126.3, 125.4, 123.1, 115.9, 115.8, 85.1, 84.9, 84.5, 68.6, 68.4, 52.9, 52.8, 27.8. IR (KBr)  $\nu$  3440.7, 2982.2, 2924.1, 2851.8, 1780.8, 1756.2, 1730.4, 1476.1, 1336.9, 1295.3, 1250.1, 1155.2, 1111.5, 823.1, 700.2  $\text{cm}^{-1}$ . HRMS (ESI) Calcd. for  $\text{C}_{40}\text{H}_{39}\text{Cl}_2\text{N}_3\text{NaO}_{12}$   $[\text{M}+\text{Na}]^+$ : 846.1803, Found: 846.1804.

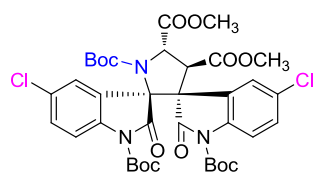

**3o**

Product **3o** was obtained in 97% yield as a white solid.  $^1\text{H}$  NMR (300 MHz,  $\text{CDCl}_3$ ),  $\delta$  7.82 (s, 1H), 7.70 (d,  $J$ = 8.9 Hz, 1H), 7.66-7.64 (m, 1H), 7.29-7.22 (m, 3H), 5.37 (t,  $J$ = 2.6 Hz, 1H), 4.15 (d,  $J$ = 7.7 Hz, 1H), 3.92 (s, 3H), 3.48 (s, 3H), 1.47 (s, 9H), 1.44 (s,

9H), 1.24 (s, 9H);  $^{13}\text{C}$  NMR (75 MHz,  $\text{CDCl}_3$ )  $\delta$  171.1, 170.1, 167.2, 151.6, 148.2, 148.0, 137.8, 136.9, 130.5, 130.0, 129.9, 129.8, 129.5, 126.3, 125.5, 123.6, 115.7, 85.0, 84.8, 83.0, 61.7, 59.8, 58.4, 53.0, 52.8, 52.6, 51.8, 48.9, 27.8. IR (KBr)  $\nu$  3440.2, 2982.0, 2927.7, 2852.6, 1784.8, 1741.3, 1728.1, 1710.9, 1476.6, 1370.9, 1338.3, 1298.4, 1249.3, 1152.3, 1108.6, 821.2, 766.3  $\text{cm}^{-1}$ . HRMS (ESI) Calcd. for  $\text{C}_{37}\text{H}_{41}\text{Cl}_2\text{N}_3\text{NaO}_{12}$   $[\text{M}+\text{Na}]^+$ : 812.1960, Found: 812.1949.

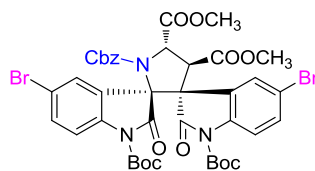

**3p**

Product **3p** was obtained in 98% yield as a white solid.  $^1\text{H}$  NMR (300 MHz,  $\text{CDCl}_3$ ),  $\delta$  7.87 (d,  $J$ = 2.1 Hz, 1H), 7.68-7.62 (m, 2H), 7.47-7.33 (m, 6H), 7.22-7.16 (m, 1H), 6.74 (s, 1H), 5.45 (d,  $J$ = 6.0 Hz, 1H), 5.15-4.83 (m, 2H), 4.14 (d,  $J$ = 7.0 Hz, 1H), 3.95-3.61 (m,

3H), 3.52 (s, 3H), 1.49 (s, 9H), 1.44 (s, 9H);  $^{13}\text{C}$  NMR (75 MHz,  $\text{CDCl}_3$ )  $\delta$  170.9, 170.7, 167.1, 152.5, 147.9, 138.4, 137.6, 133.5, 133.1, 133.0, 129.8, 129.1, 128.5, 128.4, 128.2, 128.0, 127.8, 126.8, 126.7, 123.5, 117.5, 116.9, 116.2, 116.1, 85.2, 84.6, 68.6, 61.8, 52.9, 52.6, 27.7. IR (KBr)  $\nu$



3442.4, 2924.1, 1852.5, 1781.7, 1756.6, 1724.7, 1472.2, 1335.5, 1249.9, 1155.2, 1112.8, 1020.0, 821.7, 701.4  $\text{cm}^{-1}$ . HRMS (ESI) Calcd. for  $\text{C}_{40}\text{H}_{39}\text{Br}_2\text{N}_3\text{NaO}_{12}$   $[\text{M}+\text{Na}]^+$ : 934.0793, Found: 934.0793.

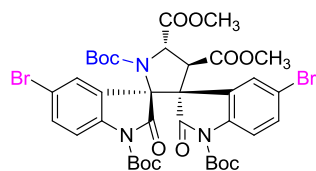

**3q**

Product **3q** was obtained in 98% yield as a white solid.  $^1\text{H}$  NMR (300 MHz,  $\text{CDCl}_3$ ),  $\delta$  7.94 (s, 1H), 7.67-7.58 (m, 2H), 7.43-7.39 (m, 2H), 7.35 (s., 1H), 5.36 (d,  $J$ = 4.4 Hz, 1H), 4.15 (d,  $J$ = 7.7 Hz, 1H), 3.93 (s, 3H), 3.48 (s, 3H), 1.47 (s, 9H), 1.44 (s, 9H), 1.24 (s, 9H);

$^{13}\text{C}$  NMR (75 MHz,  $\text{CDCl}_3$ )  $\delta$  171.1, 169.9, 169.1, 167.2, 151.6, 148.1, 148.0, 138.2, 137.4, 133.0, 132.7, 129.7, 129.2, 128.3, 127.4, 126.7, 117.4, 117.0, 116.4, 85.1, 84.6, 83.1, 61.7, 53.0, 52.6, 51.9, 27.8. IR (KBr)  $\nu$  3441.3, 2981.8, 2924.3, 2852.0, 1784.1, 1731.7, 1474.7, 1369.8, 1338.7, 1298.7, 1250.1, 1151.3, 1109.0, 835.9  $\text{cm}^{-1}$ . HRMS (ESI) Calcd. for  $\text{C}_{37}\text{H}_{41}\text{Br}_2\text{N}_3\text{NaO}_{12}$   $[\text{M}+\text{Na}]^+$ : 900.0949, Found: 900.0926.

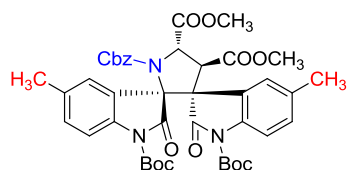

**3r**

Product **3r** was obtained in 86% yield as a white solid.  $^1\text{H}$  NMR (300 MHz,  $\text{CDCl}_3$ ),  $\delta$  7.58 (d,  $J$ = 8.6 Hz, 2H), 7.33 (s, 3H), 7.07 (d,  $J$ = 7.7 Hz, 4H), 6.66 (s, 1H), 5.47 (s, 1H), 5.08-4.77 (m, 2H), 4.23 (d,  $J$ = 8.1 Hz, 1H), 3.75 (d,  $J$ = 109.7 Hz, 3H), 3.42 (s, 3H),

2.37 (s, 3H), 2.33 (s, 3H), 1.44 (s, 9H), 1.39 (s, 9H);  $^{13}\text{C}$  NMR (75 MHz,  $\text{CDCl}_3$ )  $\delta$  171.2, 170.7, 170.2, 167.5, 152.7, 148.2, 136.7, 136.0, 135.2, 133.8, 133.5, 130.3, 128.2, 127.3, 126.7, 125.0, 122.1, 114.3, 114.2, 84.1, 83.5, 68.2, 61.8, 58.4, 52.7, 52.4, 51.5, 27.7, 21.3, 21.1. IR (KBr)  $\nu$  3439.6, 2923.5, 1777.4, 1754.4, 1728.7, 1719.2, 1492.3, 1341.7, 1159.7, 1114.8, 996.6, 765.3, 700.6  $\text{cm}^{-1}$ . HRMS (ESI) Calcd. for  $\text{C}_{42}\text{H}_{45}\text{N}_3\text{NaO}_{12}$   $[\text{M}+\text{Na}]^+$ : 806.2895, Found: 806.2894.

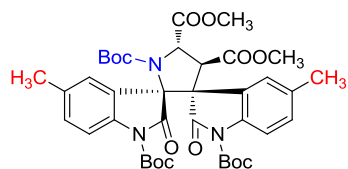

**3s**

Product **3s** was obtained in 82% yield as a white solid.  $^1\text{H}$  NMR (300 MHz,  $\text{CDCl}_3$ ),  $\delta$  7.66-7.49 (m, 3H), 7.06 (d,  $J$ = 7.3 Hz, 3H), 5.37 (d,  $J$ = 8.6 Hz, 1H), 4.23 (d,  $J$ = 8.6 Hz, 1H), 3.91 (s, 3H), 3.38 (s, 3H), 2.37 (s, 3H), 2.33 (s, 3H), 1.43 (s, 9H), 1.40 (s, 9H), 1.02 (s, 9H);  $^{13}\text{C}$  NMR (75 MHz,  $\text{CDCl}_3$ )  $\delta$  171.5, 170.7, 170.4,

167.6, 151.8, 148.4, 48.2, 136.6, 135.8, 133.7, 133.4, 130.2, 130.0, 127.2, 126.7, 125.9, 122.4, 114.1, 113.8, 84.0, 83.5, 82.4, 61.7, 58.3, 52.8, 52.3, 51.8, 27.7, 21.2, 21.1. IR (KBr)  $\nu$  3447.4,

2980.1, 2928.5, 2854.1, 1778.9, 1734.6, 1716.8, 1491.7, 1370.1, 1341.4, 1249.7, 1157.0, 819.9  $\text{cm}^{-1}$ . HRMS (ESI) Calcd. for  $\text{C}_{39}\text{H}_{47}\text{N}_3\text{NaO}_{12}$   $[\text{M}+\text{Na}]^+$ : 772.3052, Found: 772.3031.

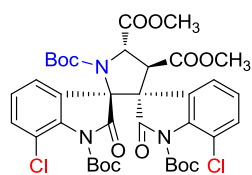

**3t**

Product **3t** was obtained in 98% yield as a white solid.  $^1\text{H}$  NMR (300 MHz,  $\text{CDCl}_3$ ),  $\delta$  8.01 (d,  $J = 7.4$  Hz, 1H), 7.32-7.28 (m, 3H), 7.21-7.10 (m, 2H), 5.26 (d,  $J = 9.4$  Hz, 1H), 4.25 (d,  $J = 9.5$  Hz, 1H), 3.90 (s, 3H), 3.37 (s, 3H), 1.50 (s, 9H), 1.45 (s, 9H), 1.08 (s, 9H);  $^{13}\text{C}$  NMR (75 MHz,  $\text{CDCl}_3$ )

$\delta$  171.6, 170.2, 169.9, 166.7, 151.3, 147.2, 146.7, 136.4, 135.3, 131.5, 131.3, 129.2, 125.7, 125.6, 125.2, 125.0, 124.5, 118.6, 118.3, 85.6, 85.1, 83.4, 62.3, 60.8, 58.4, 53.2, 52.6, 27.6. IR (KBr)  $\nu$  3441.9, 2983.2, 2924.8, 1803.9, 1782.7, 1754.5, 1729.8, 1711.7, 1370.6, 1347.9, 1250.8, 1149.6, 839.7, 734.6  $\text{cm}^{-1}$ . HRMS (ESI) Calcd. for  $\text{C}_{37}\text{H}_{41}\text{Cl}_2\text{N}_3\text{NaO}_{12}$   $[\text{M}+\text{Na}]^+$ : 812.1960, Found: 812.1938.

## 6. Experimental data for spirocyclic aziridines **4**

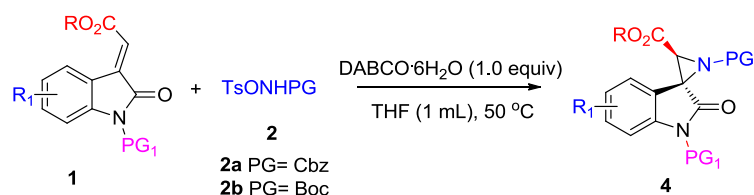

**General procedure:** To a 5.0 mL vial were successively added methyleneindolinones **1** (0.15 mmol), N-tosyloxycarbamates **2** (0.375 mmol), DABCO·6H<sub>2</sub>O (33.0 mg, 0.15 mmol) and 1.0 mL THF. The reaction was kept at 50 °C till almost full consumption of **1** by TLC analysis (5-60 min), and then the reaction mixture was directly subjected to flash column chromatography on silica gel (petroleum ether/ ethyl acetate) to afford the corresponding products **4**.

### 1-benzyl 1'-tert-butyl 3-methyl 2'-oxospiro[aziridine -2,3'-indoline] -1,1',3-tricarboxylate(**4a**)

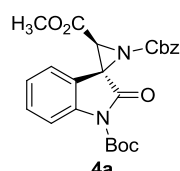

**4a**

Product **4a** was obtained in 72% yield as a white solid.  $^1\text{H}$  NMR (300 MHz,  $\text{CDCl}_3$ ),  $\delta$  7.94 (d,  $J = 8.3$  Hz, 1H), 7.43-7.34 (m, 7H), 7.17 (t,  $J = 7.5$  Hz, 1H), 5.19 (q,  $J = 12.0$  Hz, 2H), 3.91 (s, 1H), 3.75 (s, 3H), 1.64 (s, 9H);  $^{13}\text{C}$  NMR (75 MHz,  $\text{CDCl}_3$ )  $\delta$  167.5, 164.7, 157.9, 148.4, 141.4, 134.7, 130.7, 128.7, 128.5,

128.4, 124.9, 123.8, 119.6, 115.4, 85.2, 69.3, 52.8, 49.4, 49.1, 28.0. IR (KBr)  $\nu$  3435.5, 2924.0, 2851.4, 1775.3, 1741.4, 1324.9, 1293.6, 1252.1, 1216.6, 1169.9, 1099.5, 762.4, 730.7  $\text{cm}^{-1}$ .

HRMS (ESI) Calcd. for C<sub>24</sub>H<sub>24</sub>N<sub>2</sub>NaO<sub>7</sub> [M+Na]<sup>+</sup>: 475.1476, Found: 475.1468.

**1,1'-di-tert-butyl 3-methyl 2'-oxospiro[aziridine-2,3'-indoline]-1,1',3-tricarboxylate (4b)**

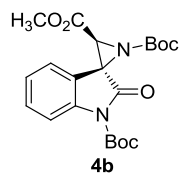

Product **4b** was obtained in 55% yield as a white solid. <sup>1</sup>H NMR (300 MHz, CDCl<sub>3</sub>), δ 7.93 (d, *J* = 8.0 Hz, 1H), 7.41 (t, *J* = 7.2 Hz, 2H), 7.17 (t, *J* = 7.8 Hz, 1H), 3.86 (s, 1H), 3.76 (s, 3H), 1.63 (s, 9H), 1.45 (s, 9H); <sup>13</sup>C NMR (75 MHz, CDCl<sub>3</sub>) δ 167.4, 165.2, 156.4, 148.5, 141.3, 130.4, 124.8, 123.8, 120.1, 115.2,

85.0, 83.7, 52.8, 49.3, 49.1, 28.0, 27.8. HRMS (ESI) Calcd. for C<sub>21</sub>H<sub>26</sub>N<sub>2</sub>NaO<sub>7</sub> [M+Na]<sup>+</sup>: 441.1632, Found: 441.1627.

**1-benzyl 1'-tert-butyl 3-ethyl 2'-oxospiro[aziridine-2,3'-indoline]-1,1',3-tricarboxylate (4c)**

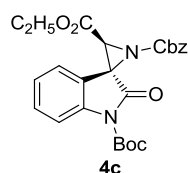

Product **4c** was obtained in 77% yield as a white solid. <sup>1</sup>H NMR (300 MHz, CDCl<sub>3</sub>), δ 7.93 (d, *J* = 8.1 Hz, 1H), 7.43-7.31 (m, 7H), 7.16 (t, *J* = 7.8 Hz, 1H), 5.18 (q, *J* = 12.0 Hz, 2H), 4.27-4.14 (m, 2H), 3.90 (s, 1H), 1.65 (s, 9H), 1.24 (t, *J* = 7.0 Hz, 3H); <sup>13</sup>C NMR (75 MHz, CDCl<sub>3</sub>) δ 167.5, 164.2, 158.0, 148.4,

141.3, 134.7, 130.6, 128.7, 128.5, 128.4, 124.8, 123.9, 119.6, 115.4, 85.2, 69.3, 62.2, 49.5, 49.0, 28.0, 14.0. IR (KBr) ν 3440.3, 2923.2, 2851.2, 1771.0, 1758.3, 1743.8, 1322.1, 1246.1, 1183.1, 1152.0, 1038.4, 779.2 cm<sup>-1</sup>. HRMS (ESI) Calcd. for C<sub>25</sub>H<sub>26</sub>N<sub>2</sub>NaO<sub>7</sub> [M+Na]<sup>+</sup>: 489.1632, Found: 489.1623.

**1,1'-di-tert-butyl 3-ethyl 2'-oxospiro[aziridine-2,3'-indoline]-1,1',3-tricarboxylate (4d)**

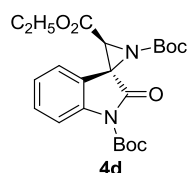

Product **4d** was obtained in 58% yield as a white solid. <sup>1</sup>H NMR (300 MHz, CDCl<sub>3</sub>), δ 7.93 (d, *J* = 8.1 Hz, 1H), 7.41 (t, *J* = 7.6 Hz, 2H), 7.16 (t, *J* = 7.5 Hz, 1H), 4.27-4.14 (m, 2H), 3.84 (s, 1H), 1.63 (s, 9H), 1.44 (s, 9H), 1.24 (t, *J* = 4.0 Hz, 3H); <sup>13</sup>C NMR (75 MHz, CDCl<sub>3</sub>) δ 167.4, 164.7, 156.5, 148.5, 141.3, 130.4,

124.7, 123.9, 120.2, 115.2, 85.0, 83.6, 62.1, 49.4, 49.0, 28.0, 27.8, 14.0. IR (KBr) ν 3456.5, 2981.7, 2932.4, 1771.6, 1738.4, 1468.7, 1369.9, 1325.8, 1252.9, 1189.5, 1151.4, 1100.6, 1025.2, 771.8 cm<sup>-1</sup>. HRMS (ESI) Calcd. for C<sub>22</sub>H<sub>28</sub>N<sub>2</sub>NaO<sub>7</sub> [M+Na]<sup>+</sup>: 455.1789, Found: 455.1783.

**1-benzyl 1',3-di-tert-butyl 2'-oxospiro[aziridine-2,3'-indoline]-1,1',3-tricarboxylate (4e)**

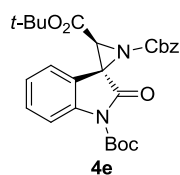

Product **4e** was obtained in 70% yield as a white solid. <sup>1</sup>H NMR (300 MHz, CDCl<sub>3</sub>), δ 7.93 (d, *J* = 8.1 Hz, 1H), 7.43-7.31 (m, 7H), 7.15 (t, *J* = 7.5 Hz, 1H), 5.18 (q, *J* = 12.0 Hz, 2H), 3.82 (s, 1H), 1.65 (s, 9H), 1.40 (s, 9H); <sup>13</sup>C NMR (75

MHz, CDCl<sub>3</sub>)  $\delta$  167.7, 163.1, 158.2, 148.5, 141.2, 134.8, 130.5, 128.7, 128.4, 124.6, 123.9, 119.8, 115.3, 85.1, 83.6, 69.2, 50.1, 48.7, 28.0, 27.9. IR (KBr)  $\nu$  3438.7, 2982.8, 2922.8, 1795.8, 1766.1, 1742.8, 1326.0, 1254.5, 1150.5, 838.1, 806.7, 774.9 cm<sup>-1</sup>. HRMS (ESI) Calcd. for C<sub>27</sub>H<sub>30</sub>N<sub>2</sub>NaO<sub>7</sub> [M+Na]<sup>+</sup>: 517.1945, Found: 517.1934.

#### tri-tert-butyl 2'-oxospiro[aziridine-2,3'-indoline]-1,1',3-tricarboxylate (4f)

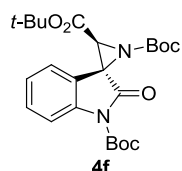

Product **4f** was obtained in 59% yield as a white solid. <sup>1</sup>H NMR (300 MHz, CDCl<sub>3</sub>),  $\delta$  7.92 (d,  $J$  = 8.2 Hz, 1H), 7.44-7.37 (m, 2H), 7.15 (t,  $J$  = 7.6 Hz, 1H), 3.76 (s, 1H), 1.63 (s, 9H), 1.44 (s, 9H), 1.40 (s, 9H); <sup>13</sup>C NMR (75 MHz, CDCl<sub>3</sub>)  $\delta$  167.6, 163.6, 156.7, 148.6, 141.2, 130.3, 124.6, 123.9, 120.3, 115.1, 84.9, 83.4, 83.3, 50.0, 48.8, 28.0, 27.9, 27.8. IR (KBr)  $\nu$  3440.1, 2980.9, 2930.7, 1798.2, 1774.5, 1740.1, 1370.6, 1326.1, 1292.5, 1254.0, 1149.0, 841.7, 808.3, 756.4 cm<sup>-1</sup>. HRMS (ESI) Calcd. for C<sub>24</sub>H<sub>32</sub>N<sub>2</sub>NaO<sub>7</sub> [M+Na]<sup>+</sup>: 483.2102, Found: 483.2090.

#### 1-benzyl 1'-ethyl 3-methyl 2'-oxospiro[aziridine-2,3'-indoline]-1,1',3-tricarboxylate (4g)

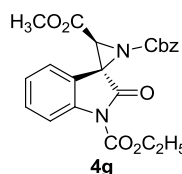

Product **4g** was obtained in 59% yield as a white solid. <sup>1</sup>H NMR (300 MHz, CDCl<sub>3</sub>),  $\delta$  8.00 (d,  $J$  = 8.1 Hz, 1H), 7.43 (t,  $J$  = 7.8 Hz, 2H), 7.34 (s, 5H), 7.19 (t,  $J$  = 7.6 Hz, 1H), 5.19 (q,  $J$  = 12.0 Hz, 2H), 4.53-4.46 (m, 2H), 3.92 (s, 1H), 3.76 (s, 3H), 1.46 (t,  $J$  = 7.1 Hz, 3H); <sup>13</sup>C NMR (75 MHz, CDCl<sub>3</sub>)  $\delta$  167.4, 164.6, 157.7, 150.1, 141.0, 134.7, 130.8, 128.7, 128.5, 128.4, 125.2, 124.0, 119.7, 115.5, 69.4, 63.9, 52.9, 49.5, 49.0, 14.2. IR (KBr)  $\nu$  3436.7, 2959.9, 2921.1, 2850.8, 1799.0, 1776.6, 1748.7, 1741.0, 1251.1, 1184.0, 1171.9, 1098.9, 1026.9, 799.3, 760.0 cm<sup>-1</sup>. HRMS (ESI) Calcd. for C<sub>22</sub>H<sub>20</sub>N<sub>2</sub>NaO<sub>7</sub> [M+Na]<sup>+</sup>: 447.1163, Found: 447.1163.

#### 1,1'-dibenzyl 3-methyl 2'-oxospiro[aziridine-2,3'-indoline]-1,1',3-tricarboxylate (4h)

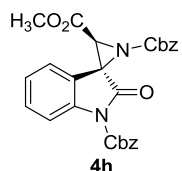

Product **4h** was obtained in 72% yield as a white solid. <sup>1</sup>H NMR (300 MHz, CDCl<sub>3</sub>),  $\delta$  8.00 (d,  $J$  = 8.4 Hz, 1H), 7.53-7.30 (m, 12 H), 7.19 (t,  $J$  = 7.6 Hz, 1H), 5.46 (q,  $J$  = 12.3 Hz, 2H), 5.19 (q,  $J$  = 12.0 Hz, 2H), 3.93 (s, 1H), 3.75 (s, 3H); <sup>13</sup>C NMR (75 MHz, CDCl<sub>3</sub>)  $\delta$  167.3, 164.6, 157.7, 150.0, 140.9, 134.6, 134.5, 130.8, 128.7, 128.6, 128.5, 128.4, 128.2, 125.3, 124.0, 119.7, 115.6, 69.4, 69.1, 52.9, 49.5, 49.0. IR (KBr)  $\nu$  3439.8, 2961.0, 2921.4, 2850.8, 1798.6, 1774.1, 1744.7, 1260.7, 1223.6, 1099.7, 1028.7, 803.0, 760.6, 698.8 cm<sup>-1</sup>. HRMS (ESI) Calcd. for C<sub>27</sub>H<sub>22</sub>N<sub>2</sub>NaO<sub>7</sub> [M+Na]<sup>+</sup>: 509.1319, Found: 509.1316.

**1-benzyl 1'-tert-butyl 3-methyl 5'-fluoro-2'-oxospiro[aziridine-2,3'-indoline]-1,1',3-tricarbonylate (4i)**

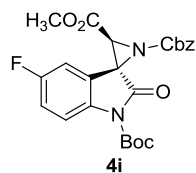

Product **4i** was obtained in 81% yield as a white solid.  $^1\text{H}$  NMR (300 MHz,  $\text{CDCl}_3$ ),  $\delta$  7.93 (dd,  $J_1 = J_2 = 4.4$  Hz, 1H), 7.34 (s, 5H), 7.18 (dd,  $J_1 = 2.7$  Hz,  $J_2 = 2.6$  Hz, 1H), 7.14-7.07 (m, 1H), 5.19 (t,  $J = 12.5$  Hz, 2H), 3.91 (s, 1H), 3.78 (s, 3H), 1.64 (s, 9H);  $^{13}\text{C}$  NMR (75 MHz,  $\text{CDCl}_3$ )  $\delta$  167.1, 163.0 (d,  $J = 229.4$  Hz, 1C), 158.2, 157.6, 148.3, 137.3, 134.6, 128.7, 128.6, 128.5, 121.5 (d,  $J = 9.3$  Hz, 1C), 117.3 (d,  $J = 23.0$  Hz, 1C), 116.9 (d,  $J = 7.8$  Hz, 1C), 111.7 (d,  $J = 26.2$  Hz, 1C), 85.4, 69.5, 53.0, 49.5, 48.8, 28.0. IR (KBr)  $\nu$  3438.2, 2954.3, 2923.7, 2850.9, 1777.7, 1740.9, 1484.7, 1283.2, 1256.4, 1169.4, 803.2, 730.3  $\text{cm}^{-1}$ . HRMS (ESI) Calcd. for  $\text{C}_{24}\text{H}_{23}\text{FN}_2\text{NaO}_7$   $[\text{M}+\text{Na}]^+$ : 493.1382, Found: 493.1387.

**1,1'-di-tert-butyl 3-methyl 5'-fluoro-2'-oxospiro[aziridine-2,3'-indoline]-1,1',3-tricarbonylate (4j)**

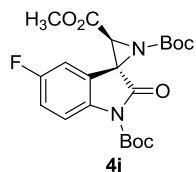

Product **4j** was obtained in 91% yield as a white solid.  $^1\text{H}$  NMR (300 MHz,  $\text{CDCl}_3$ ),  $\delta$  7.91 (dd,  $J_1 = J_2 = 4.4$  Hz, 1H), 7.18 (dd,  $J_1 = J_2 = 2.7$  Hz, 1H), 7.13-7.07 (m, 1H), 3.86 (s, 1H), 3.78 (s, 3H), 1.62 (s, 9H), 1.45 (s, 9H);  $^{13}\text{C}$  NMR (75 MHz,  $\text{CDCl}_3$ )  $\delta$  167.1, 163.2 (d,  $J = 265.1$  Hz, 1C), 158.2, 156.0, 148.1, 137.3 (d,  $J = 2.6$  Hz, 1C), 122.0 (d,  $J = 9.1$  Hz, 1C), 117.1 (d,  $J = 23.0$  Hz, 1C), 116.7 (d,  $J = 7.8$  Hz, 1C), 111.7 (d,  $J = 26.1$  Hz, 1C), 85.2, 83.9, 52.9, 49.4, 48.9, 28.0, 27.8. IR (KBr)  $\nu$  3431.4, 2989.1, 2981.0, 2924.1, 1774.3, 1759.9, 1748.2, 1739.9, 1481.7, 1369.9, 1329.3, 1299.1, 1272.1, 1209.7, 1150.4, 841.1, 806.9  $\text{cm}^{-1}$ . HRMS (ESI) Calcd. for  $\text{C}_{21}\text{H}_{25}\text{FN}_2\text{NaO}_7$   $[\text{M}+\text{Na}]^+$ : 459.1538, Found: 459.1525.

**1-benzyl 1'-tert-butyl 3-methyl 5'-chloro-2'-oxospiro[aziridine-2,3'-indoline]-1,1',3-tricarbonylate (4k)**

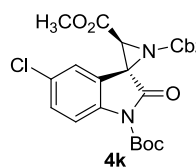

Product **4k** was obtained in 80% yield as a white solid.  $^1\text{H}$  NMR (300 MHz,  $\text{CDCl}_3$ ),  $\delta$  7.90 (d,  $J = 8.7$  Hz, 1H), 7.43-7.34 (m, 7H), 5.19 (q,  $J = 12.1$  Hz, 2H), 3.90 (s, 1H), 3.78 (s, 3H), 1.63 (s, 9H);  $^{13}\text{C}$  NMR (75 MHz,  $\text{CDCl}_3$ )  $\delta$  166.9, 164.5, 157.5, 148.2, 139.8, 134.6, 130.7, 130.6, 128.7, 128.6, 128.5, 124.3, 121.4, 116.7, 85.6, 69.5, 53.0, 49.5, 48.6, 27.9. IR (KBr)  $\nu$  3438.3, 2981.3, 1926.6, 1778.9, 1744.6, 1457.1, 1328.0, 1297.7, 1255.3, 1178.1, 1153.1, 829.0, 696.5  $\text{cm}^{-1}$ . HRMS (ESI) Calcd. for

C<sub>24</sub>H<sub>23</sub>ClN<sub>2</sub>NaO<sub>7</sub> [M+Na]<sup>+</sup>: 509.1086, Found: 509.1078.

**1,1'-di-tert-butyl 3-methyl 5'-chloro-2'-oxospiro[aziridine-2,3'-indoline]-1,1',3-tricarboxylate (4l)**

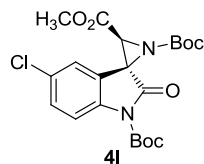

Product **4l** was obtained in 79% yield as a white solid. <sup>1</sup>H NMR (300 MHz, CDCl<sub>3</sub>), δ 7.88 (d, *J* = 8.7 Hz, 1H), 7.42 (d, *J* = 2.0 Hz, 1H), 7.37 (dd, *J* = 2.2 Hz, 1H), 3.85 (s, 1H), 3.79 (s, 3H), 1.62 (s, 9H), 1.45 (s, 9H); <sup>13</sup>C NMR (75

MHz, CDCl<sub>3</sub>) δ 166.8, 164.9, 156.0, 148.3, 139.8, 130.5, 130.4, 124.3, 121.9, 116.5, 85.4, 84.0, 52.9, 49.4, 48.7, 28.0, 27.8. IR (KBr) ν 3433.5, 2977.4, 2929.3, 1775.4, 1760.2, 1742.8, 1371.3, 1326.0, 1253.8, 1153.8, 827.6, 808.4 cm<sup>-1</sup>. HRMS (ESI) Calcd. for C<sub>21</sub>H<sub>25</sub>ClN<sub>2</sub>NaO<sub>7</sub> [M+Na]<sup>+</sup>: 475.1242, Found: 475.1253.

**1-benzyl 1'-tert-butyl 3-methyl 5'-bromo-2'-oxospiro[aziridine-2,3'-indoline]-1,1',3-tricarboxylate (4m)**

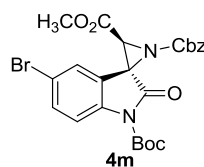

Product **4m** was obtained in 65% yield as a white solid. <sup>1</sup>H NMR (300 MHz, CDCl<sub>3</sub>), δ 7.69 (d, *J* = 8.6 Hz, 1H), 7.56-7.51 (m, 2H), 7.34 (s, 5H), 5.19 (q, *J* = 12.2 Hz, 2H), 3.90 (s, 1H), 3.79 (s, 3H), 1.63 (s, 9H); <sup>13</sup>C NMR (75 MHz,

CDCl<sub>3</sub>) δ 166.7, 164.5, 157.5, 148.2, 140.4, 134.6, 133.6, 128.7, 128.6, 128.5, 127.1, 121.7, 118.0, 117.1, 85.6, 69.5, 53.0, 49.5, 48.5, 28.0. IR (KBr) ν 3438.3, 2982.0, 2927.3, 1764.2, 1753.1, 1730.1, 1263.5, 1173.9, 1151.0, 833.5, 800.5, 755.7, 701.8 cm<sup>-1</sup>. HRMS (ESI) Calcd. for C<sub>24</sub>H<sub>23</sub>BrN<sub>2</sub>NaO<sub>7</sub> [M+Na]<sup>+</sup>: 553.0581, Found: 553.0575.

**1,1'-di-tert-butyl 3-methyl 5'-bromo-2'-oxospiro[aziridine-2,3'-indoline]-1,1',3-tricarboxylate (4n)**

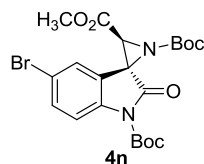

Product **4n** was obtained in 63% yield as a white solid. <sup>1</sup>H NMR (300 MHz, CDCl<sub>3</sub>), δ 7.82 (d, *J* = 8.6 Hz, 1H), 7.56-7.51 (m, 2H), 3.85 (s, 1H), 3.79 (s,

3H), 1.62 (s, 9H), 1.44 (s, 9H); <sup>13</sup>C NMR (75 MHz, CDCl<sub>3</sub>) δ 166.7, 164.9, 156.0, 148.3, 140.3, 133.4, 127.1, 122.2, 118.0, 116.8, 85.4, 84.0, 52.9, 49.5, 48.6, 28.0, 27.4. IR (KBr) ν 3434.1, 2922.7, 2851.2, 1776.1, 1761.9, 1749.9, 1736.9, 1326.3, 1259.6, 1150.1, 826.5, 807.4 cm<sup>-1</sup>. HRMS (ESI) Calcd. for C<sub>21</sub>H<sub>25</sub>BrN<sub>2</sub>NaO<sub>7</sub> [M+Na]<sup>+</sup>: 519.0737, Found: 519.0731.

**1-benzyl 1'-tert-butyl 3-methyl 5'-methyl-2'-oxospiro[aziridine-2,3'-indoline]-1,1',3-tricarboxylate (4o)**

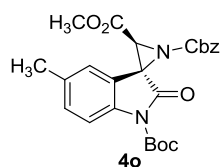

Product **4o** was obtained in 55% yield as a white solid.  $^1\text{H}$  NMR (300 MHz,  $\text{CDCl}_3$ ),  $\delta$  7.80 (d,  $J = 8.8$  Hz, 1H), 7.33 (s, 5H), 7.20 (d,  $J = 5.0$  Hz, 2H), 5.18 (q,  $J = 12.0$  Hz, 2H), 3.90 (s, 1H), 3.76 (s, 3H), 2.32 (s, 3H), 1.64 (s, 9H);  $^{13}\text{C}$  NMR (75 MHz,  $\text{CDCl}_3$ )  $\delta$  167.6, 164.8, 158.0, 148.4, 139.0, 134.8, 131.2, 128.7, 128.5, 128.4, 124.3, 119.5, 115.2, 85.0, 69.3, 52.8, 49.4, 49.2, 28.0, 21.0 (one carbon missing). IR (KBr)  $\nu$  3438.6, 2982.0, 2921.4, 1794.8, 1754.9, 1734.5, 1486.0, 1320.4, 1266.2, 1189.4, 1153.1, 1125.9, 827.5, 800.6, 753.7, 700.5  $\text{cm}^{-1}$ . HRMS (ESI) Calcd. for  $\text{C}_{25}\text{H}_{26}\text{N}_2\text{NaO}_7$   $[\text{M}+\text{Na}]^+$ : 489.1632, Found: 489.1630.

### 1-benzyl 1'-tert-butyl 3-methyl 7'-chloro-2'-oxospiro[aziridine-2,3'-indoline]-1,1',3-tricarboxylate (**4p**)

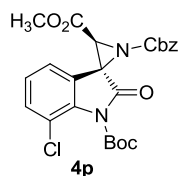

Product **4p** was obtained in 65% yield as a white solid.  $^1\text{H}$  NMR (300 MHz,  $\text{CDCl}_3$ ),  $\delta$  7.40-7.31 (m, 7H), 7.10 (t,  $J = 7.8$  Hz, 1H), 5.17 (q,  $J = 12.0$  Hz, 2H), 3.92 (s, 1H), 3.77 (s, 3H), 1.63 (s, 9H);  $^{13}\text{C}$  NMR (75 MHz,  $\text{CDCl}_3$ )  $\delta$  167.7, 164.6, 157.7, 146.9, 138.2, 134.5, 132.3, 128.7, 128.6, 128.5, 125.6, 122.9, 122.8, 119.1, 86.3, 69.5, 52.9, 49.2, 49.0, 27.6. IR (KBr)  $\nu$  3435.6, 2957.5, 2920.2, 1758.2, 1250.5, IR (KBr)  $\nu$  3435.6, 2957.5, 2920.2, 1758.2, 1250.5, 1227.7, 1172.7, 1139.0, 807.7, 784.1, 755.4, 701.0  $\text{cm}^{-1}$ . HRMS (ESI) Calcd. for  $\text{C}_{24}\text{H}_{23}\text{ClN}_2\text{NaO}_7$   $[\text{M}+\text{Na}]^+$ : 509.1086, Found: 509.1091.

## 7. Experimental data for compounds **5** and **7**

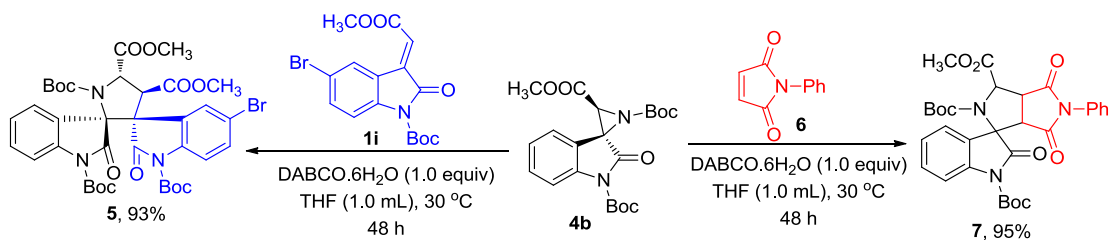

**General procedure:** To a 5.0 mL vial were successively added spiroaziridine oxindole **4b** (0.10 mmol), 5-Br-substituted methyleneindolinone **1i** or N-phenyl maleimide **6**, DABCO·6H<sub>2</sub>O (33.0 mg, 0.10 mmol) and 1.0 mL THF. The reaction was kept at 30 °C till almost full consumption of **4b** by TLC analysis (2 days), and then the reaction mixture was directly subjected to flash column chromatography on silica gel (petroleum ether/ ethyl acetate) to afford the corresponding products **5** or **7**.

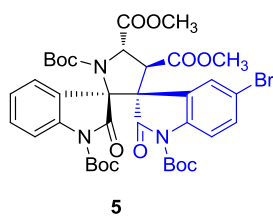

Product **5** was obtained in 93% yield as a white solid.  $^1\text{H}$  NMR (300 MHz,  $\text{CDCl}_3$ ),  $\delta$  7.83 (s, 1H), 7.65-7.60 (m, 2H), 7.43-7.37 (m, 2H), 7.29 (d,  $J = 7.6$  Hz, 1H), 7.23-7.16 (m, 1H), 5.37 (d,  $J = 8.0$  Hz, 1H), 4.20 (d,  $J = 8.1$  Hz, 1H), 3.92 (s, 3H), 3.48 (s, 3H), 1.45 (s, 9H), 1.43 (s, 9H), 1.24 (s, 9H);  $^{13}\text{C}$  NMR (75 MHz,  $\text{CDCl}_3$ )  $\delta$  171.3, 170.0, 169.3, 167.3, 151.6, 148.4, 148.0, 138.3, 138.2, 133.3, 132.8, 129.8, 126.2, 125.4, 124.3, 116.8, 116.0, 114.6, 114.2, 84.7, 82.7, 61.6, 59.8, 52.9, 52.5, 51.7, 48.7, 28.1. IR (KBr)  $\nu$  3445.3, 2980.4, 2954.8, 2926.6, 2852.9, 1779.7, 1736.4, 1713.7, 1477.4, 1370.3, 1346.2, 1297.5, 1250.8, 1152.0, 1105.0, 70.1  $\text{cm}^{-1}$ . HRMS (ESI) Calcd. for  $\text{C}_{37}\text{H}_{42}\text{BrN}_3\text{NaO}_{12}$   $[\text{M}+\text{Na}]^+$ : 822.1844, Found: 822.1848.

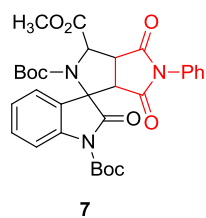

Product **7** was obtained in 95% yield as a white solid.  $^1\text{H}$  NMR (300 MHz,  $\text{CDCl}_3$ ),  $\delta$  7.89-7.84 (m, 2H), 7.47-7.29 (m, 6H), 7.04 (d,  $J = 7.0$  Hz, 1H), 5.19 (dd,  $J_1 = 9.7$  Hz,  $J_2 = 44.6$  Hz, 1H), 4.16-4.00 (m, 1H), 3.89 (d,  $J = 11.1$  Hz, 3H), 3.70 (d,  $J = 8.4$  Hz, 1H), 1.62 (d,  $J = 16.5$  Hz, 9H), 1.07 (d,  $J = 9.5$  Hz, 9H);  $^{13}\text{C}$  NMR (75 MHz,  $\text{CDCl}_3$ )  $\delta$  173.1, 172.5, 172.0, 170.5, 148.6, 139.7, 130.3, 129.9, 129.1, 129.0, 128.9, 126.8, 125.9, 125.4, 124.6, 115.2, 84.9, 84.5, 62.3, 61.7, 53.0, 52.8, 48.0, 28.0. IR (KBr)  $\nu$  3436.0, 2978.8, 2920.6, 2850.9, 1797.9, 1758.7, 1723.6, 1370.7, 1150.1, 754.5  $\text{cm}^{-1}$ . HRMS (ESI) Calcd. for  $\text{C}_{31}\text{H}_{33}\text{N}_3\text{NaO}_9$   $[\text{M}+\text{Na}]^+$ : 614.2109, Found: 614.2110.

## 8. Crystal data for **3a** and **4a**

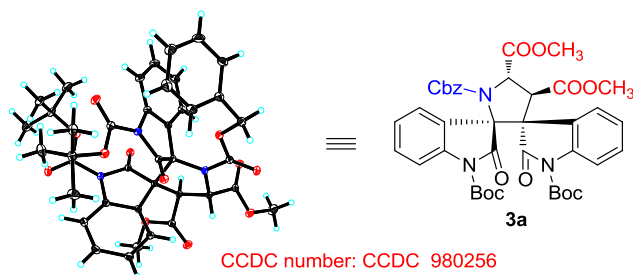

Table 1. Crystal data and structure refinement for compound **3a**.

|                     |                                                     |
|---------------------|-----------------------------------------------------|
| Identification code | <b>3a</b>                                           |
| Empirical formula   | $\text{C}_{40}\text{H}_{41}\text{N}_3\text{O}_{12}$ |



|                                   |                                                                                                                          |
|-----------------------------------|--------------------------------------------------------------------------------------------------------------------------|
| Formula weight                    | 755.76                                                                                                                   |
| Temperature                       | 100(2) K                                                                                                                 |
| Wavelength                        | 0.71073 Å                                                                                                                |
| Crystal system, space group       | Monoclinic, P 21/c                                                                                                       |
| Unit cell dimensions              | a = 10.8958(12) Å    alpha = 90 deg.<br>b = 17.3981(19) Å    beta = 91.143(2) deg.<br>c = 19.868(2) Å    gamma = 90 deg. |
| Volume                            | 3765.6(7) Å <sup>3</sup>                                                                                                 |
| Z, Calculated density             | 4, 1.333 Mg/m <sup>3</sup>                                                                                               |
| Absorption coefficient            | 0.099 mm <sup>-1</sup>                                                                                                   |
| F(000)                            | 1592                                                                                                                     |
| Crystal size                      | 0.44 x 0.35 x 0.35 mm                                                                                                    |
| Theta range for data collection   | 1.56 to 30.10 deg.                                                                                                       |
| Limiting indices                  | -15 ≤ h ≤ 13, -24 ≤ k ≤ 24, -28 ≤ l ≤ 26                                                                                 |
| Reflections collected / unique    | 38954 / 10572 [R(int) = 0.0365]                                                                                          |
| Completeness to theta = 30.10     | 95.4 %                                                                                                                   |
| Absorption correction             | Semi-empirical from equivalents                                                                                          |
| Max. and min. transmission        | 0.9661 and 0.9576                                                                                                        |
| Refinement method                 | Full-matrix least-squares on F <sup>2</sup>                                                                              |
| Data / restraints / parameters    | 10572 / 0 / 504                                                                                                          |
| Goodness-of-fit on F <sup>2</sup> | 1.041                                                                                                                    |
| Final R indices [I > 2σ(I)]       | R1 = 0.0449, wR2 = 0.1174                                                                                                |
| R indices (all data)              | R1 = 0.0597, wR2 = 0.1276                                                                                                |
| Largest diff. peak and hole       | 0.454 and -0.310 e.Å <sup>-3</sup>                                                                                       |

Table 2. Atomic coordinates ( x 10<sup>4</sup>) and equivalent isotropic displacement parameters (Å<sup>2</sup> x 10<sup>3</sup>) for compound **3a**.

U(eq) is defined as one third of the trace of the orthogonalized Uij tensor.

| Atom | x | y | z | U(eq) |
|------|---|---|---|-------|
|------|---|---|---|-------|

|       |         |          |          |       |
|-------|---------|----------|----------|-------|
| O(1)  | 2217(1) | 5932(1)  | 8564(1)  | 23(1) |
| O(2)  | 2284(1) | 9436(1)  | 10126(1) | 19(1) |
| C(39) | 1416(1) | 8719(1)  | 11372(1) | 25(1) |
| C(38) | 627(2)  | 8170(1)  | 11626(1) | 31(1) |
| C(40) | 1857(2) | 4612(1)  | 8153(1)  | 35(1) |
| O(6)  | 3682(1) | 5282(1)  | 9162(1)  | 28(1) |
| O(7)  | 2955(1) | 7284(1)  | 8061(1)  | 19(1) |
| O(8)  | 3918(1) | 8129(1)  | 10546(1) | 18(1) |
| O(9)  | 1007(1) | 6553(1)  | 10566(1) | 23(1) |
| O(10) | 2969(1) | 6775(1)  | 10922(1) | 21(1) |
| O(11) | 3420(1) | 10125(1) | 8185(1)  | 22(1) |
| O(12) | 5432(1) | 10373(1) | 8358(1)  | 26(1) |
| O(3)  | 5851(1) | 7679(1)  | 7873(1)  | 23(1) |
| O(4)  | 6764(1) | 8777(1)  | 8206(1)  | 27(1) |
| O(5)  | 3630(1) | 10359(1) | 9793(1)  | 20(1) |
| N(1)  | 3893(1) | 6563(1)  | 8925(1)  | 17(1) |
| N(2)  | 3644(1) | 9145(1)  | 9359(1)  | 16(1) |
| N(3)  | 2153(1) | 7517(1)  | 10111(1) | 15(1) |
| C(1)  | 257(2)  | 5647(1)  | 8134(1)  | 35(1) |
| C(2)  | 1311(1) | 5287(1)  | 8531(1)  | 22(1) |
| C(3)  | 3270(1) | 5851(1)  | 8895(1)  | 18(1) |
| C(4)  | 3566(1) | 7239(1)  | 8566(1)  | 15(1) |
| C(5)  | 4183(1) | 7913(1)  | 8946(1)  | 13(1) |
| C(6)  | 3192(1) | 8361(1)  | 9380(1)  | 13(1) |
| C(7)  | 3224(1) | 9710(1)  | 9772(1)  | 16(1) |
| C(8)  | 1822(1) | 9893(1)  | 10683(1) | 22(1) |
| C(9)  | 949(1)  | 9355(1)  | 11021(1) | 20(1) |
| C(10) | -629(2) | 8252(1)  | 11526(1) | 36(1) |
| C(11) | 928(1)  | 5086(1)  | 9238(1)  | 26(1) |
| C(12) | 4910(1) | 6721(1)  | 9372(1)  | 16(1) |

|       |          |          |          |       |
|-------|----------|----------|----------|-------|
| C(13) | 5149(1)  | 7511(1)  | 9372(1)  | 15(1) |
| C(14) | 1872(1)  | 8252(1)  | 9158(1)  | 15(1) |
| C(15) | 1209(1)  | 8612(1)  | 8647(1)  | 18(1) |
| C(16) | -33(1)   | 8438(1)  | 8566(1)  | 22(1) |
| C(17) | -587(1)  | 7915(1)  | 8995(1)  | 24(1) |
| C(18) | 66(1)    | 7555(1)  | 9516(1)  | 21(1) |
| C(19) | 1301(1)  | 7737(1)  | 9590(1)  | 15(1) |
| C(20) | 3193(1)  | 8008(1)  | 10100(1) | 14(1) |
| C(21) | 1959(1)  | 6903(1)  | 10558(1) | 17(1) |
| C(22) | 3061(1)  | 6092(1)  | 11368(1) | 21(1) |
| C(23) | 4381(1)  | 6149(1)  | 11625(1) | 29(1) |
| C(24) | 2159(1)  | 6166(1)  | 11939(1) | 22(1) |
| C(25) | 2863(2)  | 5362(1)  | 10958(1) | 29(1) |
| C(26) | 4646(1)  | 9286(1)  | 8900(1)  | 14(1) |
| C(27) | 4396(1)  | 9983(1)  | 8450(1)  | 16(1) |
| C(28) | 5348(2)  | 11029(1) | 7908(1)  | 37(1) |
| C(29) | 4643(1)  | 8546(1)  | 8476(1)  | 14(1) |
| C(30) | 5881(1)  | 8366(1)  | 8179(1)  | 17(1) |
| C(31) | 6971(1)  | 7462(1)  | 7539(1)  | 32(1) |
| C(32) | -312(1)  | 9435(1)  | 10942(1) | 26(1) |
| C(33) | -1101(1) | 8880(1)  | 11196(1) | 36(1) |
| C(34) | 6115(1)  | 7811(1)  | 9751(1)  | 18(1) |
| C(35) | 6846(1)  | 7307(1)  | 10132(1) | 21(1) |
| C(36) | 6584(1)  | 6526(1)  | 10136(1) | 24(1) |
| C(37) | 5611(1)  | 6216(1)  | 9758(1)  | 22(1) |

---

Table 3. Bond lengths [Å] and angles [deg] for compound **3a**.

---

|           |            |
|-----------|------------|
| O(1)-C(3) | 1.3186(16) |
| O(1)-C(2) | 1.4953(15) |

|              |            |
|--------------|------------|
| O(2)-C(7)    | 1.3418(15) |
| O(2)-C(8)    | 1.4592(15) |
| C(39)-C(38)  | 1.388(2)   |
| C(39)-C(9)   | 1.3978(19) |
| C(39)-H(39)  | 0.9500     |
| C(38)-C(10)  | 1.386(2)   |
| C(38)-H(38)  | 0.9500     |
| C(40)-C(2)   | 1.522(2)   |
| C(40)-H(40A) | 0.9800     |
| C(40)-H(40B) | 0.9800     |
| C(40)-H(40C) | 0.9800     |
| O(6)-C(3)    | 1.2056(16) |
| O(7)-C(4)    | 1.1963(15) |
| O(8)-C(20)   | 1.1937(15) |
| O(9)-C(21)   | 1.2039(16) |
| O(10)-C(21)  | 1.3237(15) |
| O(10)-C(22)  | 1.4849(15) |
| O(11)-C(27)  | 1.2023(16) |
| O(12)-C(27)  | 1.3331(15) |
| O(12)-C(28)  | 1.4515(16) |
| O(3)-C(30)   | 1.3415(15) |
| O(3)-C(31)   | 1.4498(16) |
| O(4)-C(30)   | 1.1996(16) |
| O(5)-C(7)    | 1.2123(15) |
| N(1)-C(3)    | 1.4130(15) |
| N(1)-C(4)    | 1.4173(15) |
| N(1)-C(12)   | 1.4320(16) |
| N(2)-C(7)    | 1.3654(15) |
| N(2)-C(6)    | 1.4514(14) |
| N(2)-C(26)   | 1.4582(15) |

|              |            |
|--------------|------------|
| N(3)-C(21)   | 1.4069(15) |
| N(3)-C(20)   | 1.4196(15) |
| N(3)-C(19)   | 1.4299(16) |
| C(1)-C(2)    | 1.516(2)   |
| C(1)-H(1A)   | 0.9800     |
| C(1)-H(1B)   | 0.9800     |
| C(1)-H(1C)   | 0.9800     |
| C(2)-C(11)   | 1.5133(19) |
| C(4)-C(5)    | 1.5411(16) |
| C(5)-C(13)   | 1.5089(16) |
| C(5)-C(29)   | 1.5356(16) |
| C(5)-C(6)    | 1.5969(16) |
| C(6)-C(14)   | 1.5089(16) |
| C(6)-C(20)   | 1.5571(16) |
| C(8)-C(9)    | 1.5026(19) |
| C(8)-H(8A)   | 0.9900     |
| C(8)-H(8B)   | 0.9900     |
| C(9)-C(32)   | 1.3868(19) |
| C(10)-C(33)  | 1.370(3)   |
| C(10)-H(10)  | 0.9500     |
| C(11)-H(11A) | 0.9800     |
| C(11)-H(11B) | 0.9800     |
| C(11)-H(11C) | 0.9800     |
| C(12)-C(37)  | 1.3859(18) |
| C(12)-C(13)  | 1.3990(16) |
| C(13)-C(34)  | 1.3835(17) |
| C(14)-C(15)  | 1.3841(17) |
| C(14)-C(19)  | 1.3948(16) |
| C(15)-C(16)  | 1.3930(18) |
| C(15)-H(15)  | 0.9500     |

|              |            |
|--------------|------------|
| C(16)-C(17)  | 1.3913(19) |
| C(16)-H(16)  | 0.9500     |
| C(17)-C(18)  | 1.3948(19) |
| C(17)-H(17)  | 0.9500     |
| C(18)-C(19)  | 1.3875(17) |
| C(18)-H(18)  | 0.9500     |
| C(22)-C(23)  | 1.520(2)   |
| C(22)-C(24)  | 1.5212(18) |
| C(22)-C(25)  | 1.5228(19) |
| C(23)-H(23A) | 0.9800     |
| C(23)-H(23B) | 0.9800     |
| C(23)-H(23C) | 0.9800     |
| C(24)-H(24A) | 0.9800     |
| C(24)-H(24B) | 0.9800     |
| C(24)-H(24C) | 0.9800     |
| C(25)-H(25A) | 0.9800     |
| C(25)-H(25B) | 0.9800     |
| C(25)-H(25C) | 0.9800     |
| C(26)-C(27)  | 1.5276(16) |
| C(26)-C(29)  | 1.5377(16) |
| C(26)-H(26)  | 1.0000     |
| C(28)-H(28A) | 0.9800     |
| C(28)-H(28B) | 0.9800     |
| C(28)-H(28C) | 0.9800     |
| C(29)-C(30)  | 1.5162(17) |
| C(29)-H(29)  | 1.0000     |
| C(31)-H(31A) | 0.9800     |
| C(31)-H(31B) | 0.9800     |
| C(31)-H(31C) | 0.9800     |
| C(32)-C(33)  | 1.394(2)   |

|                     |            |
|---------------------|------------|
| C(32)-H(32)         | 0.9500     |
| C(33)-H(33)         | 0.9500     |
| C(34)-C(35)         | 1.3972(18) |
| C(34)-H(34)         | 0.9500     |
| C(35)-C(36)         | 1.3880(19) |
| C(35)-H(35)         | 0.9500     |
| C(36)-C(37)         | 1.396(2)   |
| C(36)-H(36)         | 0.9500     |
| C(37)-H(37)         | 0.9500     |
| C(3)-O(1)-C(2)      | 120.53(10) |
| C(7)-O(2)-C(8)      | 118.87(10) |
| C(38)-C(39)-C(9)    | 120.29(13) |
| C(38)-C(39)-H(39)   | 119.9      |
| C(9)-C(39)-H(39)    | 119.9      |
| C(10)-C(38)-C(39)   | 119.61(14) |
| C(10)-C(38)-H(38)   | 120.2      |
| C(39)-C(38)-H(38)   | 120.2      |
| C(2)-C(40)-H(40A)   | 109.5      |
| C(2)-C(40)-H(40B)   | 109.5      |
| H(40A)-C(40)-H(40B) | 109.5      |
| C(2)-C(40)-H(40C)   | 109.5      |
| H(40A)-C(40)-H(40C) | 109.5      |
| H(40B)-C(40)-H(40C) | 109.5      |
| C(21)-O(10)-C(22)   | 120.41(10) |
| C(27)-O(12)-C(28)   | 116.16(11) |
| C(30)-O(3)-C(31)    | 115.20(11) |
| C(3)-N(1)-C(4)      | 126.17(11) |
| C(3)-N(1)-C(12)     | 124.06(10) |
| C(4)-N(1)-C(12)     | 109.60(10) |
| C(7)-N(2)-C(6)      | 122.83(10) |

|                  |            |
|------------------|------------|
| C(7)-N(2)-C(26)  | 121.29(10) |
| C(6)-N(2)-C(26)  | 115.75(9)  |
| C(21)-N(3)-C(20) | 126.63(10) |
| C(21)-N(3)-C(19) | 123.87(10) |
| C(20)-N(3)-C(19) | 109.50(10) |
| C(2)-C(1)-H(1A)  | 109.5      |
| C(2)-C(1)-H(1B)  | 109.5      |
| H(1A)-C(1)-H(1B) | 109.5      |
| C(2)-C(1)-H(1C)  | 109.5      |
| H(1A)-C(1)-H(1C) | 109.5      |
| H(1B)-C(1)-H(1C) | 109.5      |
| O(1)-C(2)-C(11)  | 109.14(11) |
| O(1)-C(2)-C(1)   | 101.82(11) |
| C(11)-C(2)-C(1)  | 110.94(13) |
| O(1)-C(2)-C(40)  | 109.68(11) |
| C(11)-C(2)-C(40) | 113.39(12) |
| C(1)-C(2)-C(40)  | 111.23(13) |
| O(6)-C(3)-O(1)   | 128.30(12) |
| O(6)-C(3)-N(1)   | 121.79(12) |
| O(1)-C(3)-N(1)   | 109.87(10) |
| O(7)-C(4)-N(1)   | 127.29(11) |
| O(7)-C(4)-C(5)   | 126.31(11) |
| N(1)-C(4)-C(5)   | 106.39(10) |
| C(13)-C(5)-C(29) | 116.15(10) |
| C(13)-C(5)-C(4)  | 102.41(9)  |
| C(29)-C(5)-C(4)  | 113.07(9)  |
| C(13)-C(5)-C(6)  | 113.27(9)  |
| C(29)-C(5)-C(6)  | 102.15(9)  |
| C(4)-C(5)-C(6)   | 110.06(9)  |
| N(2)-C(6)-C(14)  | 115.60(10) |



|                     |            |
|---------------------|------------|
| N(2)-C(6)-C(20)     | 113.75(9)  |
| C(14)-C(6)-C(20)    | 101.68(9)  |
| N(2)-C(6)-C(5)      | 102.14(9)  |
| C(14)-C(6)-C(5)     | 115.56(9)  |
| C(20)-C(6)-C(5)     | 108.36(9)  |
| O(5)-C(7)-O(2)      | 126.46(11) |
| O(5)-C(7)-N(2)      | 124.36(11) |
| O(2)-C(7)-N(2)      | 109.16(10) |
| O(2)-C(8)-C(9)      | 103.30(10) |
| O(2)-C(8)-H(8A)     | 111.1      |
| C(9)-C(8)-H(8A)     | 111.1      |
| O(2)-C(8)-H(8B)     | 111.1      |
| C(9)-C(8)-H(8B)     | 111.1      |
| H(8A)-C(8)-H(8B)    | 109.1      |
| C(32)-C(9)-C(39)    | 119.11(13) |
| C(32)-C(9)-C(8)     | 121.44(13) |
| C(39)-C(9)-C(8)     | 119.19(12) |
| C(33)-C(10)-C(38)   | 120.70(15) |
| C(33)-C(10)-H(10)   | 119.6      |
| C(38)-C(10)-H(10)   | 119.6      |
| C(2)-C(11)-H(11A)   | 109.5      |
| C(2)-C(11)-H(11B)   | 109.5      |
| H(11A)-C(11)-H(11B) | 109.5      |
| C(2)-C(11)-H(11C)   | 109.5      |
| H(11A)-C(11)-H(11C) | 109.5      |
| H(11B)-C(11)-H(11C) | 109.5      |
| C(37)-C(12)-C(13)   | 121.44(12) |
| C(37)-C(12)-N(1)    | 129.21(11) |
| C(13)-C(12)-N(1)    | 109.34(10) |
| C(34)-C(13)-C(12)   | 120.68(11) |

|                   |            |
|-------------------|------------|
| C(34)-C(13)-C(5)  | 130.19(11) |
| C(12)-C(13)-C(5)  | 109.06(10) |
| C(15)-C(14)-C(19) | 120.63(11) |
| C(15)-C(14)-C(6)  | 129.68(11) |
| C(19)-C(14)-C(6)  | 109.55(10) |
| C(14)-C(15)-C(16) | 118.52(12) |
| C(14)-C(15)-H(15) | 120.7      |
| C(16)-C(15)-H(15) | 120.7      |
| C(17)-C(16)-C(15) | 120.28(12) |
| C(17)-C(16)-H(16) | 119.9      |
| C(15)-C(16)-H(16) | 119.9      |
| C(16)-C(17)-C(18) | 121.82(12) |
| C(16)-C(17)-H(17) | 119.1      |
| C(18)-C(17)-H(17) | 119.1      |
| C(19)-C(18)-C(17) | 117.06(12) |
| C(19)-C(18)-H(18) | 121.5      |
| C(17)-C(18)-H(18) | 121.5      |
| C(18)-C(19)-C(14) | 121.68(11) |
| C(18)-C(19)-N(3)  | 128.97(11) |
| C(14)-C(19)-N(3)  | 109.12(10) |
| O(8)-C(20)-N(3)   | 127.65(11) |
| O(8)-C(20)-C(6)   | 126.92(11) |
| N(3)-C(20)-C(6)   | 105.44(9)  |
| O(9)-C(21)-O(10)  | 127.96(12) |
| O(9)-C(21)-N(3)   | 122.22(12) |
| O(10)-C(21)-N(3)  | 109.78(10) |
| O(10)-C(22)-C(23) | 101.57(10) |
| O(10)-C(22)-C(24) | 109.93(10) |
| C(23)-C(22)-C(24) | 111.39(11) |
| O(10)-C(22)-C(25) | 109.95(10) |

|                     |            |
|---------------------|------------|
| C(23)-C(22)-C(25)   | 110.95(12) |
| C(24)-C(22)-C(25)   | 112.51(12) |
| C(22)-C(23)-H(23A)  | 109.5      |
| C(22)-C(23)-H(23B)  | 109.5      |
| H(23A)-C(23)-H(23B) | 109.5      |
| C(22)-C(23)-H(23C)  | 109.5      |
| H(23A)-C(23)-H(23C) | 109.5      |
| H(23B)-C(23)-H(23C) | 109.5      |
| C(22)-C(24)-H(24A)  | 109.5      |
| C(22)-C(24)-H(24B)  | 109.5      |
| H(24A)-C(24)-H(24B) | 109.5      |
| C(22)-C(24)-H(24C)  | 109.5      |
| H(24A)-C(24)-H(24C) | 109.5      |
| H(24B)-C(24)-H(24C) | 109.5      |
| C(22)-C(25)-H(25A)  | 109.5      |
| C(22)-C(25)-H(25B)  | 109.5      |
| H(25A)-C(25)-H(25B) | 109.5      |
| C(22)-C(25)-H(25C)  | 109.5      |
| H(25A)-C(25)-H(25C) | 109.5      |
| H(25B)-C(25)-H(25C) | 109.5      |
| N(2)-C(26)-C(27)    | 111.89(10) |
| N(2)-C(26)-C(29)    | 102.03(9)  |
| C(27)-C(26)-C(29)   | 110.20(9)  |
| N(2)-C(26)-H(26)    | 110.8      |
| C(27)-C(26)-H(26)   | 110.8      |
| C(29)-C(26)-H(26)   | 110.8      |
| O(11)-C(27)-O(12)   | 125.44(12) |
| O(11)-C(27)-C(26)   | 124.41(11) |
| O(12)-C(27)-C(26)   | 109.99(10) |
| O(12)-C(28)-H(28A)  | 109.5      |

|                     |            |
|---------------------|------------|
| O(12)-C(28)-H(28B)  | 109.5      |
| H(28A)-C(28)-H(28B) | 109.5      |
| O(12)-C(28)-H(28C)  | 109.5      |
| H(28A)-C(28)-H(28C) | 109.5      |
| H(28B)-C(28)-H(28C) | 109.5      |
| C(30)-C(29)-C(5)    | 113.13(10) |
| C(30)-C(29)-C(26)   | 113.19(10) |
| C(5)-C(29)-C(26)    | 105.35(9)  |
| C(30)-C(29)-H(29)   | 108.3      |
| C(5)-C(29)-H(29)    | 108.3      |
| C(26)-C(29)-H(29)   | 108.3      |
| O(4)-C(30)-O(3)     | 124.35(12) |
| O(4)-C(30)-C(29)    | 125.34(11) |
| O(3)-C(30)-C(29)    | 110.31(10) |
| O(3)-C(31)-H(31A)   | 109.5      |
| O(3)-C(31)-H(31B)   | 109.5      |
| H(31A)-C(31)-H(31B) | 109.5      |
| O(3)-C(31)-H(31C)   | 109.5      |
| H(31A)-C(31)-H(31C) | 109.5      |
| H(31B)-C(31)-H(31C) | 109.5      |
| C(9)-C(32)-C(33)    | 120.35(14) |
| C(9)-C(32)-H(32)    | 119.8      |
| C(33)-C(32)-H(32)   | 119.8      |
| C(10)-C(33)-C(32)   | 119.90(15) |
| C(10)-C(33)-H(33)   | 120.1      |
| C(32)-C(33)-H(33)   | 120.1      |
| C(13)-C(34)-C(35)   | 118.52(12) |
| C(13)-C(34)-H(34)   | 120.7      |
| C(35)-C(34)-H(34)   | 120.7      |
| C(36)-C(35)-C(34)   | 120.17(12) |

|                   |            |
|-------------------|------------|
| C(36)-C(35)-H(35) | 119.9      |
| C(34)-C(35)-H(35) | 119.9      |
| C(35)-C(36)-C(37) | 121.90(12) |
| C(35)-C(36)-H(36) | 119.1      |
| C(37)-C(36)-H(36) | 119.1      |
| C(12)-C(37)-C(36) | 117.26(12) |
| C(12)-C(37)-H(37) | 121.4      |
| C(36)-C(37)-H(37) | 121.4      |

---

Table 4. Anisotropic displacement parameters ( $\text{\AA}^2 \times 10^3$ ) for compound **3a**.

The anisotropic displacement factor exponent takes the form:  $-2 \pi^2 [ h^2 a^{*2} U_{11} + \dots + 2 h k a^* b^* U_{12} ]$

| Atom  | U <sub>11</sub> | U <sub>22</sub> | U <sub>33</sub> | U <sub>23</sub> | U <sub>13</sub> | U <sub>12</sub> |
|-------|-----------------|-----------------|-----------------|-----------------|-----------------|-----------------|
| O(1)  | 23(1)           | 19(1)           | 26(1)           | 4(1)            | -3(1)           | -7(1)           |
| O(2)  | 20(1)           | 18(1)           | 20(1)           | -4(1)           | 7(1)            | -2(1)           |
| C(39) | 23(1)           | 30(1)           | 21(1)           | 0(1)            | 5(1)            | 5(1)            |
| C(38) | 40(1)           | 28(1)           | 27(1)           | 3(1)            | 14(1)           | 6(1)            |
| C(40) | 40(1)           | 32(1)           | 32(1)           | -14(1)          | 5(1)            | -11(1)          |
| O(6)  | 30(1)           | 15(1)           | 38(1)           | 2(1)            | -4(1)           | -1(1)           |
| O(7)  | 21(1)           | 19(1)           | 16(1)           | -1(1)           | 0(1)            | -2(1)           |
| O(8)  | 18(1)           | 21(1)           | 15(1)           | -2(1)           | -1(1)           | -2(1)           |
| O(9)  | 23(1)           | 24(1)           | 23(1)           | 6(1)            | -1(1)           | -8(1)           |
| O(10) | 21(1)           | 24(1)           | 18(1)           | 8(1)            | -2(1)           | -2(1)           |
| O(11) | 21(1)           | 23(1)           | 22(1)           | 4(1)            | -3(1)           | 1(1)            |
| O(12) | 22(1)           | 22(1)           | 34(1)           | 15(1)           | -4(1)           | -6(1)           |
| O(3)  | 18(1)           | 23(1)           | 27(1)           | -8(1)           | 6(1)            | 0(1)            |
| O(4)  | 20(1)           | 27(1)           | 34(1)           | -6(1)           | 9(1)            | -6(1)           |

|       |       |       |       |       |        |        |
|-------|-------|-------|-------|-------|--------|--------|
| O(5)  | 23(1) | 14(1) | 21(1) | -2(1) | 0(1)   | -2(1)  |
| N(1)  | 19(1) | 13(1) | 18(1) | 0(1)  | 0(1)   | -1(1)  |
| N(2)  | 18(1) | 12(1) | 16(1) | -1(1) | 4(1)   | -3(1)  |
| N(3)  | 14(1) | 18(1) | 13(1) | 2(1)  | 0(1)   | -3(1)  |
| C(1)  | 32(1) | 36(1) | 37(1) | 11(1) | -10(1) | -14(1) |
| C(2)  | 25(1) | 20(1) | 22(1) | 0(1)  | 0(1)   | -10(1) |
| C(3)  | 22(1) | 16(1) | 18(1) | -2(1) | 3(1)   | -2(1)  |
| C(4)  | 16(1) | 14(1) | 15(1) | -1(1) | 4(1)   | -1(1)  |
| C(5)  | 14(1) | 12(1) | 13(1) | 0(1)  | 2(1)   | -1(1)  |
| C(6)  | 14(1) | 12(1) | 13(1) | 0(1)  | 2(1)   | -1(1)  |
| C(7)  | 17(1) | 16(1) | 14(1) | 0(1)  | 0(1)   | 1(1)   |
| C(8)  | 23(1) | 21(1) | 21(1) | -7(1) | 7(1)   | 0(1)   |
| C(9)  | 20(1) | 23(1) | 17(1) | -5(1) | 4(1)   | 1(1)   |
| C(10) | 34(1) | 33(1) | 42(1) | -4(1) | 20(1)  | -7(1)  |
| C(11) | 29(1) | 26(1) | 22(1) | 2(1)  | 3(1)   | -7(1)  |
| C(12) | 17(1) | 16(1) | 16(1) | -1(1) | 2(1)   | 1(1)   |
| C(13) | 15(1) | 15(1) | 14(1) | 1(1)  | 2(1)   | 1(1)   |
| C(14) | 14(1) | 16(1) | 14(1) | -1(1) | 2(1)   | 0(1)   |
| C(15) | 18(1) | 20(1) | 16(1) | 1(1)  | 2(1)   | 1(1)   |
| C(16) | 19(1) | 29(1) | 18(1) | 2(1)  | -2(1)  | 4(1)   |
| C(17) | 15(1) | 33(1) | 25(1) | 1(1)  | -2(1)  | -2(1)  |
| C(18) | 17(1) | 26(1) | 20(1) | 2(1)  | 2(1)   | -4(1)  |
| C(19) | 15(1) | 18(1) | 13(1) | 0(1)  | 1(1)   | 0(1)   |
| C(20) | 15(1) | 14(1) | 14(1) | -1(1) | 2(1)   | 0(1)   |
| C(21) | 20(1) | 18(1) | 13(1) | 1(1)  | 2(1)   | -2(1)  |
| C(22) | 27(1) | 21(1) | 14(1) | 4(1)  | 0(1)   | 1(1)   |
| C(23) | 26(1) | 39(1) | 22(1) | 9(1)  | -2(1)  | 4(1)   |
| C(24) | 29(1) | 22(1) | 16(1) | 2(1)  | 2(1)   | 0(1)   |
| C(25) | 44(1) | 24(1) | 20(1) | -1(1) | 1(1)   | 7(1)   |
| C(26) | 15(1) | 14(1) | 14(1) | 1(1)  | 1(1)   | -1(1)  |

|       |       |       |       |        |       |        |
|-------|-------|-------|-------|--------|-------|--------|
| C(27) | 18(1) | 15(1) | 16(1) | 0(1)   | 2(1)  | 0(1)   |
| C(28) | 38(1) | 31(1) | 43(1) | 23(1)  | -9(1) | -10(1) |
| C(29) | 15(1) | 14(1) | 14(1) | 0(1)   | 2(1)  | -1(1)  |
| C(30) | 17(1) | 19(1) | 15(1) | 1(1)   | 2(1)  | 0(1)   |
| C(31) | 22(1) | 36(1) | 38(1) | -14(1) | 11(1) | 1(1)   |
| C(32) | 21(1) | 28(1) | 29(1) | -3(1)  | 4(1)  | 5(1)   |
| C(33) | 19(1) | 43(1) | 45(1) | -8(1)  | 10(1) | -2(1)  |
| C(34) | 17(1) | 18(1) | 18(1) | 1(1)   | 0(1)  | 0(1)   |
| C(35) | 16(1) | 24(1) | 24(1) | 0(1)   | -2(1) | 2(1)   |
| C(36) | 21(1) | 22(1) | 28(1) | 5(1)   | -3(1) | 5(1)   |
| C(37) | 22(1) | 16(1) | 27(1) | 2(1)   | 0(1)  | 3(1)   |

Table 5. Hydrogen coordinates ( $\times 10^4$ ) and isotropic displacement parameters ( $\text{\AA}^2 \times 10^3$ ) for compound **3a**.

| Atom   | x     | y     | z     | U(eq) |
|--------|-------|-------|-------|-------|
| H(39)  | 2278  | 8664  | 11437 | 30    |
| H(38)  | 946   | 7739  | 11866 | 37    |
| H(40A) | 2111  | 4782  | 7707  | 52    |
| H(40B) | 1240  | 4205  | 8104  | 52    |
| H(40C) | 2572  | 4414  | 8405  | 52    |
| H(1A)  | -18   | 6112  | 8365  | 53    |
| H(1B)  | -424  | 5281  | 8099  | 53    |
| H(1C)  | 531   | 5782  | 7682  | 53    |
| H(8A)  | 1393  | 10359 | 10516 | 26    |
| H(8B)  | 2498  | 10048 | 10995 | 26    |
| H(10)  | -1168 | 7868  | 11688 | 43    |
| H(11A) | 1638  | 4888  | 9494  | 39    |
| H(11B) | 284   | 4692  | 9217  | 39    |

|        |       |       |       |    |
|--------|-------|-------|-------|----|
| H(11C) | 613   | 5547  | 9459  | 39 |
| H(15)  | 1592  | 8970  | 8357  | 22 |
| H(16)  | -504  | 8676  | 8217  | 27 |
| H(17)  | -1434 | 7801  | 8930  | 29 |
| H(18)  | -318  | 7201  | 9809  | 25 |
| H(23A) | 4938  | 6109  | 11246 | 44 |
| H(23B) | 4550  | 5731  | 11945 | 44 |
| H(23C) | 4506  | 6644  | 11852 | 44 |
| H(24A) | 2316  | 6646  | 12184 | 33 |
| H(24B) | 2261  | 5729  | 12247 | 33 |
| H(24C) | 1319  | 6169  | 11754 | 33 |
| H(25A) | 1994  | 5318  | 10826 | 44 |
| H(25B) | 3105  | 4915  | 11230 | 44 |
| H(25C) | 3362  | 5383  | 10553 | 44 |
| H(26)  | 5443  | 9346  | 9153  | 17 |
| H(28A) | 4798  | 10905 | 7527  | 56 |
| H(28B) | 6166  | 11152 | 7742  | 56 |
| H(28C) | 5023  | 11472 | 8151  | 56 |
| H(29)  | 4031  | 8609  | 8098  | 17 |
| H(31A) | 7104  | 7806  | 7157  | 48 |
| H(31B) | 6900  | 6932  | 7377  | 48 |
| H(31C) | 7666  | 7502  | 7858  | 48 |
| H(32)  | -640  | 9871  | 10713 | 31 |
| H(33)  | -1964 | 8938  | 11142 | 43 |
| H(34)  | 6278  | 8347  | 9751  | 21 |
| H(35)  | 7523  | 7499  | 10389 | 26 |
| H(36)  | 7082  | 6193  | 10404 | 29 |
| H(37)  | 5436  | 5681  | 9765  | 26 |

---

Table 6. Torsion angles [deg] for compound **3a**.



---

|                        |             |
|------------------------|-------------|
| C(9)-C(39)-C(38)-C(10) | 0.3(2)      |
| C(3)-O(1)-C(2)-C(11)   | 60.54(16)   |
| C(3)-O(1)-C(2)-C(1)    | 177.88(12)  |
| C(3)-O(1)-C(2)-C(40)   | -64.24(16)  |
| C(2)-O(1)-C(3)-O(6)    | 5.2(2)      |
| C(2)-O(1)-C(3)-N(1)    | -172.59(10) |
| C(4)-N(1)-C(3)-O(6)    | 172.11(12)  |
| C(12)-N(1)-C(3)-O(6)   | -12.99(19)  |
| C(4)-N(1)-C(3)-O(1)    | -9.91(17)   |
| C(12)-N(1)-C(3)-O(1)   | 164.99(11)  |
| C(3)-N(1)-C(4)-O(7)    | -21.9(2)    |
| C(12)-N(1)-C(4)-O(7)   | 162.58(12)  |
| C(3)-N(1)-C(4)-C(5)    | 159.50(11)  |
| C(12)-N(1)-C(4)-C(5)   | -16.02(12)  |
| O(7)-C(4)-C(5)-C(13)   | -160.90(12) |
| N(1)-C(4)-C(5)-C(13)   | 17.73(11)   |
| O(7)-C(4)-C(5)-C(29)   | -35.14(16)  |
| N(1)-C(4)-C(5)-C(29)   | 143.48(10)  |
| O(7)-C(4)-C(5)-C(6)    | 78.38(14)   |
| N(1)-C(4)-C(5)-C(6)    | -103.00(11) |
| C(7)-N(2)-C(6)-C(14)   | 66.91(15)   |
| C(26)-N(2)-C(6)-C(14)  | -117.23(11) |
| C(7)-N(2)-C(6)-C(20)   | -50.23(15)  |
| C(26)-N(2)-C(6)-C(20)  | 125.63(11)  |
| C(7)-N(2)-C(6)-C(5)    | -166.76(11) |
| C(26)-N(2)-C(6)-C(5)   | 9.09(13)    |
| C(13)-C(5)-C(6)-N(2)   | 98.63(11)   |
| C(29)-C(5)-C(6)-N(2)   | -27.06(11)  |
| C(4)-C(5)-C(6)-N(2)    | -147.42(9)  |

|                         |             |
|-------------------------|-------------|
| C(13)-C(5)-C(6)-C(14)   | -135.02(10) |
| C(29)-C(5)-C(6)-C(14)   | 99.30(11)   |
| C(4)-C(5)-C(6)-C(14)    | -21.06(13)  |
| C(13)-C(5)-C(6)-C(20)   | -21.74(13)  |
| C(29)-C(5)-C(6)-C(20)   | -147.43(9)  |
| C(4)-C(5)-C(6)-C(20)    | 92.22(11)   |
| C(8)-O(2)-C(7)-O(5)     | -12.21(19)  |
| C(8)-O(2)-C(7)-N(2)     | 169.60(11)  |
| C(6)-N(2)-C(7)-O(5)     | 175.71(12)  |
| C(26)-N(2)-C(7)-O(5)    | 0.08(19)    |
| C(6)-N(2)-C(7)-O(2)     | -6.05(16)   |
| C(26)-N(2)-C(7)-O(2)    | 178.32(10)  |
| C(7)-O(2)-C(8)-C(9)     | -170.81(11) |
| C(38)-C(39)-C(9)-C(32)  | 1.3(2)      |
| C(38)-C(39)-C(9)-C(8)   | -173.04(13) |
| O(2)-C(8)-C(9)-C(32)    | -104.28(14) |
| O(2)-C(8)-C(9)-C(39)    | 69.88(15)   |
| C(39)-C(38)-C(10)-C(33) | -1.9(2)     |
| C(3)-N(1)-C(12)-C(37)   | 12.4(2)     |
| C(4)-N(1)-C(12)-C(37)   | -171.92(12) |
| C(3)-N(1)-C(12)-C(13)   | -168.15(11) |
| C(4)-N(1)-C(12)-C(13)   | 7.48(13)    |
| C(37)-C(12)-C(13)-C(34) | 1.31(19)    |
| N(1)-C(12)-C(13)-C(34)  | -178.15(11) |
| C(37)-C(12)-C(13)-C(5)  | -175.91(11) |
| N(1)-C(12)-C(13)-C(5)   | 4.63(13)    |
| C(29)-C(5)-C(13)-C(34)  | 45.81(17)   |
| C(4)-C(5)-C(13)-C(34)   | 169.52(12)  |
| C(6)-C(5)-C(13)-C(34)   | -71.99(16)  |
| C(29)-C(5)-C(13)-C(12)  | -137.33(11) |

|                         |             |
|-------------------------|-------------|
| C(4)-C(5)-C(13)-C(12)   | -13.61(12)  |
| C(6)-C(5)-C(13)-C(12)   | 104.87(11)  |
| N(2)-C(6)-C(14)-C(15)   | 37.60(17)   |
| C(20)-C(6)-C(14)-C(15)  | 161.32(12)  |
| C(5)-C(6)-C(14)-C(15)   | -81.59(15)  |
| N(2)-C(6)-C(14)-C(19)   | -137.99(10) |
| C(20)-C(6)-C(14)-C(19)  | -14.27(12)  |
| C(5)-C(6)-C(14)-C(19)   | 102.82(11)  |
| C(19)-C(14)-C(15)-C(16) | -1.25(18)   |
| C(6)-C(14)-C(15)-C(16)  | -176.42(12) |
| C(14)-C(15)-C(16)-C(17) | 0.3(2)      |
| C(15)-C(16)-C(17)-C(18) | 0.4(2)      |
| C(16)-C(17)-C(18)-C(19) | -0.3(2)     |
| C(17)-C(18)-C(19)-C(14) | -0.63(19)   |
| C(17)-C(18)-C(19)-N(3)  | 173.33(12)  |
| C(15)-C(14)-C(19)-C(18) | 1.43(19)    |
| C(6)-C(14)-C(19)-C(18)  | 177.49(11)  |
| C(15)-C(14)-C(19)-N(3)  | -173.60(11) |
| C(6)-C(14)-C(19)-N(3)   | 2.45(13)    |
| C(21)-N(3)-C(19)-C(18)  | 17.6(2)     |
| C(20)-N(3)-C(19)-C(18)  | -162.45(13) |
| C(21)-N(3)-C(19)-C(14)  | -167.86(11) |
| C(20)-N(3)-C(19)-C(14)  | 12.11(13)   |
| C(21)-N(3)-C(20)-O(8)   | -21.0(2)    |
| C(19)-N(3)-C(20)-O(8)   | 158.98(12)  |
| C(21)-N(3)-C(20)-C(6)   | 159.14(11)  |
| C(19)-N(3)-C(20)-C(6)   | -20.83(12)  |
| N(2)-C(6)-C(20)-O(8)    | -33.95(17)  |
| C(14)-C(6)-C(20)-O(8)   | -158.91(12) |
| C(5)-C(6)-C(20)-O(8)    | 78.89(14)   |

|                         |             |
|-------------------------|-------------|
| N(2)-C(6)-C(20)-N(3)    | 145.86(10)  |
| C(14)-C(6)-C(20)-N(3)   | 20.89(11)   |
| C(5)-C(6)-C(20)-N(3)    | -101.30(10) |
| C(22)-O(10)-C(21)-O(9)  | 5.6(2)      |
| C(22)-O(10)-C(21)-N(3)  | -171.87(10) |
| C(20)-N(3)-C(21)-O(9)   | 174.12(12)  |
| C(19)-N(3)-C(21)-O(9)   | -5.91(19)   |
| C(20)-N(3)-C(21)-O(10)  | -8.25(17)   |
| C(19)-N(3)-C(21)-O(10)  | 171.72(10)  |
| C(21)-O(10)-C(22)-C(23) | 175.32(11)  |
| C(21)-O(10)-C(22)-C(24) | -66.63(14)  |
| C(21)-O(10)-C(22)-C(25) | 57.77(15)   |
| C(7)-N(2)-C(26)-C(27)   | -53.49(15)  |
| C(6)-N(2)-C(26)-C(27)   | 130.59(11)  |
| C(7)-N(2)-C(26)-C(29)   | -171.27(11) |
| C(6)-N(2)-C(26)-C(29)   | 12.80(13)   |
| C(28)-O(12)-C(27)-O(11) | 1.1(2)      |
| C(28)-O(12)-C(27)-C(26) | 176.69(12)  |
| N(2)-C(26)-C(27)-O(11)  | -42.01(16)  |
| C(29)-C(26)-C(27)-O(11) | 70.77(15)   |
| N(2)-C(26)-C(27)-O(12)  | 142.39(11)  |
| C(29)-C(26)-C(27)-O(12) | -104.83(12) |
| C(13)-C(5)-C(29)-C(30)  | 36.13(14)   |
| C(4)-C(5)-C(29)-C(30)   | -81.87(12)  |
| C(6)-C(5)-C(29)-C(30)   | 159.90(10)  |
| C(13)-C(5)-C(29)-C(26)  | -88.01(11)  |
| C(4)-C(5)-C(29)-C(26)   | 153.99(10)  |
| C(6)-C(5)-C(29)-C(26)   | 35.76(11)   |
| N(2)-C(26)-C(29)-C(30)  | -154.34(10) |
| C(27)-C(26)-C(29)-C(30) | 86.67(12)   |

|                         |             |
|-------------------------|-------------|
| N(2)-C(26)-C(29)-C(5)   | -30.24(11)  |
| C(27)-C(26)-C(29)-C(5)  | -149.23(10) |
| C(31)-O(3)-C(30)-O(4)   | -2.49(19)   |
| C(31)-O(3)-C(30)-C(29)  | 177.05(12)  |
| C(5)-C(29)-C(30)-O(4)   | -126.32(14) |
| C(26)-C(29)-C(30)-O(4)  | -6.58(18)   |
| C(5)-C(29)-C(30)-O(3)   | 54.14(13)   |
| C(26)-C(29)-C(30)-O(3)  | 173.88(10)  |
| C(39)-C(9)-C(32)-C(33)  | -1.4(2)     |
| C(8)-C(9)-C(32)-C(33)   | 172.78(13)  |
| C(38)-C(10)-C(33)-C(32) | 1.7(3)      |
| C(9)-C(32)-C(33)-C(10)  | -0.1(2)     |
| C(12)-C(13)-C(34)-C(35) | 0.01(18)    |
| C(5)-C(13)-C(34)-C(35)  | 176.57(12)  |
| C(13)-C(34)-C(35)-C(36) | -1.17(19)   |
| C(34)-C(35)-C(36)-C(37) | 1.1(2)      |
| C(13)-C(12)-C(37)-C(36) | -1.40(19)   |
| N(1)-C(12)-C(37)-C(36)  | 177.94(12)  |
| C(35)-C(36)-C(37)-C(12) | 0.2(2)      |

---

Symmetry transformations used to generate equivalent atoms:

Table 7. Hydrogen bonds for compound **3a** [Å and deg.].

---

| D-H...A | d(D-H) | d(H...A) | d(D...A) | <(DHA) |
|---------|--------|----------|----------|--------|
|---------|--------|----------|----------|--------|

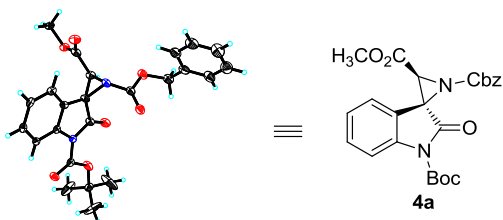

CCDC number: CCDC 980257

Table 1. Crystal data and structure refinement for compound **4a**.

|                                 |                                                                                                                                        |
|---------------------------------|----------------------------------------------------------------------------------------------------------------------------------------|
| Identification code             | compound <b>4a</b>                                                                                                                     |
| Empirical formula               | C <sub>24</sub> H <sub>24</sub> N <sub>2</sub> O <sub>7</sub>                                                                          |
| Formula weight                  | 452.45                                                                                                                                 |
| Temperature                     | 100(2) K                                                                                                                               |
| Wavelength                      | 0.71073 Å                                                                                                                              |
| Crystal system, space group     | Triclinic, P -1                                                                                                                        |
| Unit cell dimensions            | a = 6.647(8) Å    alpha = 87.147(15) deg.<br>b = 12.469(15) Å    beta = 79.429(16) deg.<br>c = 14.173(16) Å    gamma = 89.310(15) deg. |
| Volume                          | 1153(2) Å <sup>3</sup>                                                                                                                 |
| Z, Calculated density           | 2, 1.303 Mg/m <sup>3</sup>                                                                                                             |
| Absorption coefficient          | 0.097 mm <sup>-1</sup>                                                                                                                 |
| F(000)                          | 476                                                                                                                                    |
| Crystal size                    | 1.36 x 0.09 x 0.07 mm                                                                                                                  |
| Theta range for data collection | 1.46 to 27.99 deg.                                                                                                                     |
| Limiting indices                | -8 ≤ h ≤ 8, -16 ≤ k ≤ 16, -18 ≤ l ≤ 18                                                                                                 |
| Reflections collected / unique  | 13439 / 5478 [R(int) = 0.1587]                                                                                                         |
| Completeness to theta = 27.99   | 98.4 %                                                                                                                                 |
| Absorption correction           | Semi-empirical from equivalents                                                                                                        |
| Max. and min. transmission      | 0.9933 and 0.8797                                                                                                                      |
| Refinement method               | Full-matrix least-squares on F <sup>2</sup>                                                                                            |
| Data / restraints / parameters  | 5478 / 0 / 302                                                                                                                         |

|                                      |                                       |
|--------------------------------------|---------------------------------------|
| Goodness-of-fit on $F^2$             | 1.079                                 |
| Final R indices [ $I > 2\sigma(I)$ ] | R1 = 0.1679, wR2 = 0.4117             |
| R indices (all data)                 | R1 = 0.2708, wR2 = 0.4605             |
| Largest diff. peak and hole          | 0.669 and -0.499 e. $\text{\AA}^{-3}$ |

Table 2. Atomic coordinates ( $\times 10^4$ ) and equivalent isotropic displacement parameters ( $\text{\AA}^2 \times 10^3$ ) for compound **4a**.

$U(\text{eq})$  is defined as one third of the trace of the orthogonalized  $U_{ij}$  tensor.

| Atom  | x         | y        | z        | $U(\text{eq})$ |
|-------|-----------|----------|----------|----------------|
| O(1)  | 7631(11)  | -2577(4) | 8312(4)  | 51(2)          |
| O(2)  | 10111(11) | 1483(5)  | 5789(4)  | 49(2)          |
| O(3)  | 11866(10) | 460(5)   | 6748(4)  | 47(2)          |
| O(4)  | 6603(10)  | 3344(5)  | 7970(5)  | 45(2)          |
| O(5)  | 3802(9)   | 2492(4)  | 7669(4)  | 36(1)          |
| O(6)  | 7805(10)  | -786(5)  | 7215(4)  | 43(2)          |
| O(7)  | 7132(10)  | -2447(4) | 9932(4)  | 41(2)          |
| N(1)  | 7532(9)   | -921(5)  | 8909(4)  | 24(1)          |
| C(1)  | 5361(16)  | -4111(9) | 8818(13) | 98(6)          |
| C(2)  | 7462(13)  | -3766(7) | 8333(7)  | 39(2)          |
| C(3)  | 7409(10)  | -2056(6) | 9121(6)  | 26(2)          |
| C(4)  | 7728(11)  | -404(6)  | 7991(6)  | 29(2)          |
| C(5)  | 7799(12)  | 809(6)   | 8145(6)  | 30(2)          |
| N(2)  | 9055(10)  | 1491(5)  | 7397(5)  | 32(2)          |
| C(7)  | 10429(14) | 1050(7)  | 6635(6)  | 36(2)          |
| C(8)  | 11654(16) | 1208(7)  | 4951(7)  | 48(2)          |
| C(9)  | 13541(17) | 1917(7)  | 4845(7)  | 48(2)          |
| C(10) | 13585(18) | 2874(8)  | 5324(8)  | 56(3)          |
| C(11) | 15329(19) | 3500(8)  | 5190(8)  | 61(3)          |
| C(12) | 17050(20) | 3232(10) | 4562(9)  | 71(3)          |

|       |           |           |          |         |
|-------|-----------|-----------|----------|---------|
| C(13) | 6870(13)  | 1518(6)   | 7432(6)  | 34(2)   |
| C(14) | 5785(14)  | 2556(7)   | 7723(6)  | 37(2)   |
| C(15) | 2575(14)  | 3441(6)   | 7934(7)  | 41(2)   |
| C(16) | 9077(18)  | -4288(10) | 8763(12) | 90(5)   |
| C(17) | 7522(10)  | -131(6)   | 9632(5)  | 25(2)   |
| C(18) | 7725(10)  | 908(5)    | 9196(5)  | 24(2)   |
| C(19) | 7833(11)  | 1802(6)   | 9734(6)  | 29(2)   |
| C(20) | 7700(10)  | 1636(6)   | 10727(6) | 28(2)   |
| C(21) | 7475(11)  | 600(6)    | 11150(6) | 29(2)   |
| C(22) | 7398(10)  | -291(6)   | 10635(5) | 25(2)   |
| C(23) | 15307(18) | 1644(9)   | 4200(7)  | 56(3)   |
| C(24) | 17040(20) | 2287(10)  | 4041(9)  | 68(3)   |
| C(6)  | 7730(40)  | -3989(10) | 7267(9)  | 157(11) |

---

Table 3. Bond lengths [Å] and angles [deg] for compound **4a**.

|            |           |
|------------|-----------|
| O(1)-C(3)  | 1.330(10) |
| O(1)-C(2)  | 1.486(10) |
| O(2)-C(7)  | 1.342(10) |
| O(2)-C(8)  | 1.472(12) |
| O(3)-C(7)  | 1.227(10) |
| O(4)-C(14) | 1.224(10) |
| O(5)-C(14) | 1.338(10) |
| O(5)-C(15) | 1.454(10) |
| O(6)-C(4)  | 1.212(10) |
| O(7)-C(3)  | 1.209(9)  |
| N(1)-C(4)  | 1.407(10) |
| N(1)-C(3)  | 1.433(10) |
| N(1)-C(17) | 1.455(10) |



|              |           |
|--------------|-----------|
| C(1)-C(2)    | 1.497(13) |
| C(1)-H(1A)   | 0.9800    |
| C(1)-H(1B)   | 0.9800    |
| C(1)-H(1C)   | 0.9800    |
| C(2)-C(16)   | 1.460(14) |
| C(2)-C(6)    | 1.527(16) |
| C(4)-C(5)    | 1.542(11) |
| C(5)-N(2)    | 1.465(10) |
| C(5)-C(18)   | 1.492(11) |
| C(5)-C(13)   | 1.521(11) |
| N(2)-C(7)    | 1.410(11) |
| N(2)-C(13)   | 1.444(11) |
| C(8)-C(9)    | 1.524(14) |
| C(8)-H(8A)   | 0.9900    |
| C(8)-H(8B)   | 0.9900    |
| C(9)-C(23)   | 1.399(15) |
| C(9)-C(10)   | 1.405(14) |
| C(10)-C(11)  | 1.383(15) |
| C(10)-H(10)  | 0.9500    |
| C(11)-C(12)  | 1.364(17) |
| C(11)-H(11)  | 0.9500    |
| C(12)-C(24)  | 1.422(17) |
| C(12)-H(12)  | 0.9500    |
| C(13)-C(14)  | 1.512(12) |
| C(13)-H(13)  | 1.0000    |
| C(15)-H(15A) | 0.9800    |
| C(15)-H(15B) | 0.9800    |
| C(15)-H(15C) | 0.9800    |
| C(16)-H(16A) | 0.9800    |
| C(16)-H(16B) | 0.9800    |

|                  |           |
|------------------|-----------|
| C(16)-H(16C)     | 0.9800    |
| C(17)-C(18)      | 1.404(10) |
| C(17)-C(22)      | 1.413(11) |
| C(18)-C(19)      | 1.391(11) |
| C(19)-C(20)      | 1.400(11) |
| C(19)-H(19)      | 0.9500    |
| C(20)-C(21)      | 1.395(11) |
| C(20)-H(20)      | 0.9500    |
| C(21)-C(22)      | 1.365(11) |
| C(21)-H(21)      | 0.9500    |
| C(22)-H(22)      | 0.9500    |
| C(23)-C(24)      | 1.390(16) |
| C(23)-H(23)      | 0.9500    |
| C(24)-H(24)      | 0.9500    |
| C(6)-H(6A)       | 0.9800    |
| C(6)-H(6B)       | 0.9800    |
| C(6)-H(6C)       | 0.9800    |
| C(3)-O(1)-C(2)   | 121.0(7)  |
| C(7)-O(2)-C(8)   | 115.1(8)  |
| C(14)-O(5)-C(15) | 115.8(6)  |
| C(4)-N(1)-C(3)   | 126.1(6)  |
| C(4)-N(1)-C(17)  | 110.1(6)  |
| C(3)-N(1)-C(17)  | 123.8(6)  |
| C(2)-C(1)-H(1A)  | 109.5     |
| C(2)-C(1)-H(1B)  | 109.5     |
| H(1A)-C(1)-H(1B) | 109.5     |
| C(2)-C(1)-H(1C)  | 109.5     |
| H(1A)-C(1)-H(1C) | 109.5     |
| H(1B)-C(1)-H(1C) | 109.5     |
| C(16)-C(2)-O(1)  | 111.4(8)  |

|                  |           |
|------------------|-----------|
| C(16)-C(2)-C(1)  | 112.9(11) |
| O(1)-C(2)-C(1)   | 110.2(8)  |
| C(16)-C(2)-C(6)  | 110.8(13) |
| O(1)-C(2)-C(6)   | 102.4(8)  |
| C(1)-C(2)-C(6)   | 108.6(13) |
| O(7)-C(3)-O(1)   | 127.0(7)  |
| O(7)-C(3)-N(1)   | 122.8(7)  |
| O(1)-C(3)-N(1)   | 110.2(7)  |
| O(6)-C(4)-N(1)   | 129.6(7)  |
| O(6)-C(4)-C(5)   | 124.3(7)  |
| N(1)-C(4)-C(5)   | 106.1(6)  |
| N(2)-C(5)-C(18)  | 123.9(6)  |
| N(2)-C(5)-C(13)  | 57.8(5)   |
| C(18)-C(5)-C(13) | 130.3(7)  |
| N(2)-C(5)-C(4)   | 118.1(7)  |
| C(18)-C(5)-C(4)  | 106.0(6)  |
| C(13)-C(5)-C(4)  | 114.6(6)  |
| C(7)-N(2)-C(13)  | 122.6(7)  |
| C(7)-N(2)-C(5)   | 121.7(7)  |
| C(13)-N(2)-C(5)  | 63.0(5)   |
| O(3)-C(7)-O(2)   | 125.2(8)  |
| O(3)-C(7)-N(2)   | 123.8(8)  |
| O(2)-C(7)-N(2)   | 110.4(8)  |
| O(2)-C(8)-C(9)   | 111.3(7)  |
| O(2)-C(8)-H(8A)  | 109.4     |
| C(9)-C(8)-H(8A)  | 109.4     |
| O(2)-C(8)-H(8B)  | 109.4     |
| C(9)-C(8)-H(8B)  | 109.4     |
| H(8A)-C(8)-H(8B) | 108.0     |
| C(23)-C(9)-C(10) | 117.3(9)  |

|                     |           |
|---------------------|-----------|
| C(23)-C(9)-C(8)     | 119.0(9)  |
| C(10)-C(9)-C(8)     | 123.6(10) |
| C(11)-C(10)-C(9)    | 121.3(11) |
| C(11)-C(10)-H(10)   | 119.3     |
| C(9)-C(10)-H(10)    | 119.3     |
| C(12)-C(11)-C(10)   | 121.4(10) |
| C(12)-C(11)-H(11)   | 119.3     |
| C(10)-C(11)-H(11)   | 119.3     |
| C(11)-C(12)-C(24)   | 118.8(11) |
| C(11)-C(12)-H(12)   | 120.6     |
| C(24)-C(12)-H(12)   | 120.6     |
| N(2)-C(13)-C(14)    | 116.6(6)  |
| N(2)-C(13)-C(5)     | 59.2(5)   |
| C(14)-C(13)-C(5)    | 121.3(7)  |
| N(2)-C(13)-H(13)    | 115.9     |
| C(14)-C(13)-H(13)   | 115.9     |
| C(5)-C(13)-H(13)    | 115.9     |
| O(4)-C(14)-O(5)     | 124.8(8)  |
| O(4)-C(14)-C(13)    | 125.0(8)  |
| O(5)-C(14)-C(13)    | 110.2(6)  |
| O(5)-C(15)-H(15A)   | 109.5     |
| O(5)-C(15)-H(15B)   | 109.5     |
| H(15A)-C(15)-H(15B) | 109.5     |
| O(5)-C(15)-H(15C)   | 109.5     |
| H(15A)-C(15)-H(15C) | 109.5     |
| H(15B)-C(15)-H(15C) | 109.5     |
| C(2)-C(16)-H(16A)   | 109.5     |
| C(2)-C(16)-H(16B)   | 109.5     |
| H(16A)-C(16)-H(16B) | 109.5     |
| C(2)-C(16)-H(16C)   | 109.5     |

|                     |           |
|---------------------|-----------|
| H(16A)-C(16)-H(16C) | 109.5     |
| H(16B)-C(16)-H(16C) | 109.5     |
| C(18)-C(17)-C(22)   | 120.5(7)  |
| C(18)-C(17)-N(1)    | 110.2(6)  |
| C(22)-C(17)-N(1)    | 129.3(6)  |
| C(19)-C(18)-C(17)   | 121.2(7)  |
| C(19)-C(18)-C(5)    | 131.2(7)  |
| C(17)-C(18)-C(5)    | 107.6(6)  |
| C(18)-C(19)-C(20)   | 117.9(7)  |
| C(18)-C(19)-H(19)   | 121.0     |
| C(20)-C(19)-H(19)   | 121.0     |
| C(21)-C(20)-C(19)   | 120.2(7)  |
| C(21)-C(20)-H(20)   | 119.9     |
| C(19)-C(20)-H(20)   | 119.9     |
| C(22)-C(21)-C(20)   | 122.9(7)  |
| C(22)-C(21)-H(21)   | 118.5     |
| C(20)-C(21)-H(21)   | 118.5     |
| C(21)-C(22)-C(17)   | 117.3(7)  |
| C(21)-C(22)-H(22)   | 121.4     |
| C(17)-C(22)-H(22)   | 121.4     |
| C(24)-C(23)-C(9)    | 121.5(10) |
| C(24)-C(23)-H(23)   | 119.2     |
| C(9)-C(23)-H(23)    | 119.2     |
| C(23)-C(24)-C(12)   | 119.6(12) |
| C(23)-C(24)-H(24)   | 120.2     |
| C(12)-C(24)-H(24)   | 120.2     |
| C(2)-C(6)-H(6A)     | 109.5     |
| C(2)-C(6)-H(6B)     | 109.5     |
| H(6A)-C(6)-H(6B)    | 109.5     |
| C(2)-C(6)-H(6C)     | 109.5     |

|                  |       |
|------------------|-------|
| H(6A)-C(6)-H(6C) | 109.5 |
| H(6B)-C(6)-H(6C) | 109.5 |

Table 4. Anisotropic displacement parameters ( $\text{\AA}^2 \times 10^3$ ) for compound **4a**.

The anisotropic displacement factor exponent takes the form:  $-2 \pi^2 [ h^2 a^{*2} U_{11} + \dots + 2 h k a^* b^* U_{12} ]$

| Atom  | U <sub>11</sub> | U <sub>22</sub> | U <sub>33</sub> | U <sub>23</sub> | U <sub>13</sub> | U <sub>12</sub> |
|-------|-----------------|-----------------|-----------------|-----------------|-----------------|-----------------|
| O(1)  | 95(5)           | 18(3)           | 35(4)           | -7(2)           | 2(3)            | -17(3)          |
| O(2)  | 71(5)           | 46(4)           | 29(3)           | -2(3)           | -9(3)           | -5(3)           |
| O(3)  | 54(4)           | 41(4)           | 43(4)           | 3(3)            | 0(3)            | -8(3)           |
| O(4)  | 52(4)           | 33(3)           | 57(4)           | -5(3)           | -25(3)          | -6(3)           |
| O(5)  | 46(3)           | 26(3)           | 41(3)           | -8(2)           | -17(3)          | -5(2)           |
| O(6)  | 64(4)           | 30(3)           | 39(4)           | -5(3)           | -15(3)          | -12(3)          |
| O(7)  | 60(4)           | 28(3)           | 33(3)           | 0(3)            | -8(3)           | -7(3)           |
| N(1)  | 22(3)           | 18(3)           | 31(3)           | -3(3)           | -3(2)           | -9(2)           |
| C(1)  | 30(5)           | 50(7)           | 206(17)         | -49(9)          | 11(7)           | -13(5)          |
| C(2)  | 34(4)           | 28(4)           | 54(6)           | -7(4)           | 0(4)            | -3(3)           |
| C(3)  | 12(3)           | 28(4)           | 38(5)           | -5(3)           | -4(3)           | -8(3)           |
| C(4)  | 29(4)           | 24(4)           | 37(5)           | -4(3)           | -10(3)          | -16(3)          |
| C(5)  | 37(4)           | 24(4)           | 32(4)           | 2(3)            | -12(3)          | -9(3)           |
| N(2)  | 43(4)           | 29(3)           | 27(4)           | 0(3)            | -10(3)          | -11(3)          |
| C(7)  | 48(5)           | 31(4)           | 28(4)           | -2(4)           | -6(4)           | -9(4)           |
| C(8)  | 70(7)           | 33(5)           | 40(5)           | -9(4)           | -9(5)           | -11(4)          |
| C(9)  | 74(7)           | 34(5)           | 38(5)           | 3(4)            | -13(5)          | -8(5)           |
| C(10) | 69(7)           | 49(6)           | 46(6)           | 6(5)            | -6(5)           | -2(5)           |
| C(11) | 91(9)           | 42(6)           | 55(7)           | -9(5)           | -18(6)          | -17(6)          |
| C(12) | 86(9)           | 70(8)           | 60(8)           | -12(6)          | -16(7)          | -20(7)          |

|       |         |       |         |        |        |         |
|-------|---------|-------|---------|--------|--------|---------|
| C(13) | 47(5)   | 24(4) | 34(5)   | -8(3)  | -18(4) | -9(3)   |
| C(14) | 49(5)   | 33(5) | 34(5)   | 1(4)   | -17(4) | -18(4)  |
| C(15) | 51(5)   | 21(4) | 50(6)   | -11(4) | -4(4)  | -4(4)   |
| C(16) | 61(7)   | 59(7) | 177(15) | -70(9) | -75(9) | 37(6)   |
| C(17) | 9(3)    | 28(4) | 36(4)   | -2(3)  | -2(3)  | -5(3)   |
| C(18) | 20(3)   | 20(3) | 35(4)   | -2(3)  | -10(3) | -10(3)  |
| C(19) | 19(4)   | 24(4) | 45(5)   | -8(3)  | -10(3) | -8(3)   |
| C(20) | 17(3)   | 34(4) | 33(4)   | -15(3) | -6(3)  | -2(3)   |
| C(21) | 18(3)   | 39(5) | 31(4)   | -6(3)  | -4(3)  | -2(3)   |
| C(22) | 15(3)   | 24(4) | 33(4)   | 1(3)   | 0(3)   | -6(3)   |
| C(23) | 81(8)   | 53(6) | 35(5)   | -2(5)  | -10(5) | -13(6)  |
| C(24) | 77(8)   | 72(8) | 55(7)   | 0(6)   | -13(6) | 0(6)    |
| C(6)  | 380(30) | 38(7) | 38(7)   | -4(6)  | 0(12)  | -53(12) |

---

Table 5. Hydrogen coordinates (  $\times 10^4$ ) and isotropic displacement parameters ( $\text{\AA}^2 \times 10^3$ ) for compound **4a**.

| Atom   | x     | y     | z     | U(eq) |
|--------|-------|-------|-------|-------|
| H(1A)  | 5088  | -3869 | 9477  | 147   |
| H(1B)  | 5270  | -4896 | 8832  | 147   |
| H(1C)  | 4348  | -3794 | 8463  | 147   |
| H(8A)  | 11052 | 1296  | 4362  | 57    |
| H(8B)  | 12061 | 446   | 5023  | 57    |
| H(10)  | 12393 | 3096  | 5748  | 67    |
| H(11)  | 15326 | 4128  | 5542  | 74    |
| H(12)  | 18238 | 3670  | 4474  | 85    |
| H(13)  | 6368  | 1139  | 6915  | 40    |
| H(15A) | 2601  | 3586  | 8605  | 61    |
| H(15B) | 1160  | 3317  | 7859  | 61    |
| H(15C) | 3136  | 4057  | 7517  | 61    |
| H(16A) | 10388 | -3937 | 8505  | 136   |
| H(16B) | 9164  | -5047 | 8611  | 136   |
| H(16C) | 8763  | -4231 | 9462  | 136   |
| H(19)  | 7992  | 2503  | 9436  | 34    |
| H(20)  | 7764  | 2231  | 11114 | 33    |
| H(21)  | 7370  | 509   | 11827 | 35    |
| H(22)  | 7265  | -990  | 10939 | 30    |
| H(23)  | 15321 | 1004  | 3862  | 68    |
| H(24)  | 18212 | 2097  | 3588  | 82    |
| H(6A)  | 9052  | -3709 | 6930  | 236   |
| H(6B)  | 6625  | -3636 | 6994  | 236   |
| H(6C)  | 7679  | -4765 | 7194  | 236   |



Table 6. Torsion angles [deg] for compound **4a**.

---

|                       |           |
|-----------------------|-----------|
| C(3)-O(1)-C(2)-C(16)  | -63.8(12) |
| C(3)-O(1)-C(2)-C(1)   | 62.3(12)  |
| C(3)-O(1)-C(2)-C(6)   | 177.7(12) |
| C(2)-O(1)-C(3)-O(7)   | 2.8(12)   |
| C(2)-O(1)-C(3)-N(1)   | -176.9(7) |
| C(4)-N(1)-C(3)-O(7)   | -176.0(7) |
| C(17)-N(1)-C(3)-O(7)  | 5.7(10)   |
| C(4)-N(1)-C(3)-O(1)   | 3.8(10)   |
| C(17)-N(1)-C(3)-O(1)  | -174.6(6) |
| C(3)-N(1)-C(4)-O(6)   | 1.0(13)   |
| C(17)-N(1)-C(4)-O(6)  | 179.6(8)  |
| C(3)-N(1)-C(4)-C(5)   | -179.9(6) |
| C(17)-N(1)-C(4)-C(5)  | -1.4(8)   |
| O(6)-C(4)-C(5)-N(2)   | -34.2(11) |
| N(1)-C(4)-C(5)-N(2)   | 146.7(6)  |
| O(6)-C(4)-C(5)-C(18)  | -178.4(7) |
| N(1)-C(4)-C(5)-C(18)  | 2.5(8)    |
| O(6)-C(4)-C(5)-C(13)  | 31.0(11)  |
| N(1)-C(4)-C(5)-C(13)  | -148.1(7) |
| C(18)-C(5)-N(2)-C(7)  | 126.9(8)  |
| C(13)-C(5)-N(2)-C(7)  | -113.3(8) |
| C(4)-C(5)-N(2)-C(7)   | -10.5(10) |
| C(18)-C(5)-N(2)-C(13) | -119.8(9) |
| C(4)-C(5)-N(2)-C(13)  | 102.8(7)  |
| C(8)-O(2)-C(7)-O(3)   | -0.2(12)  |
| C(8)-O(2)-C(7)-N(2)   | 171.1(6)  |
| C(13)-N(2)-C(7)-O(3)  | -136.2(8) |
| C(5)-N(2)-C(7)-O(3)   | -60.0(11) |

|                         |            |
|-------------------------|------------|
| C(13)-N(2)-C(7)-O(2)    | 52.3(9)    |
| C(5)-N(2)-C(7)-O(2)     | 128.5(7)   |
| C(7)-O(2)-C(8)-C(9)     | -81.8(9)   |
| O(2)-C(8)-C(9)-C(23)    | 168.4(9)   |
| O(2)-C(8)-C(9)-C(10)    | -15.2(13)  |
| C(23)-C(9)-C(10)-C(11)  | -2.4(15)   |
| C(8)-C(9)-C(10)-C(11)   | -178.9(10) |
| C(9)-C(10)-C(11)-C(12)  | 2.4(17)    |
| C(10)-C(11)-C(12)-C(24) | -0.3(18)   |
| C(7)-N(2)-C(13)-C(14)   | -135.8(8)  |
| C(5)-N(2)-C(13)-C(14)   | 112.3(8)   |
| C(7)-N(2)-C(13)-C(5)    | 112.0(8)   |
| C(18)-C(5)-C(13)-N(2)   | 109.3(8)   |
| C(4)-C(5)-C(13)-N(2)    | -108.9(7)  |
| N(2)-C(5)-C(13)-C(14)   | -104.2(8)  |
| C(18)-C(5)-C(13)-C(14)  | 5.1(12)    |
| C(4)-C(5)-C(13)-C(14)   | 146.9(7)   |
| C(15)-O(5)-C(14)-O(4)   | -0.4(12)   |
| C(15)-O(5)-C(14)-C(13)  | 179.8(7)   |
| N(2)-C(13)-C(14)-O(4)   | -3.5(12)   |
| C(5)-C(13)-C(14)-O(4)   | 65.0(11)   |
| N(2)-C(13)-C(14)-O(5)   | 176.3(7)   |
| C(5)-C(13)-C(14)-O(5)   | -115.2(8)  |
| C(4)-N(1)-C(17)-C(18)   | -0.4(8)    |
| C(3)-N(1)-C(17)-C(18)   | 178.2(6)   |
| C(4)-N(1)-C(17)-C(22)   | -178.6(7)  |
| C(3)-N(1)-C(17)-C(22)   | 0.0(10)    |
| C(22)-C(17)-C(18)-C(19) | 0.8(10)    |
| N(1)-C(17)-C(18)-C(19)  | -177.6(6)  |
| C(22)-C(17)-C(18)-C(5)  | -179.6(6)  |

|                         |           |
|-------------------------|-----------|
| N(1)-C(17)-C(18)-C(5)   | 2.0(8)    |
| N(2)-C(5)-C(18)-C(19)   | 35.3(12)  |
| C(13)-C(5)-C(18)-C(19)  | -39.0(13) |
| C(4)-C(5)-C(18)-C(19)   | 176.8(7)  |
| N(2)-C(5)-C(18)-C(17)   | -144.3(7) |
| C(13)-C(5)-C(18)-C(17)  | 141.5(8)  |
| C(4)-C(5)-C(18)-C(17)   | -2.8(8)   |
| C(17)-C(18)-C(19)-C(20) | -1.0(10)  |
| C(5)-C(18)-C(19)-C(20)  | 179.5(7)  |
| C(18)-C(19)-C(20)-C(21) | 0.2(10)   |
| C(19)-C(20)-C(21)-C(22) | 0.8(11)   |
| C(20)-C(21)-C(22)-C(17) | -1.0(10)  |
| C(18)-C(17)-C(22)-C(21) | 0.2(10)   |
| N(1)-C(17)-C(22)-C(21)  | 178.3(6)  |
| C(10)-C(9)-C(23)-C(24)  | 0.4(15)   |
| C(8)-C(9)-C(23)-C(24)   | 177.0(9)  |
| C(9)-C(23)-C(24)-C(12)  | 1.6(17)   |
| C(11)-C(12)-C(24)-C(23) | -1.7(18)  |

---

Symmetry transformations used to generate equivalent atoms:

Table 7. Hydrogen bonds for wlx\_wql\_1 [Å and deg.].

---

| D-H...A | d(D-H) | d(H...A) | d(D...A) | <(DHA) |
|---------|--------|----------|----------|--------|
|---------|--------|----------|----------|--------|

## 9. Selected <sup>1</sup>H NMR and <sup>13</sup>C NMR spectra

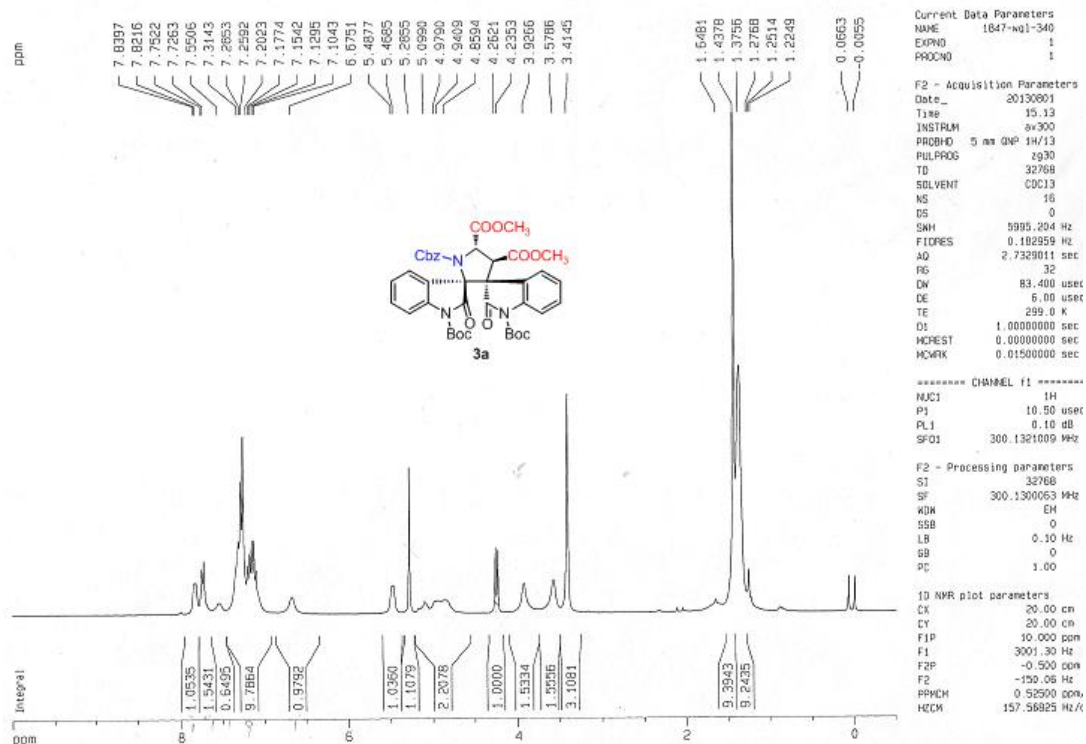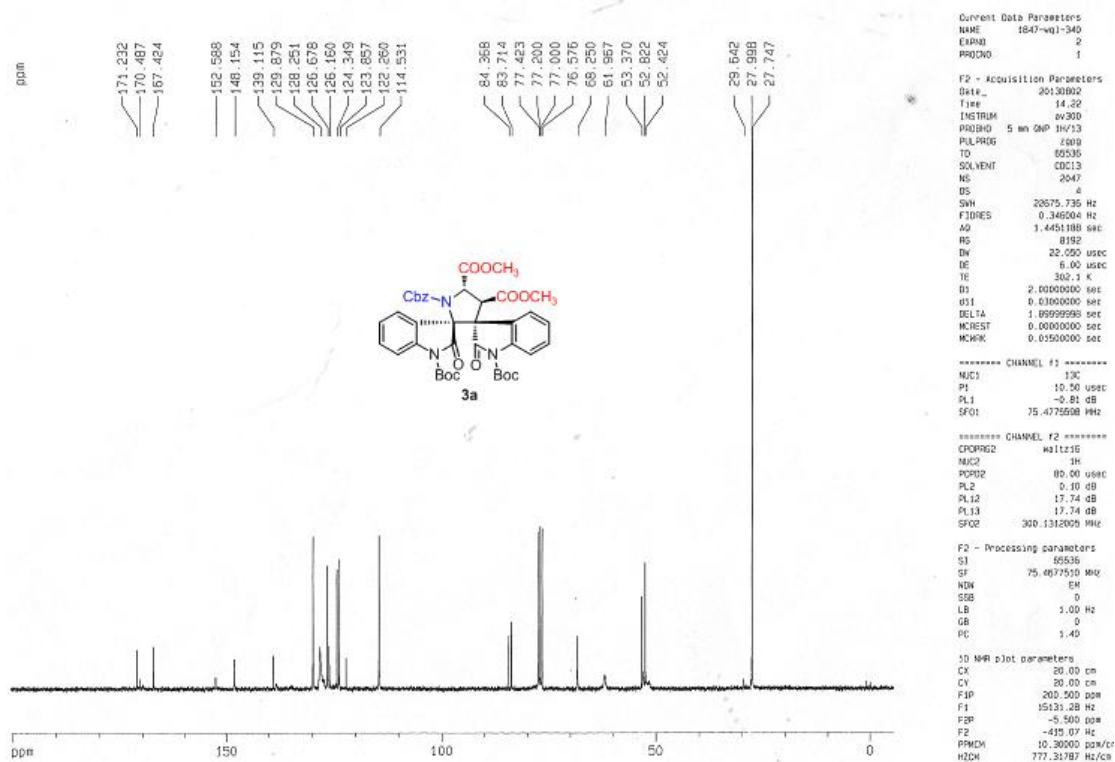

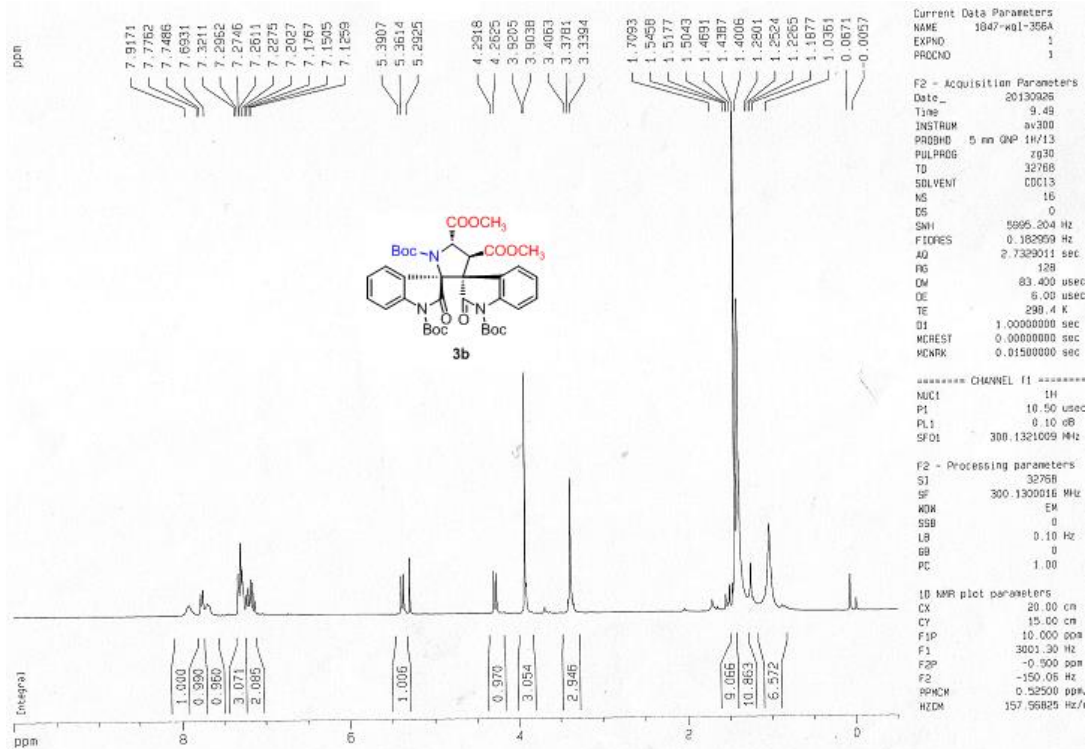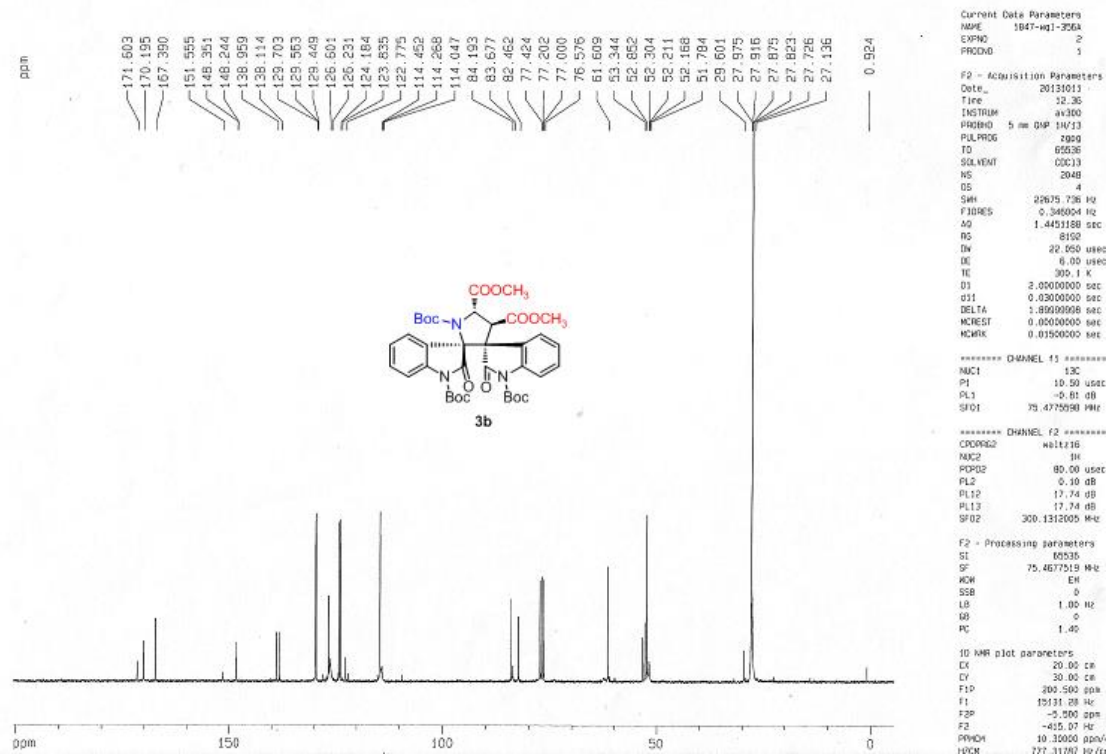

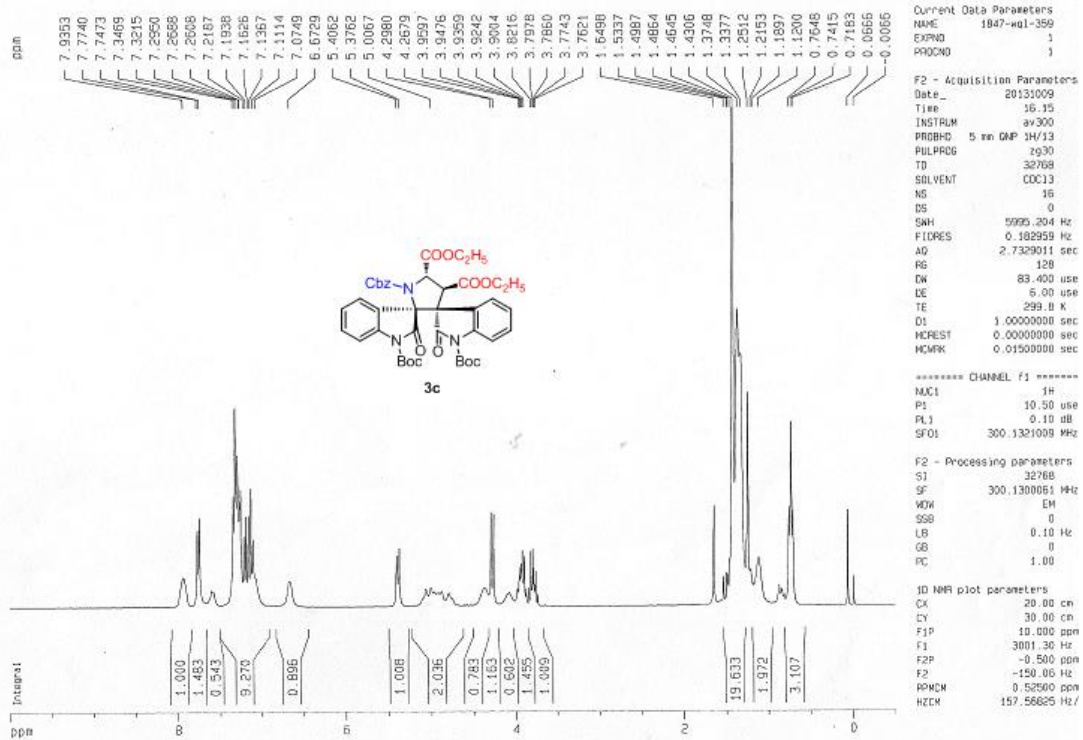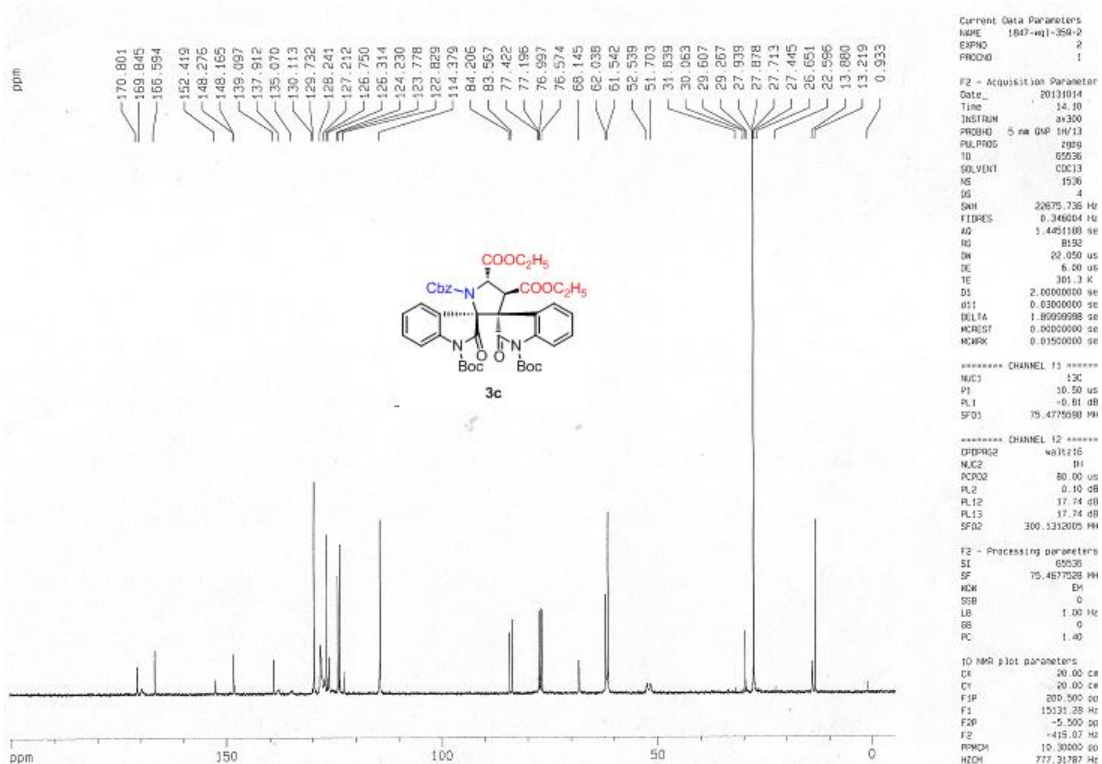

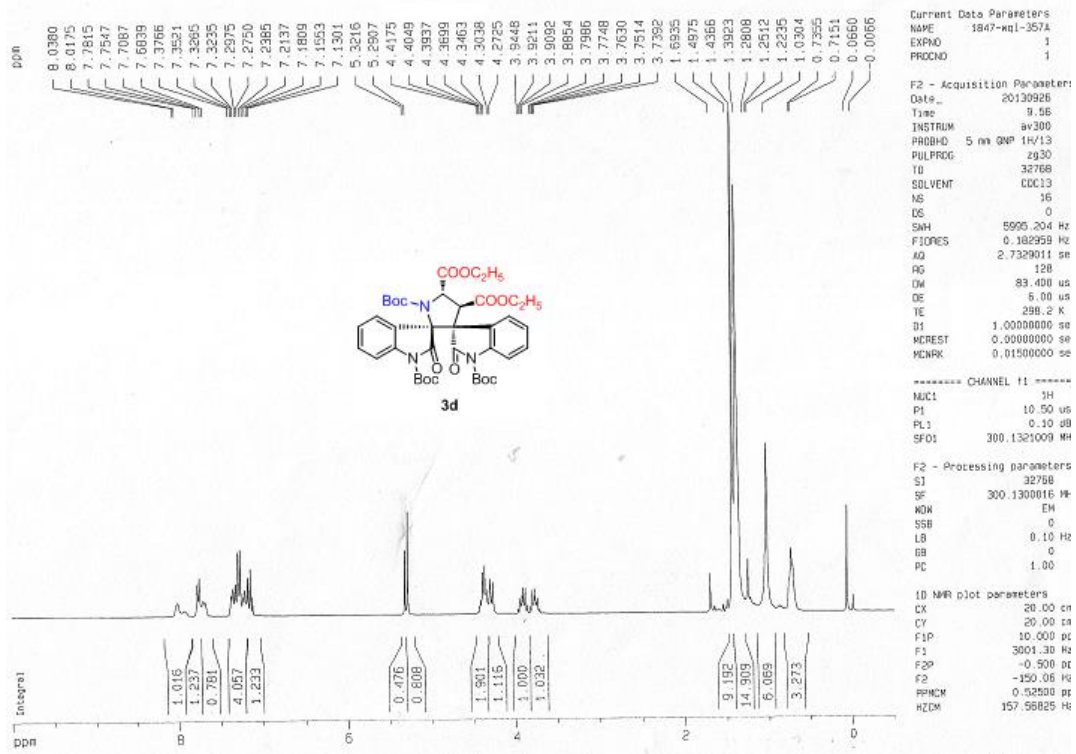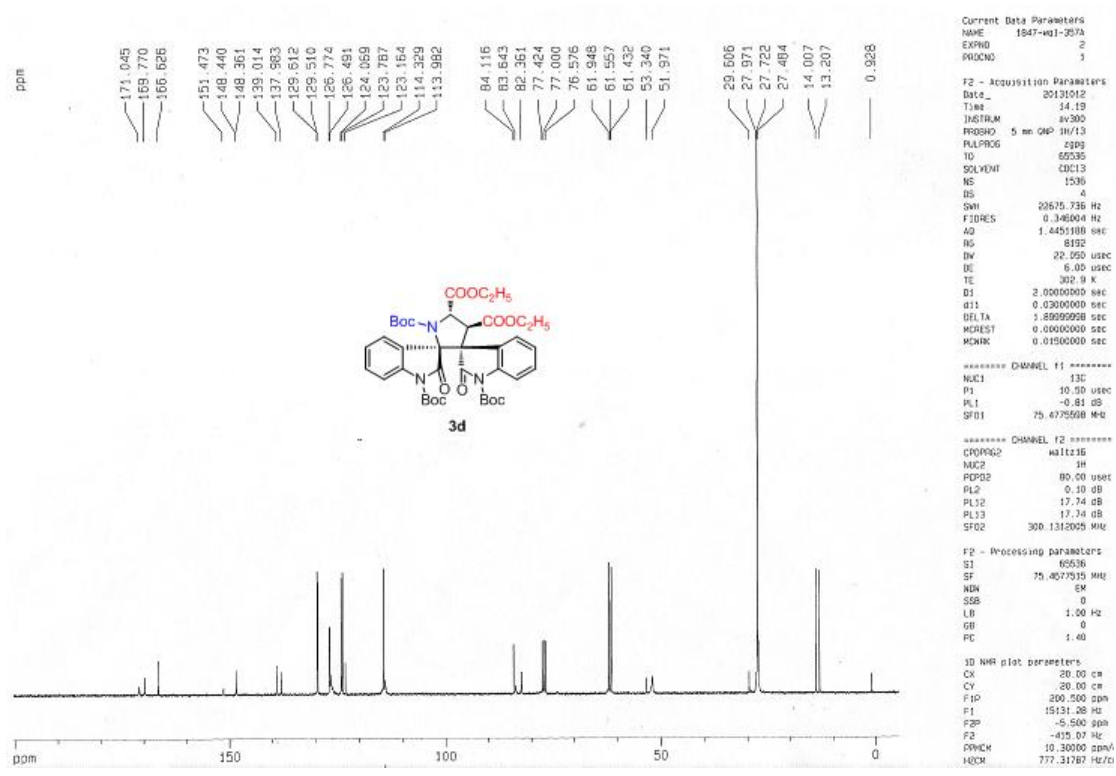

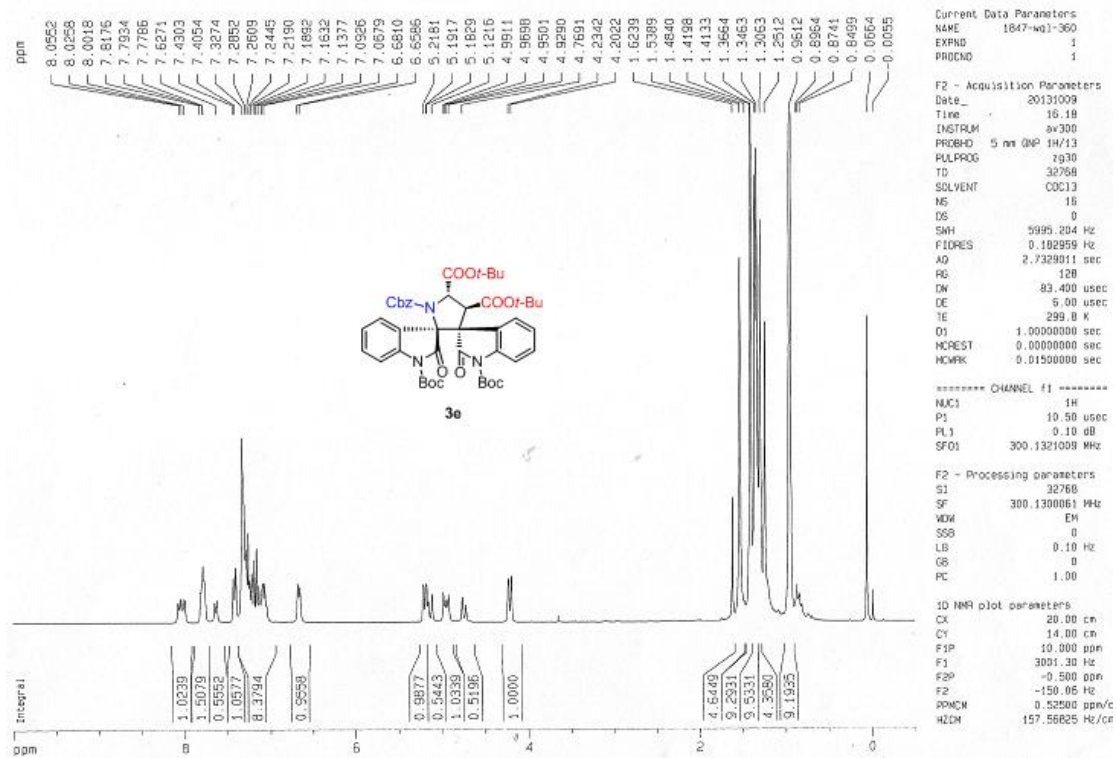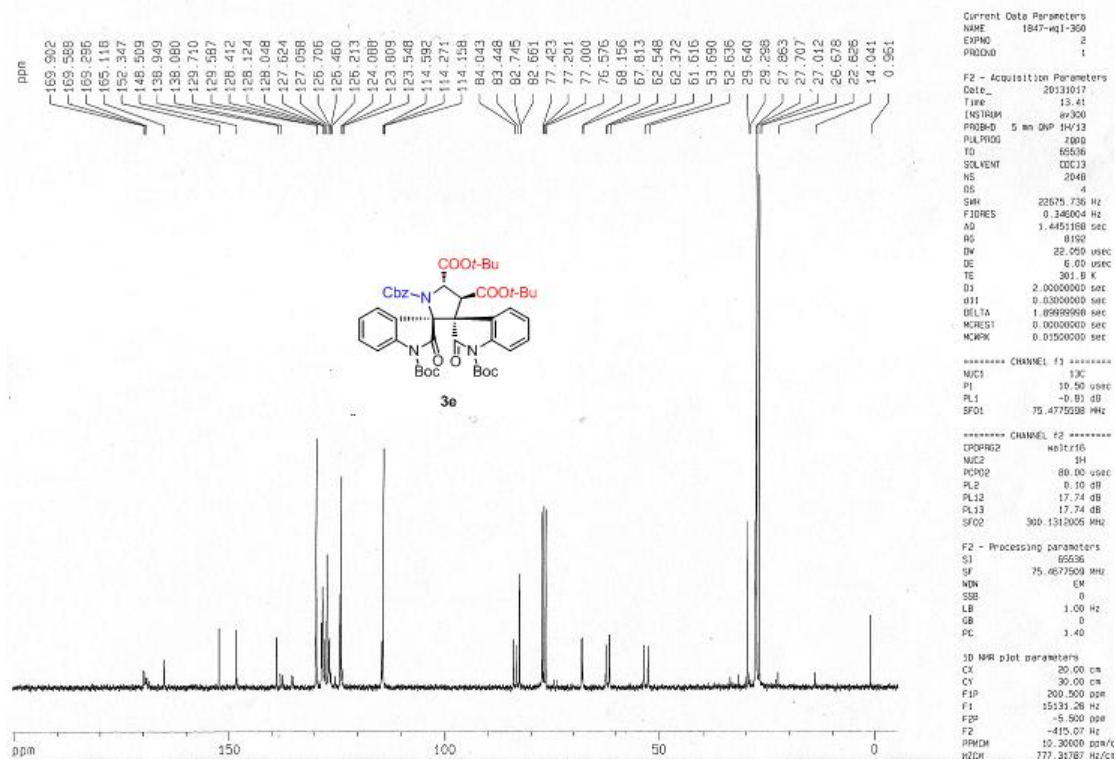



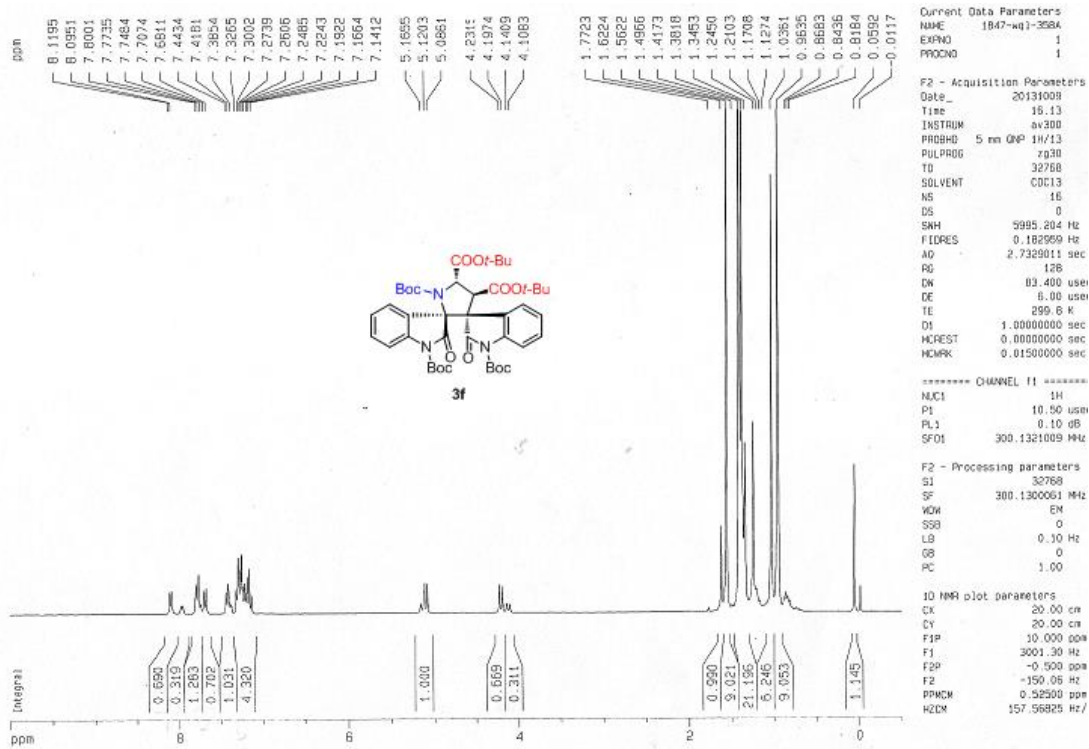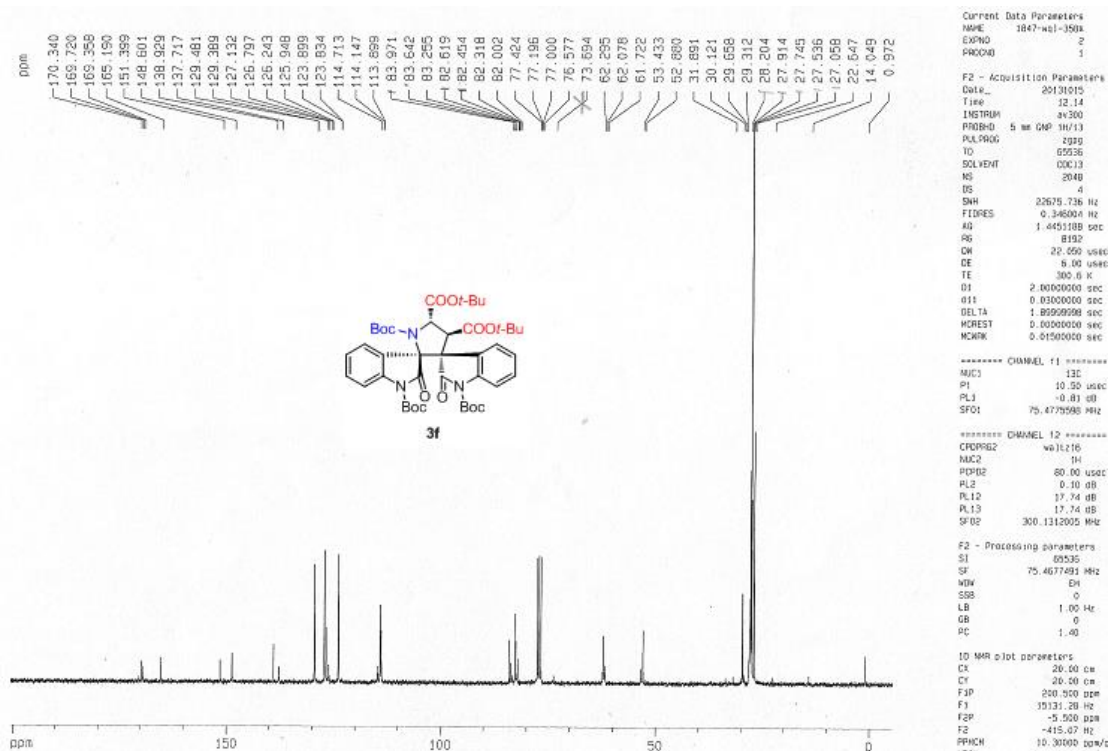

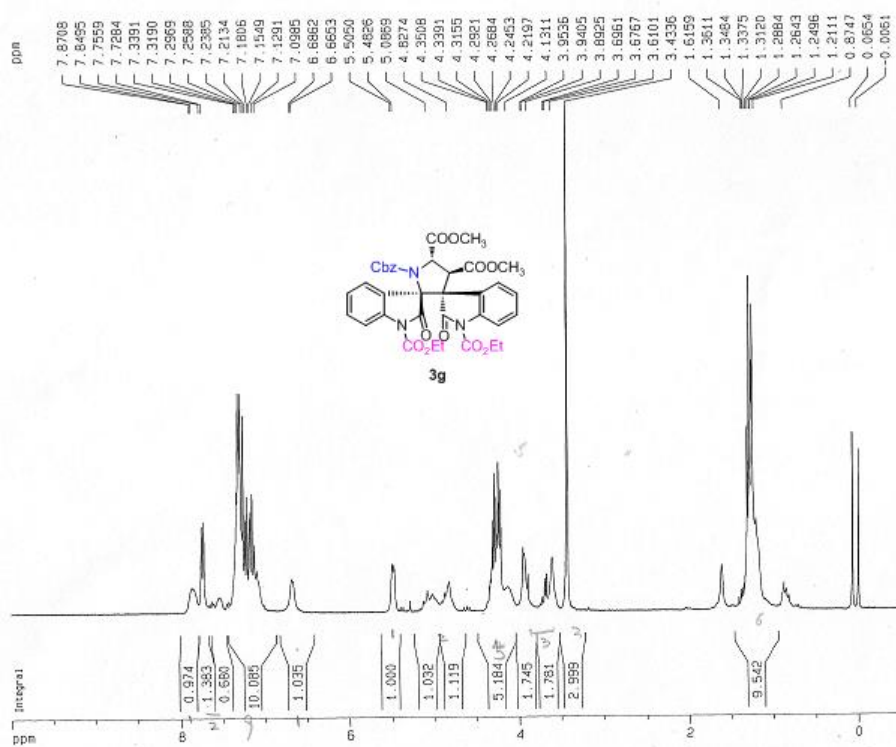

Current Data Parameters  
 NAME 1847-wj1-372  
 EXPNO 1  
 PROCNO 1

F2 - Acquisition Parameters  
 Date\_ 20131126  
 Time 14.59  
 INSTRUM av300  
 PROBHD 5 mm QNP 1H/13  
 PULPROG zg30  
 TD 32768  
 SOLVENT CDCl3  
 NS 16  
 DS 0  
 SWH 5995.204 Hz  
 FIDRES 0.182099 Hz  
 AQ 2.7329011 sec  
 RG 32  
 DM 83.400 usec  
 DE 6.00 usec  
 TE 293.2 K  
 D1 1.00000000 sec  
 MREST 0.00000000 sec  
 MCARR 0.01500000 sec

\*\*\*\*\* CHANNEL f1 \*\*\*\*\*  
 NUC1 1H  
 P1 10.50 usec  
 PL1 0.10 dB  
 SFO1 300.1321009 MHz

F2 - Processing parameters  
 SI 32768  
 SF 300.1300061 MHz  
 WMW EM  
 SSB 0  
 LB 0.10 Hz  
 GB 0  
 PC 1.00

1D NMR plot parameters  
 CX 20.00 cm  
 CY 12.00 cm  
 F1P 10.000 ppm  
 F1 3001.30 Hz  
 F2P -0.500 ppm  
 F2 -150.06 Hz  
 PPHCH 0.82500 ppm/r  
 HZCH 157.55620 Hz/c

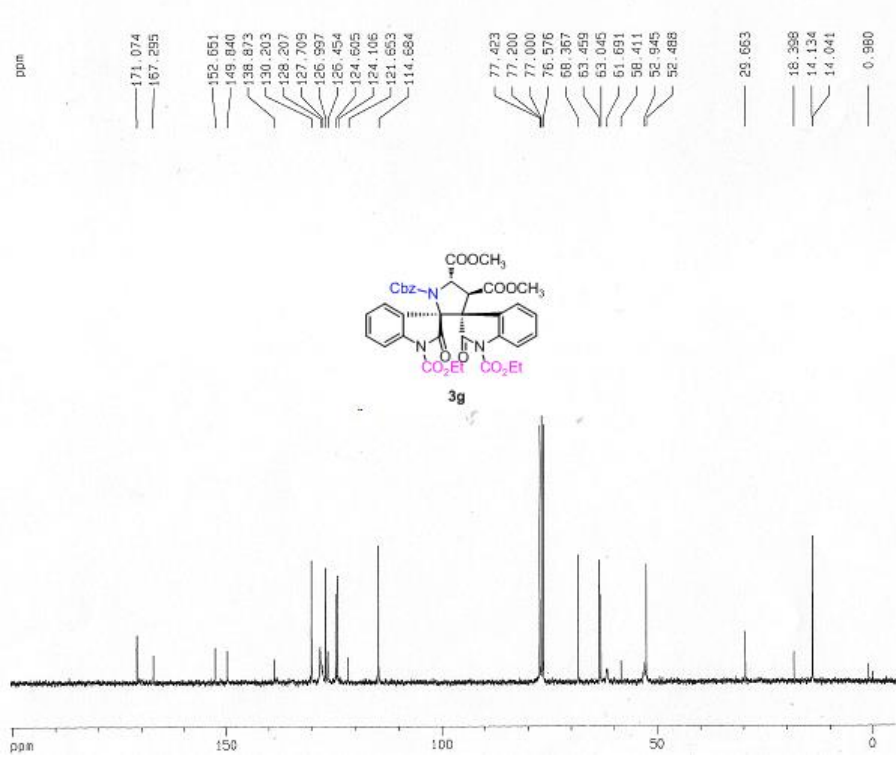

Current Data Parameters  
 NAME 1847-wj1-372  
 EXPNO 2  
 PROCNO 1

F2 - Acquisition Parameters  
 Date\_ 20131126  
 Time 14.59  
 INSTRUM av300  
 PROBHD 5 mm QNP 1H/13  
 PULPROG zgpg30  
 TD 65536  
 SOLVENT CDCl3  
 NS 2048  
 DS 4  
 SWH 22675.736 Hz  
 FIDRES 0.346004 Hz  
 AQ 1.4491185 sec  
 RG 8152  
 DM 22.050 usec  
 DE 6.00 usec  
 TE 297.2 K  
 D1 2.00000000 sec  
 d11 0.03000000 sec  
 DELTA 1.89999998 sec  
 MREST 0.00000000 sec  
 MCARR 0.01500000 sec

\*\*\*\*\* CHANNEL f1 \*\*\*\*\*  
 NUC1 13C  
 P1 10.50 usec  
 PL1 -0.81 dB  
 SFO1 75.4775668 MHz

\*\*\*\*\* CHANNEL f2 \*\*\*\*\*  
 NUC2 1H  
 PCPO2 80.00 usec  
 PL2 0.10 dB  
 PL12 17.74 dB  
 PL13 17.74 dB  
 SFO2 300.1321009 MHz

F2 - Processing parameters  
 SI 65536  
 SF 75.4677567 MHz  
 WMW EM  
 SSB 0  
 LB 1.00 Hz  
 GB 0  
 PC 1.40

1D NMR plot parameters  
 CX 20.00 cm  
 CY 6.00 cm  
 F1P 200.500 ppm  
 F1 35131.28 Hz  
 F2P -0.500 ppm  
 F2 -415.07 Hz  
 PPHCH 10.30000 ppm/r  
 HZCH 777.31767 Hz/c

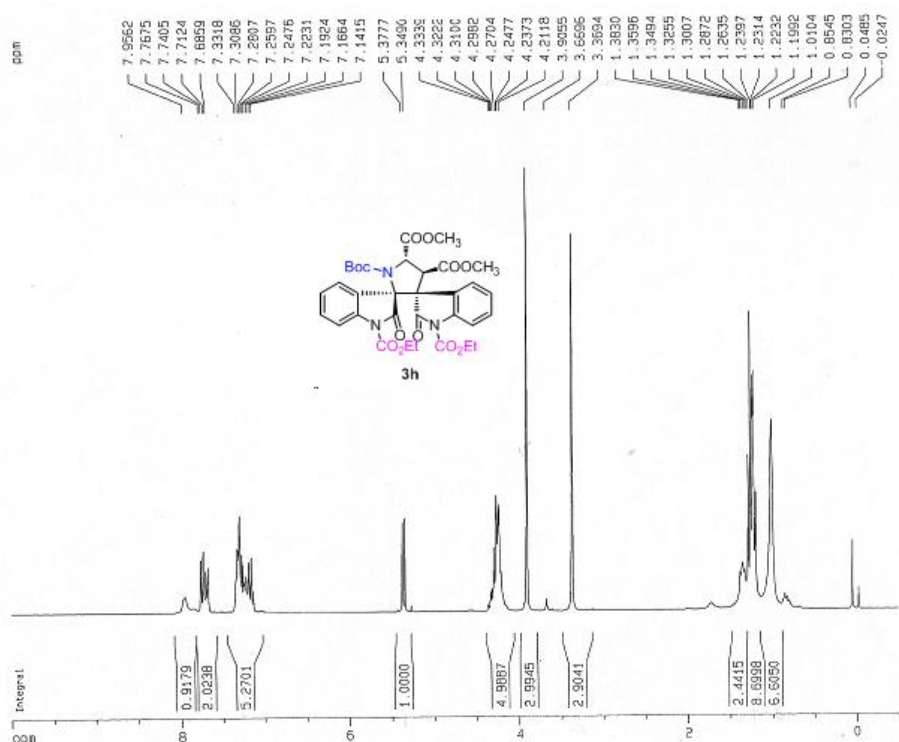

Current Data Parameters  
 NAME 1847-wq1-373  
 EXPNO 1  
 PROCNO 1

F2 - Acquisition Parameters  
 Date\_ 20131126  
 Time 15.02  
 INSTRUM av300  
 PROBRD 5 mm QNP 1H/13  
 PULPROG zg30  
 TD 32768  
 SOLVENT CDCl3  
 NS 16  
 DS 0  
 SWH 5995.204 Hz  
 FIDRES 0.182999 Hz  
 AQ 2.7329011 sec  
 RG 32  
 OW 83.400 us  
 DE 5.00 us  
 TE 293.2 K  
 D1 1.00000000 sec  
 MCREST 0.00000000 sec  
 MCKPK 0.01500000 sec

\*\*\*\*\* CHANNEL f1 \*\*\*\*\*  
 NUC1 1H  
 P1 10.50 us  
 PL1 0.10 dB  
 SFO1 300.1321009 MHz

F2 - Processing parameters  
 SI 32768  
 SF 300.1300051 MHz  
 WDW EM  
 SSB 0  
 LB 0.10 Hz  
 GB 0  
 PC 1.00

ID NMR plot parameters  
 CX 20.00 cm  
 CY 10.00 cm  
 F1P 10.000 pt  
 F1 3001.30 Hz  
 F2P -0.500 Hz  
 F2 -150.00 Hz  
 PRGM 0.52500 Hz  
 HZCM 157.56825 Hz

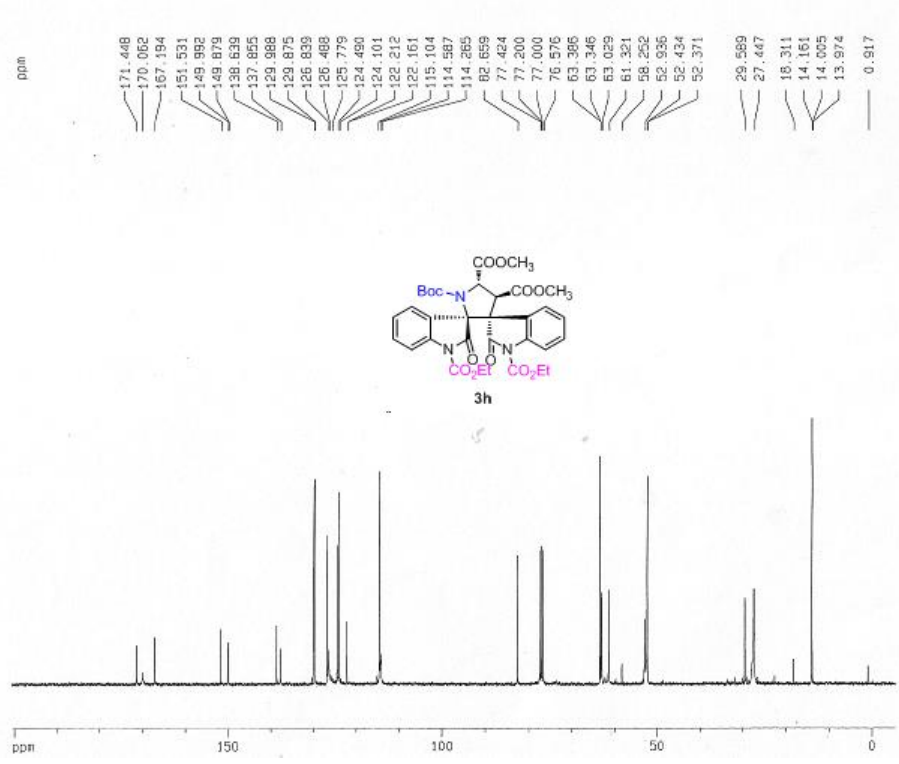

Current Data Parameters  
 NAME 1847-wq2-373  
 EXPNO 2  
 PROCNO 1

F2 - Acquisition Parameters  
 Date\_ 20131126  
 Time 12.30  
 INSTRUM av300  
 PROBRD 5 mm QNP 1H/13  
 PULPROG zgpg30  
 TD 65536  
 SOLVENT CDCl3  
 NS 4  
 DS 4  
 SWH 25675.136 Hz  
 FIDRES 0.346004 Hz  
 AQ 1.4451188 sec  
 RG 8192  
 OW 29.050 us  
 DE 5.00 us  
 TE 293.2 K  
 D1 2.00000000 sec  
 D11 0.20000000 sec  
 DELTA 1.80000000 sec  
 MCREST 0.00000000 sec  
 MCKPK 0.01500000 sec

\*\*\*\*\* CHANNEL f1 \*\*\*\*\*  
 NUC1 13C  
 P1 10.50 use  
 PL1 -0.01 dB  
 SFO1 75.4773588 MHz

\*\*\*\*\* CHANNEL f2 \*\*\*\*\*  
 CPDPRG2 waltz16  
 NUC2 1H  
 P2 80.00 use  
 PL2 0.10 dB  
 PL12 17.74 dB  
 PL13 17.74 dB  
 SFO2 300.1321009 MHz

F2 - Processing parameters  
 SI 65536  
 SF 75.4677542 MHz  
 NDN 0  
 SSB 0  
 LB 1.00 Hz  
 GB 0  
 PC 1.40

ID NMR plot parameters  
 CX 20.00 cm  
 CY 5.00 cm  
 F1P 200.500 ppm  
 F1 10131.28 Hz  
 F2P -5.500 ppm  
 F2 -415.07 Hz  
 PRGM 10.30400 ppm  
 HZCM 777.31787 Hz

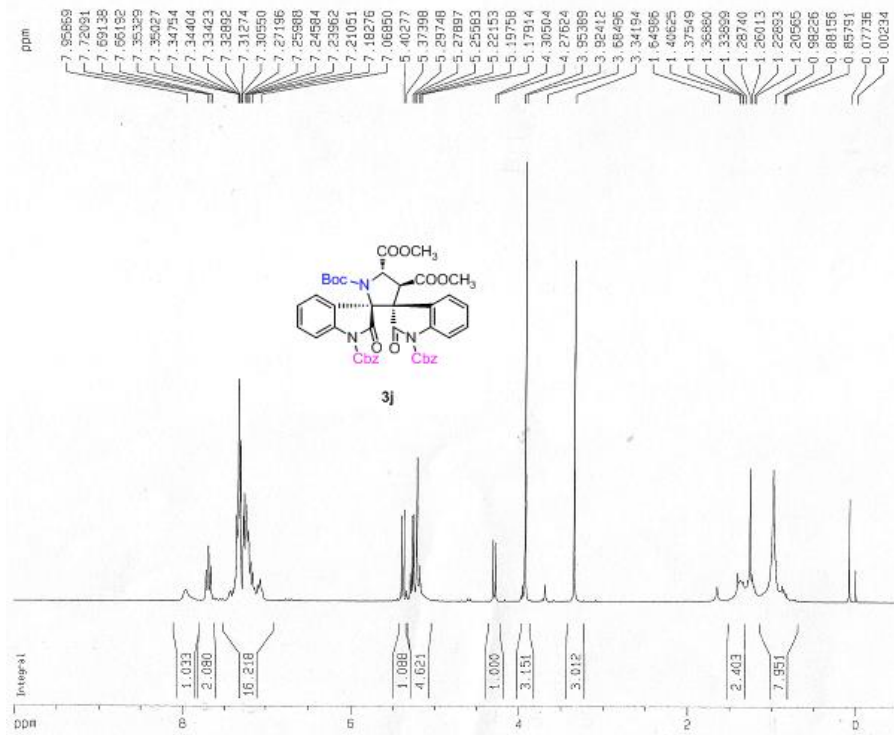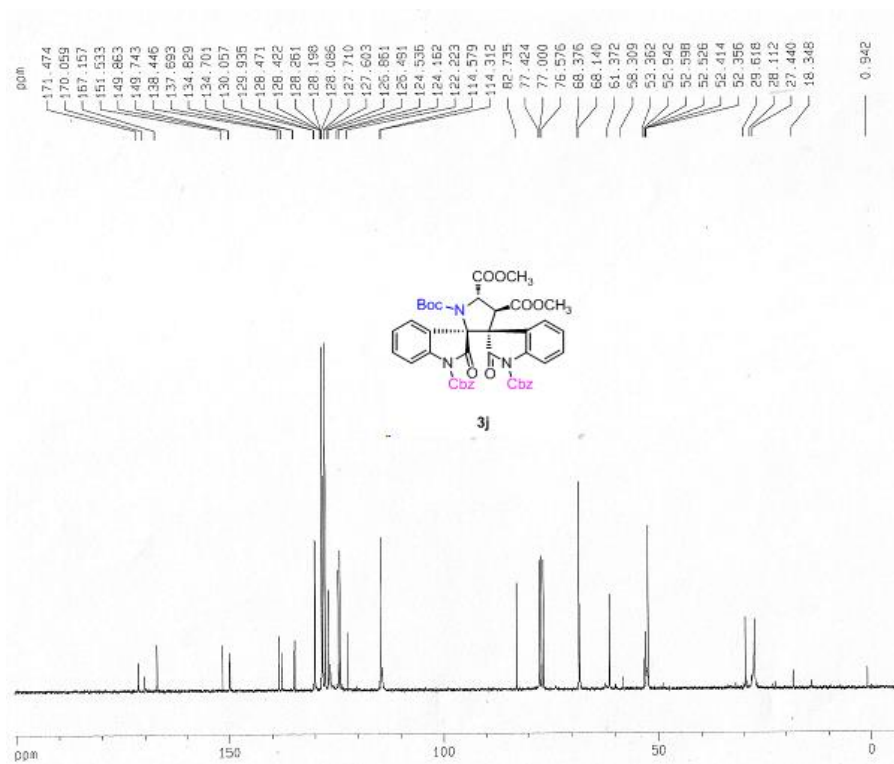

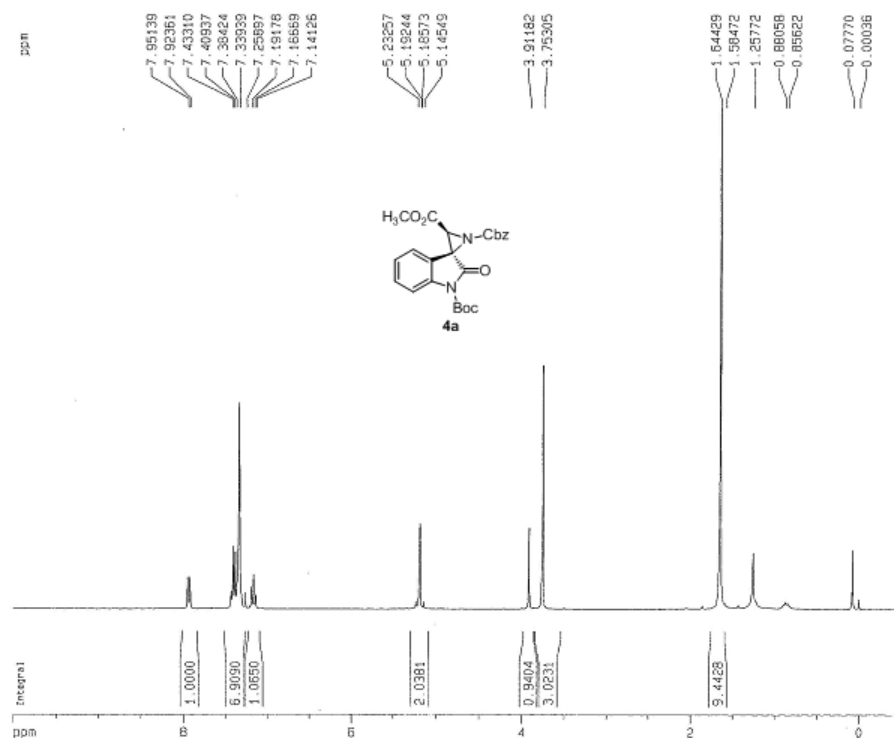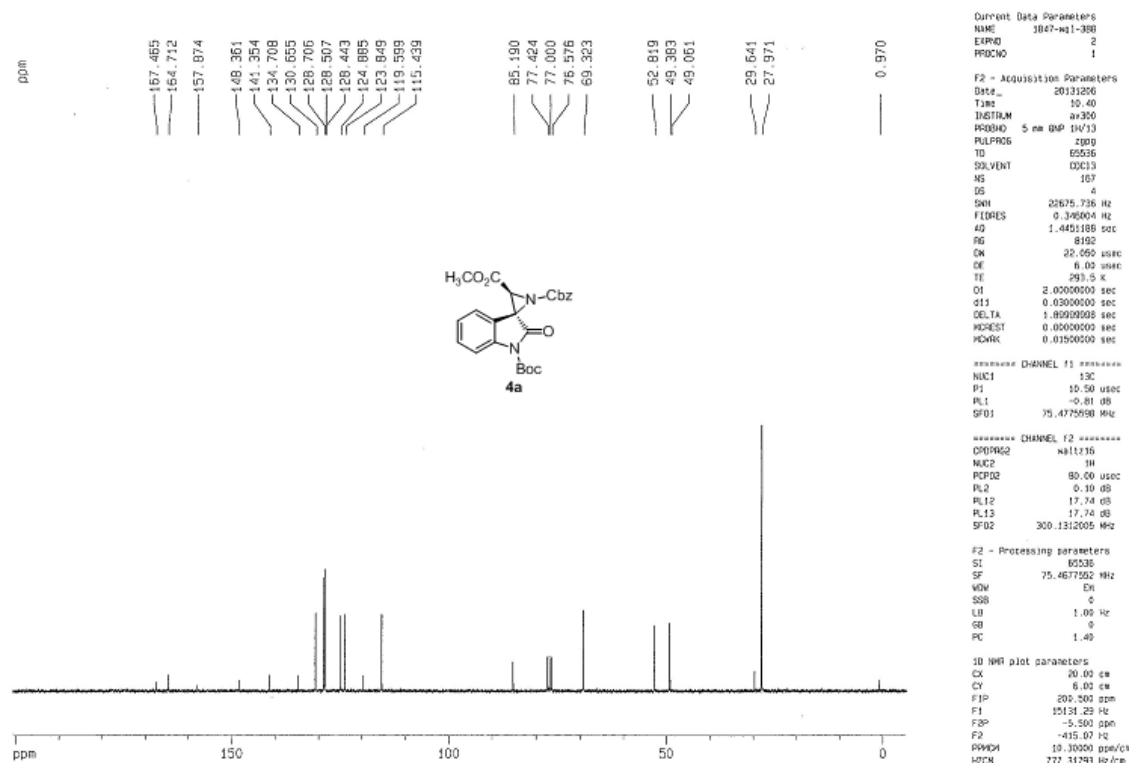

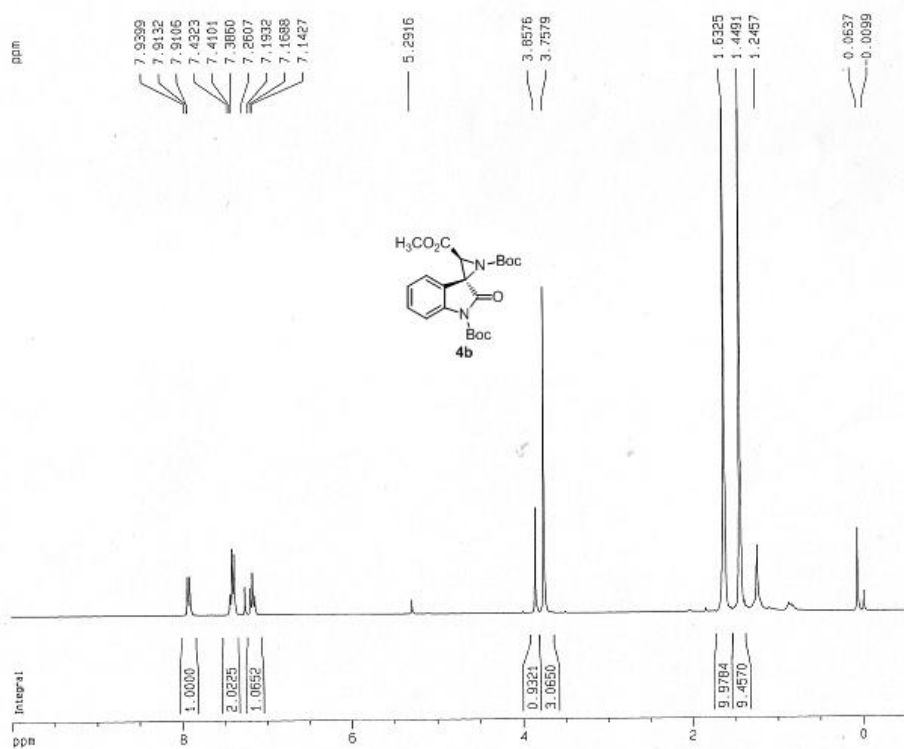

Current Data Parameters  
 NAME 1847-w1-375  
 EXPNO 1  
 PROCNO 1

F2 - Acquisition Parameters  
 Date\_ 2013126  
 Time 15.22  
 INSTRUM av300  
 PROBHD 5 mm QNP 1H/13  
 PULPROG zg30  
 TD 32768  
 SOLVENT CDCl3  
 NS 16  
 DS 0  
 SWH 5995.204 Hz  
 FIDRES 0.182959 Hz  
 AQ 2.7329011 sec  
 RG 128  
 DW 83.400 usec  
 DE 6.00 usec  
 TE 293.2 K  
 D1 1.00000000 sec  
 MCREST 0.00000000 sec  
 MEXPR 0.01500000 sec

\*\*\*\*\* CHANNEL f1 \*\*\*\*\*  
 NUC1 1H  
 P1 10.50 usec  
 PL1 0.10 dB  
 SFO1 300.1321009 MHz

F2 - Processing parameters  
 S1 32768  
 SF 300.1300061 MHz  
 NUK EM  
 SSB 0  
 LB 0.10 Hz  
 GB 0  
 PC 1.00

1D NMR plot parameters  
 CX 20.00 cm  
 CY 20.00 cm  
 F1P 10.000 ppm  
 F1 3001.30 Hz  
 F2P -0.500 ppm  
 F2 -150.05 Hz  
 PRMCH 0.52500 ppm/Hz  
 HZCM 157.59829 Hz/cm

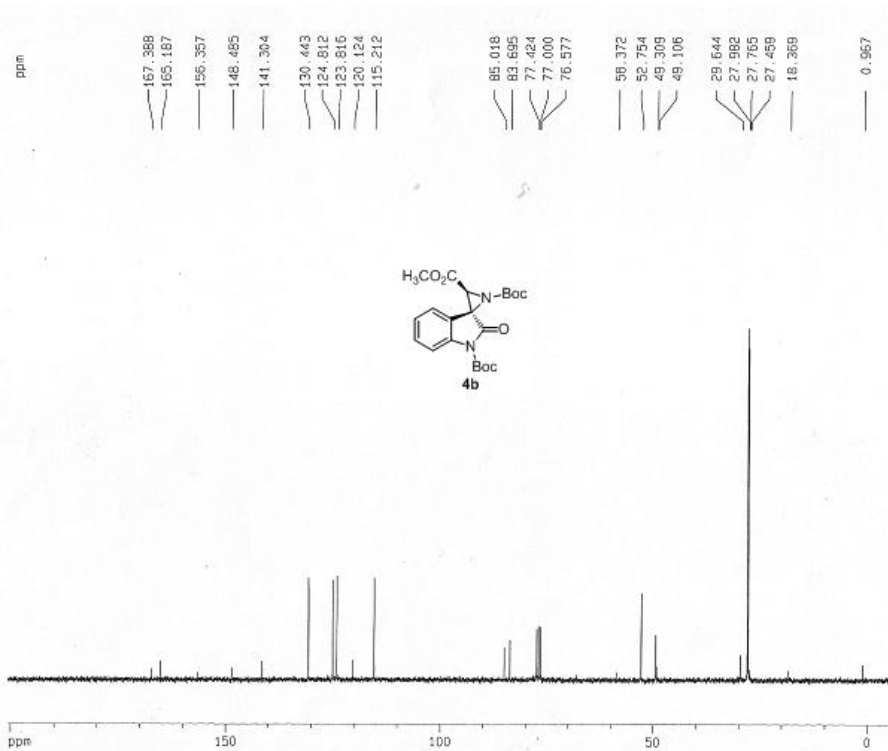

Current Data Parameters  
 NAME 1847-w1-375  
 EXPNO 2  
 PROCNO 1

F2 - Acquisition Parameters  
 Date\_ 20131211  
 Time 9.24  
 INSTRUM av300  
 PROBHD 5 mm QNP 1H/13  
 PULPROG zgpg  
 TD 65536  
 SOLVENT CDCl3  
 NS 207  
 DS 4  
 SWH 28675.736 Hz  
 FIDRES 0.340004 Hz  
 AQ 1.445188 sec  
 RG 8192  
 DW 22.050 usec  
 DE 6.00 usec  
 TE 293.4 K  
 D1 2.00000000 sec  
 d11 0.03000000 sec  
 DELTA 1.00000000 sec  
 MCREST 0.00000000 sec  
 MEXPR 0.01500000 sec

\*\*\*\*\* CHANNEL f1 \*\*\*\*\*  
 NUC1 13C  
 P1 10.50 usec  
 PL1 -0.81 dB  
 SFO1 75.4775298 MHz

\*\*\*\*\* CHANNEL f2 \*\*\*\*\*  
 CPDPRG2 waltz16  
 NUC2 1H  
 P2P20 85.00 usec  
 PL2 0.10 dB  
 PL12 17.74 dB  
 PL13 17.74 dB  
 SFO2 300.1312005 MHz

F2 - Processing parameters  
 S1 65536  
 SF 75.467536 MHz  
 NUK EM  
 SSB 0  
 LB 1.00 Hz  
 GB 0  
 PC 1.40

1D NMR plot parameters  
 CX 20.00 cm  
 CY 0.00 cm  
 F1P 200.500 ppm  
 F1 15131.28 Hz  
 F2P -0.500 ppm  
 F2 -415.07 Hz  
 PRMCH 10.30000 ppm/Hz  
 HZCM 777.31787 Hz/cm

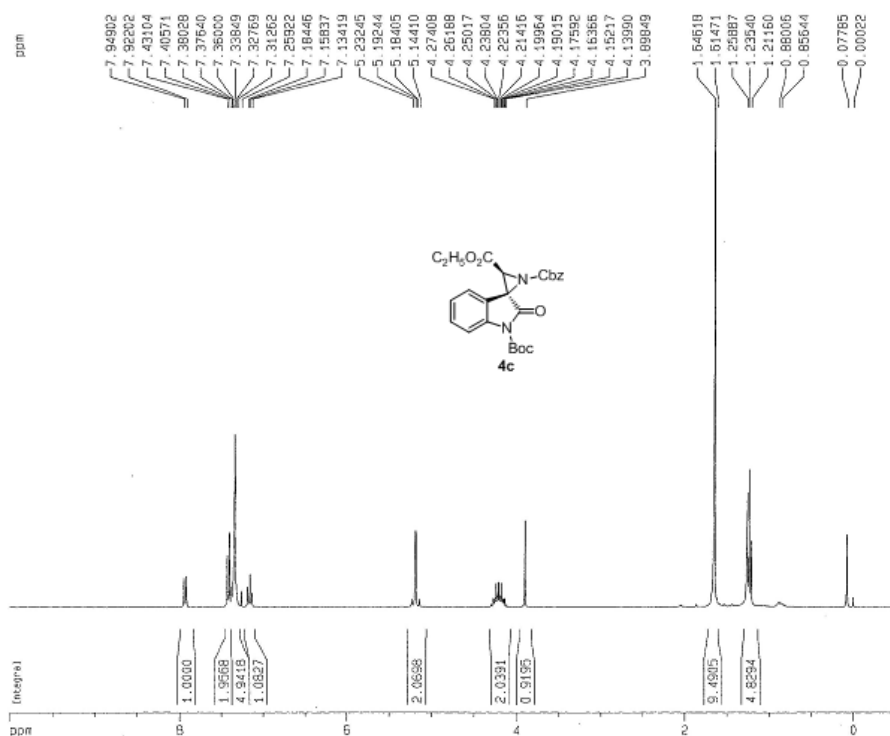

Current Data Parameters  
 NAME 1847-wj-387  
 EXPNO 1  
 PROCNO 1

F2 - Acquisition Parameters  
 Date\_ 2013123  
 Time 14.52  
 INSTRUM av300  
 PROBD 5 mm QNP 1H/13  
 PULPROG zg30  
 TD 32768  
 SOLVENT CDCl3  
 NS 16  
 DS 0  
 SSI 5995.204 Hz  
 FIDRES 0.182959 Hz  
 AD 2.7329011 sec  
 RG 128  
 DW 83.400 usec  
 DE 6.00 usec  
 TE 293.8 K  
 D1 1.00000000 sec  
 MCFEST 0.00000000 sec  
 MCNRK 0.01500000 sec

\*\*\*\*\* CHANNEL f1 \*\*\*\*\*  
 NUC1 1H  
 P1 10.50 usec  
 PL1 0.10 dB  
 SF01 300.1321009 MHz

F2 - Processing parameters  
 SI 32768  
 SF 300.130063 MHz  
 MDK EM  
 SSB 0  
 LB 0.10 Hz  
 GB 0  
 PC 1.00

3D NMR plot parameters  
 CX 20.00 cm  
 CY 15.00 cm  
 F1P 10.000 ppm  
 F1 3001.30 Hz  
 F2P -0.500 ppm  
 F2 -150.05 Hz  
 PRGM 0.32500 ppm/c  
 HZCN 157.56825 Hz/cm

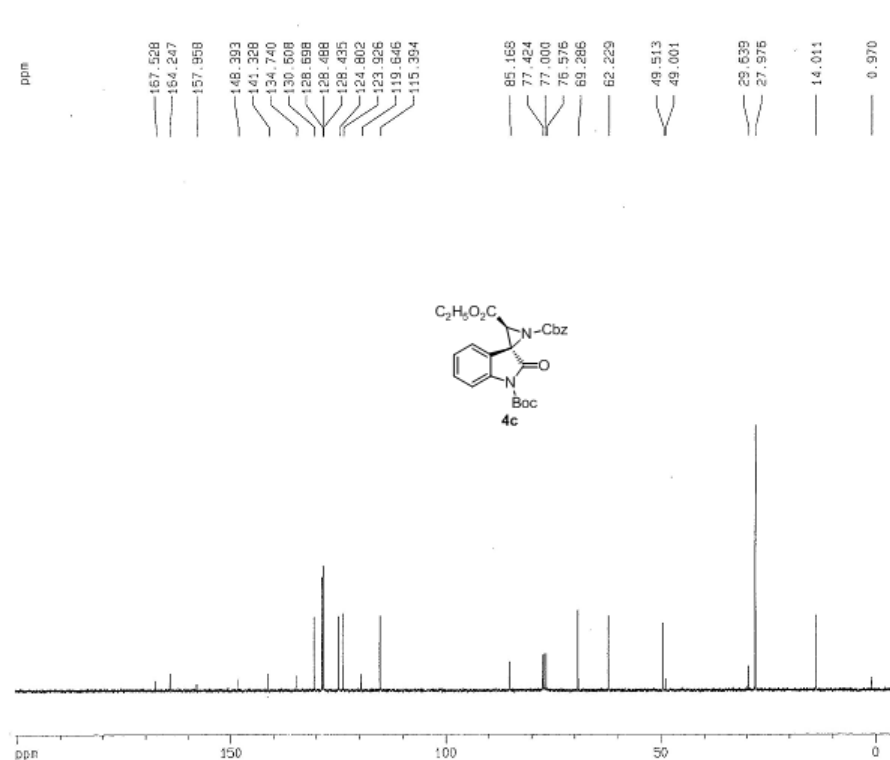

Current Data Parameters  
 NAME 1847-wj-387  
 EXPNO 2  
 PROCNO 1

F2 - Acquisition Parameters  
 Date\_ 20131205  
 Time 9.42  
 INSTRUM av300  
 PROBD 5 mm QNP 1H/13  
 PULPROG zgpg30  
 TD 65536  
 SOLVENT CDCl3  
 NS 160  
 DS 4  
 SSI 22675.736 Hz  
 FIDRES 0.346004 Hz  
 AD 1.445188 sec  
 RG 650  
 DW 22.550 usec  
 DE 6.00 usec  
 TE 293.5 K  
 D1 2.00000000 sec  
 D11 0.03000000 sec  
 DELTA 1.82000000 sec  
 MCFEST 0.00000000 sec  
 MCNRK 0.01500000 sec

\*\*\*\*\* CHANNEL f1 \*\*\*\*\*  
 NUC1 13C  
 P1 10.50 usec  
 PL1 0.10 dB  
 SF01 75.4756238 MHz

\*\*\*\*\* CHANNEL f2 \*\*\*\*\*  
 CPDPRG2 mlt1216  
 NUC2 1H  
 PCPD2 80.00 usec  
 PL2 0.10 dB  
 PL12 17.74 dB  
 PL13 17.74 dB  
 SF02 300.1312005 MHz

F2 - Processing parameters  
 SI 65536  
 SF 75.4677002 MHz  
 MDK EM  
 SSB 0  
 LB 1.00 Hz  
 GB 0  
 PC 1.40

3D NMR plot parameters  
 CX 20.00 cm  
 CY 6.00 cm  
 F1P 200.500 ppm  
 F1 10131.29 Hz  
 F2P -5.500 ppm  
 F2 -415.07 Hz  
 PRGM 10.30000 ppm/c  
 HZCN 777.31759 Hz/cm

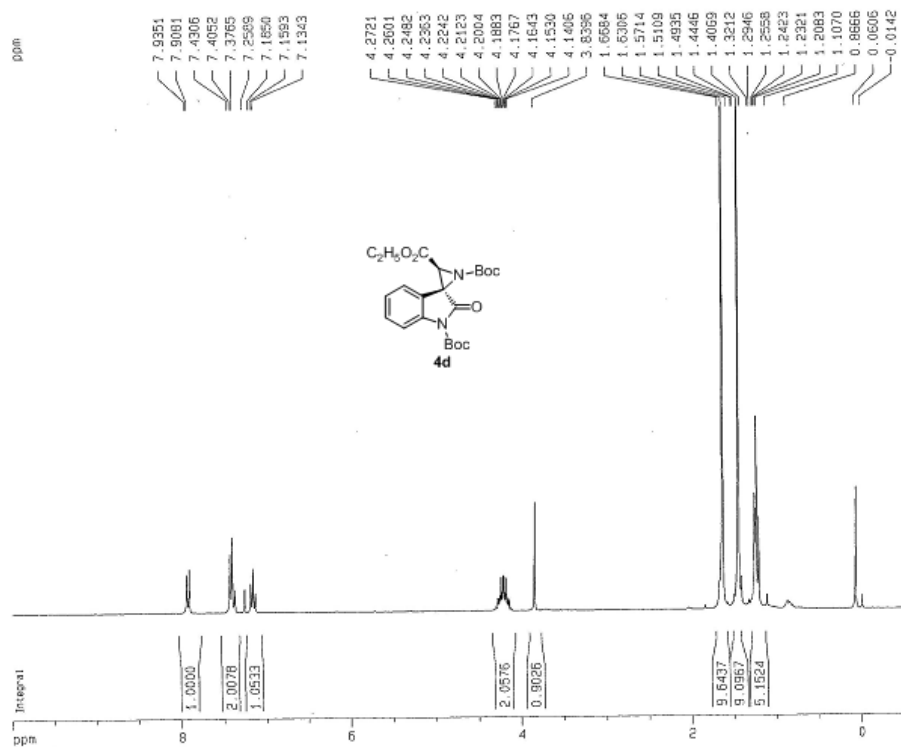

Current Data Parameters  
 NAME 1847-wj-379  
 EXPNO 1  
 PROCNO 1

F2 - Acquisition Parameters  
 Date\_ 2013126  
 Time 15.50  
 INSTRUM av300  
 PROBHD 5 mm QNP 1H/13  
 PULPROG zg30  
 TD 32768  
 SOLVENT CDCl3  
 NS 16  
 DS 0  
 SFO 599.5204 Hz  
 FIDRES 0.182959 Hz  
 AQ 2.7329011 sec  
 RG 128  
 DN 63.400 usec  
 DE 6.00 usec  
 TE 293.5 K  
 D1 1.00000000 sec  
 MCREST 0.00000000 sec  
 MCMK 0.01500000 sec

\*\*\*\*\* CHANNEL f1 \*\*\*\*\*  
 NUC1 1H  
 P1 10.50 usec  
 PL1 0.10 dB  
 SFO1 300.1321009 MHz

F2 - Processing parameters  
 SI 32768  
 SF 300.1300061 MHz  
 NDW EM  
 SSB 0  
 LB 0.10 Hz  
 GB 0  
 PC 1.00

1D NMR plot parameters  
 CX 20.00 cm  
 CY 20.00 cm  
 F1P 10.000 ppm  
 F1 3001.30 Hz  
 F2P -0.500 ppm  
 F2 -150.00 Hz  
 FWHM 0.52500 ppm/c  
 HZCM 157.56825 Hz/c

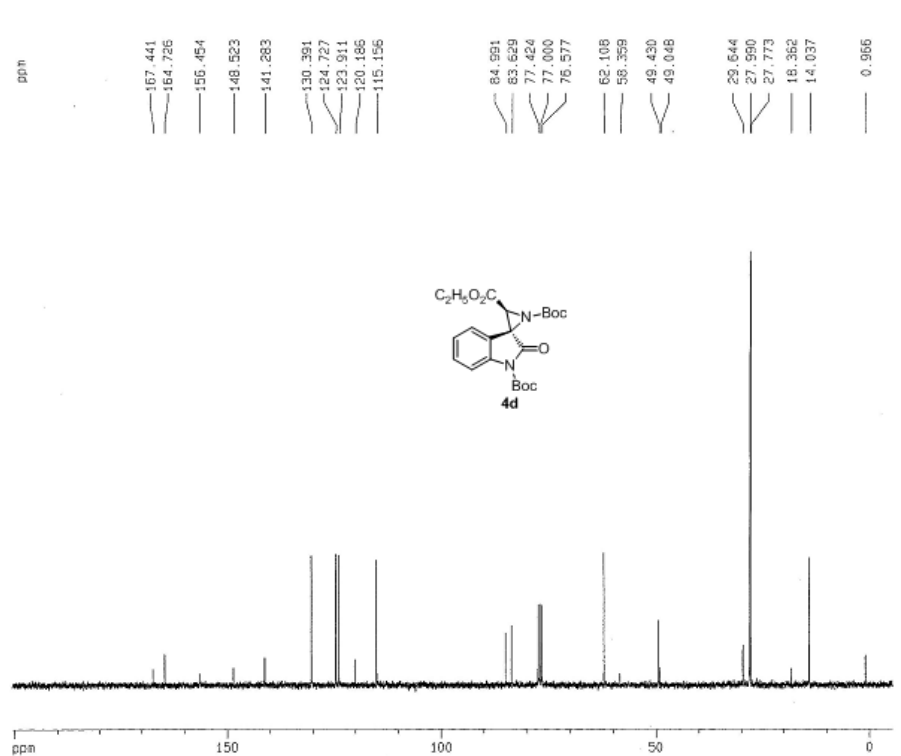

Current Data Parameters  
 NAME 1847-wj-379  
 EXPNO 2  
 PROCNO 1

F2 - Acquisition Parameters  
 Date\_ 2013126  
 Time 17.48  
 INSTRUM av300  
 PROBHD 5 mm QNP 1H/13  
 PULPROG zgpg30  
 TD 65536  
 SOLVENT CDCl3  
 NS 234  
 DS 4  
 SFO 599.5204 Hz  
 FIDRES 0.346204 Hz  
 AQ 1.4451188 sec  
 RG 8192  
 DN 22.450 usec  
 DE 6.00 usec  
 TE 294.6 K  
 D1 2.00000000 sec  
 D11 0.23000000 sec  
 DELTA 1.89990000 sec  
 MCREST 0.00000000 sec  
 MCMK 0.01500000 sec

\*\*\*\*\* CHANNEL f1 \*\*\*\*\*  
 NUC1 13C  
 P1 10.50 usec  
 PL1 -0.81 dB  
 SFO1 75.4750508 MHz

\*\*\*\*\* CHANNEL f2 \*\*\*\*\*  
 CPDPRG2 waltz16  
 NUC2 1H  
 PCPD2 80.00 usec  
 PL2 0.10 dB  
 PL3 17.74 dB  
 PL33 17.74 dB  
 SFO2 300.1312005 MHz

F2 - Processing parameters  
 SI 65536  
 SF 75.4675002 MHz  
 NDW EM  
 SSB 0  
 LB 1.00 Hz  
 GB 0  
 PC 1.40

1D NMR plot parameters  
 CX 20.00 cm  
 CY 30.00 cm  
 F1P 200.500 ppm  
 F1 15131.28 Hz  
 F2P -5.500 ppm  
 F2 -219.07 Hz  
 FWHM 10.38000 ppm/c  
 HZCM 777.31787 Hz/c



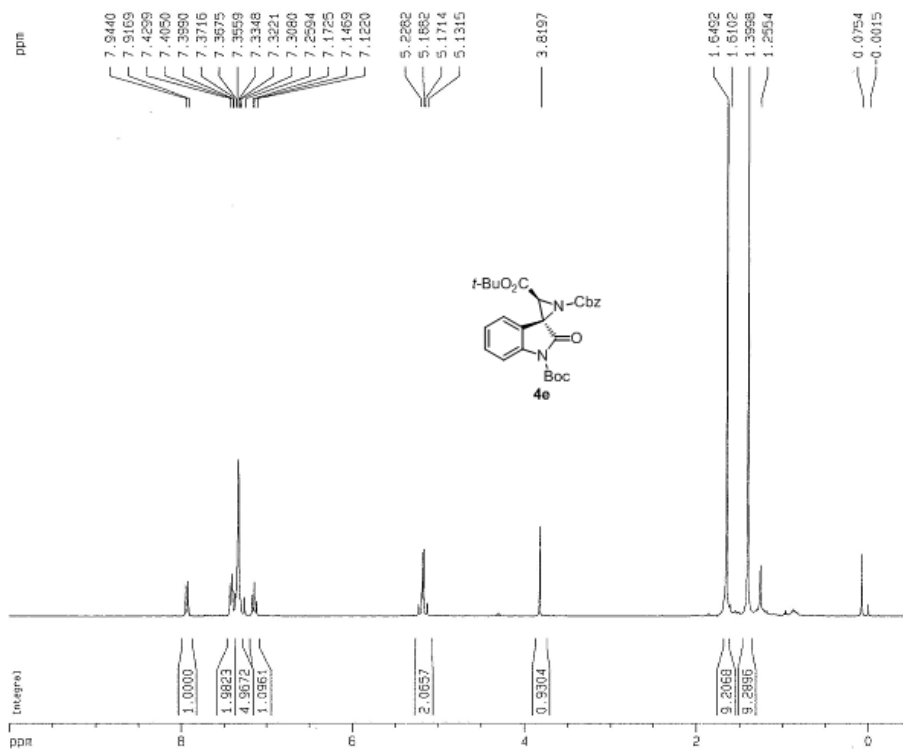

Current Data Parameters  
 NAME 1847-wj1-391  
 EXPNO 1  
 PROCNO 1

F2 - Acquisition Parameters  
 Date\_ 20131203  
 Time 17.04  
 INSTRUM av300  
 PROSHD 5 mm DNP 1H/13  
 PULPROG zg30  
 TD 32768  
 SOLVENT CDCl3  
 NS 16  
 DS 0  
 SFO1 599.624 Hz  
 FIDRES 0.182569 Hz  
 AQ 2.7328011 sec  
 RG 128  
 DN 83.400 user  
 DE 6.00 user  
 TE 293.5 K  
 D1 1.0000000 sec  
 MCREST 0.0000000 sec  
 MCMRK 0.0150000 sec

\*\*\*\*\* CHANNEL f1 \*\*\*\*\*  
 NUC1 1H  
 P1 10.50 user  
 PL1 0.10 dB  
 SFO1 300.1321009 MHz

F2 - Processing parameters  
 SI 32768  
 SF 300.1300051 MHz  
 WDW EM  
 SSB 0  
 LB 0.10 Hz  
 GB 0  
 PC 1.00

1D NMR plot parameters  
 CX 20.00 cm  
 CY 15.00 cm  
 FXP 10.000 ppm  
 F1 300.130 Hz  
 F2P -0.500 ppm  
 F2 -150.06 Hz  
 PPMCM 0.52500 ppm/  
 HZCM 157.56825 Hz/c

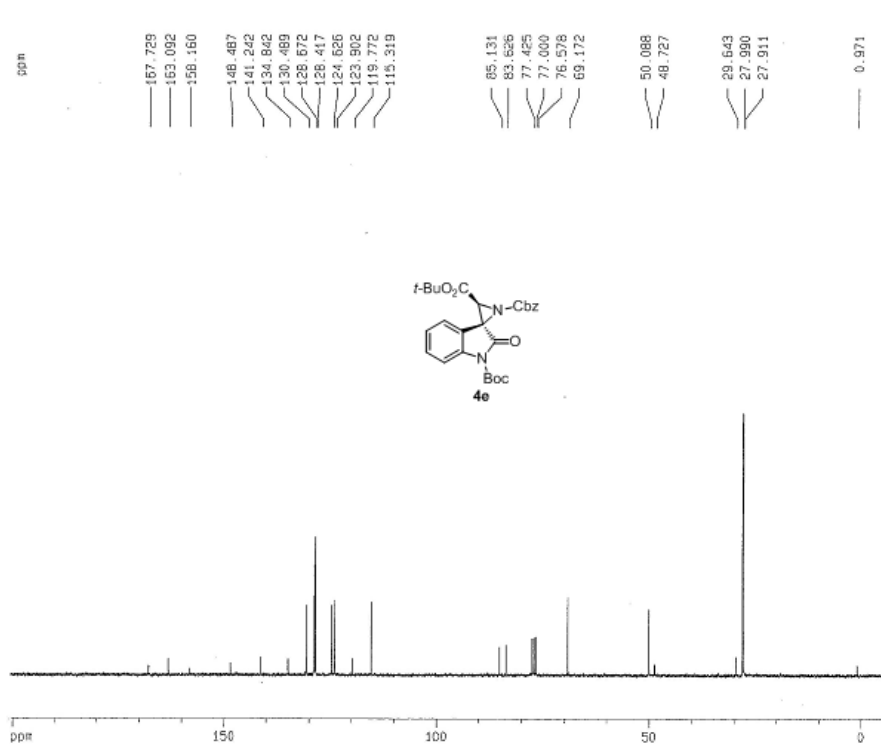

Current Data Parameters  
 NAME 1847-wj1-391  
 EXPNO 2  
 PROCNO 1

F2 - Acquisition Parameters  
 Date\_ 20131205  
 Time 11.03  
 INSTRUM av300  
 PROSHD 5 mm DNP 1H/13  
 PULPROG zgpg30  
 TD 65536  
 SOLVENT CDCl3  
 NS 225  
 DS 4  
 SFO1 200.75735 Hz  
 FIDRES 0.346004 Hz  
 AQ 1.4651988 sec  
 RG 0192  
 DN 22.050 user  
 DE 6.00 user  
 TE 293.6 K  
 D1 2.0000000 sec  
 D11 0.0300000 sec  
 DELTA 1.8959898 sec  
 MCREST 0.0000000 sec  
 MCMRK 0.0150000 sec

\*\*\*\*\* CHANNEL f1 \*\*\*\*\*  
 NUC1 13C  
 P1 10.50 user  
 PL1 -0.81 dB  
 SFO1 75.4779588 MHz

\*\*\*\*\* CHANNEL f2 \*\*\*\*\*  
 CHANNEL2 waltz16  
 NUC2 1H  
 PPRF2 80.00 user  
 PL2 0.10 dB  
 PL12 17.74 dB  
 PL13 17.74 dB  
 SFO2 300.1312015 MHz

F2 - Processing parameters  
 SI 65536  
 SF 75.4677540 MHz  
 WDW EM  
 SSB 0  
 LB 1.00 Hz  
 GB 0  
 PC 1.40

1D NMR plot parameters  
 CX 20.00 cm  
 CY 6.00 cm  
 FXP 200.500 ppm  
 F1 75477.9588 MHz  
 F2P -5.500 ppm  
 F2 -415.07 Hz  
 PPMCM 19.30000 ppm/cm  
 HZCM 777.31792 Hz/cm

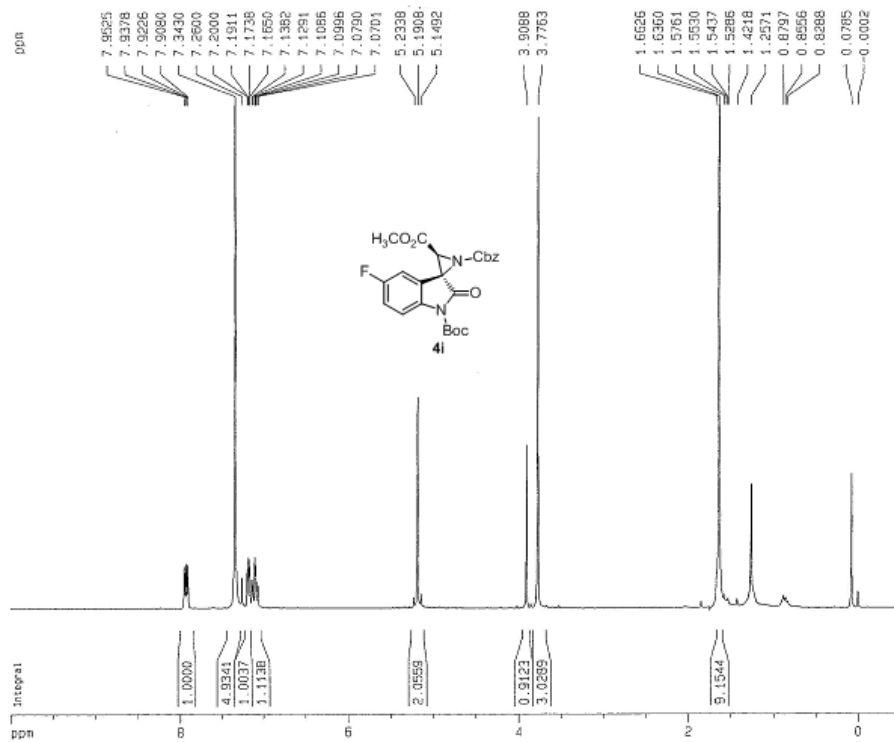

Current Data Parameters  
NAME 1847-wq1-378  
EXPNO 1  
PROCNO 1

F2 - Acquisition Parameters  
Date\_ 20131226  
Time 15.33  
INSTRUM av300  
PROBHD 5 mm QNP 1H/13  
PULPROG zg30  
TD 32768  
SOLVENT CDCl3  
NS 16  
DS 0  
SWH 5995.204 Hz  
FIDRES 0.182959 Hz  
AQ 2.7329011 sec  
RG 128  
DN 83.400 usec  
DE 6.00 usec  
TE 293.2 K  
D1 1.0000000 sec  
WCREST 0.0000000 sec  
MCWK 0.0150000 sec

\*\*\*\*\* CHANNEL f1 \*\*\*\*\*  
NUC1 1H  
P1 10.50 usec  
PL1 0.10 dB  
SFO1 300.1321069 MHz

F2 - Processing parameters  
SI 32768  
SF 300.1300061 MHz  
WDW EM  
SSB 0  
LB 0.10 Hz  
GB 0  
PC 1.00

1D NMR plot parameters  
CX 20.00 cm  
CY 30.00 cm  
F3P 10.000 ppm  
F1 3001.30 Hz  
F2P -0.500 ppm  
F2 -150.06 Hz  
P0MCM 0.52500 ppm/cm  
HZCM 157.58825 Hz/cm

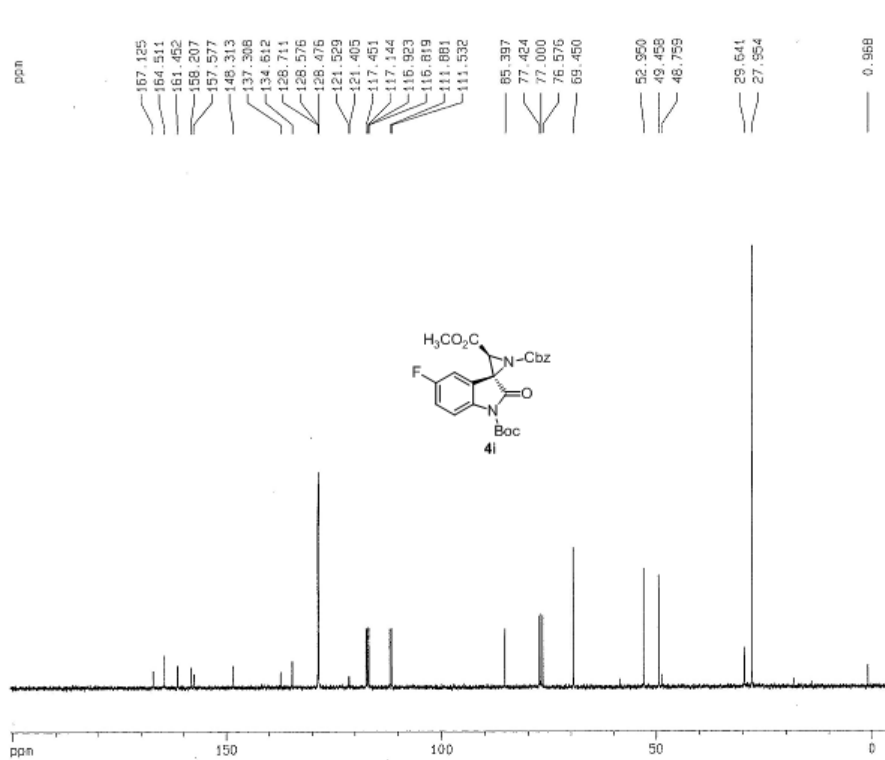

Current Data Parameters  
NAME 1847-wq1-378  
EXPNO 2  
PROCNO 1

F2 - Acquisition Parameters  
Date\_ 20131226  
Time 16.49  
INSTRUM av300  
PROBHD 5 mm QNP 1H/13  
PULPROG zgpg  
TD 65536  
SOLVENT CDCl3  
NS 250  
DS 4  
SWH 22675.736 Hz  
FIDRES 0.346004 Hz  
AQ 1.4451188 sec  
RG 8192  
DN 22.050 usec  
DE 6.50 usec  
TE 294.0 K  
D1 2.0000000 sec  
d11 0.0300000 sec  
DELTA 1.8099998 sec  
WCREST 0.0000000 sec  
MCWK 0.0150000 sec

\*\*\*\*\* CHANNEL f1 \*\*\*\*\*  
NUC1 13C  
P1 10.50 usec  
PL1 -0.81 dB  
SFO1 75.4775950 MHz

\*\*\*\*\* CHANNEL f2 \*\*\*\*\*  
CPDPRG2 waltz16  
NUC2 1H  
PCPD2 80.50 usec  
PL2 2.50 dB  
PL12 17.74 dB  
PL13 17.74 dB  
SFO2 300.1312005 MHz

F2 - Processing parameters  
SI 65536  
SF 75.4677544 MHz  
WDW EM  
SSB 0  
LB 1.00 Hz  
GB 0  
PC 1.40

1D NMR plot parameters  
CX 20.00 cm  
CY 10.00 cm  
F3P 200.500 ppm  
F1 15131.29 Hz  
F2P -5.500 ppm  
F2 -415.07 Hz  
P0MCM 10.30000 ppm/cm  
HZCM 777.31793 Hz/cm

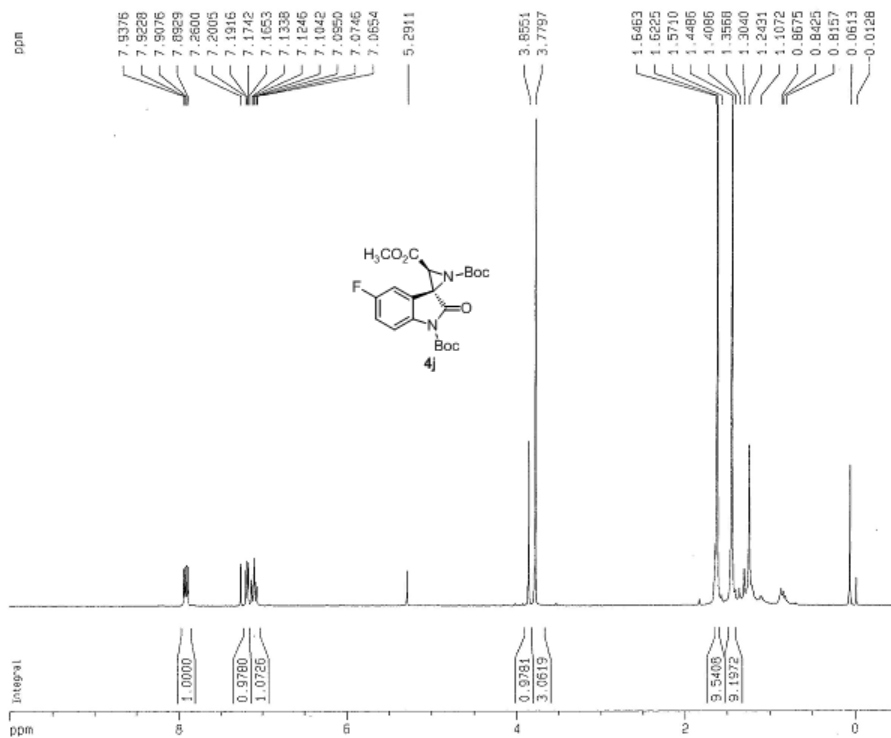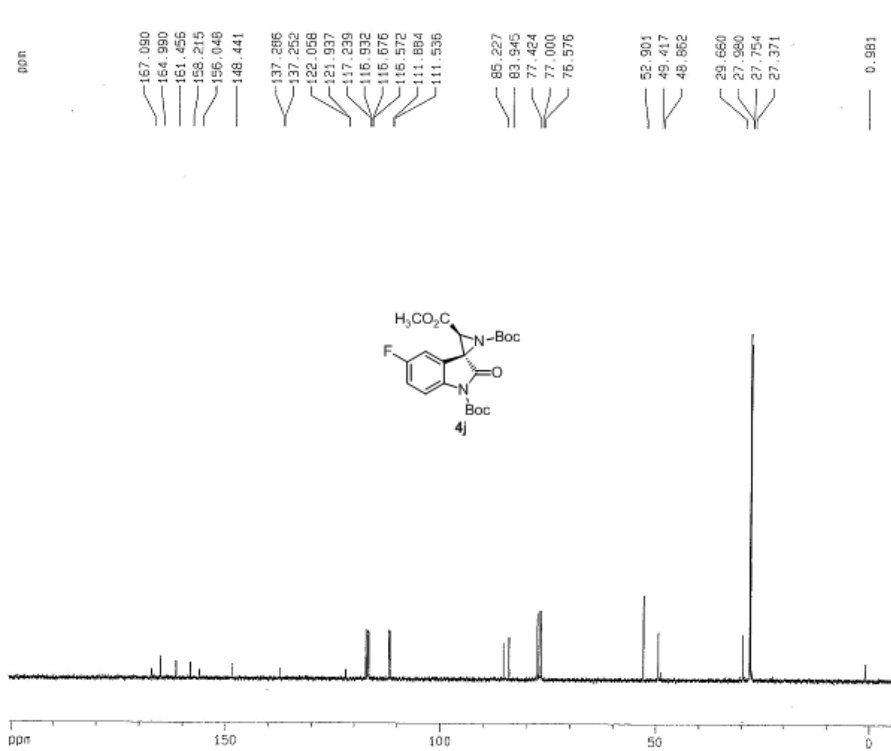

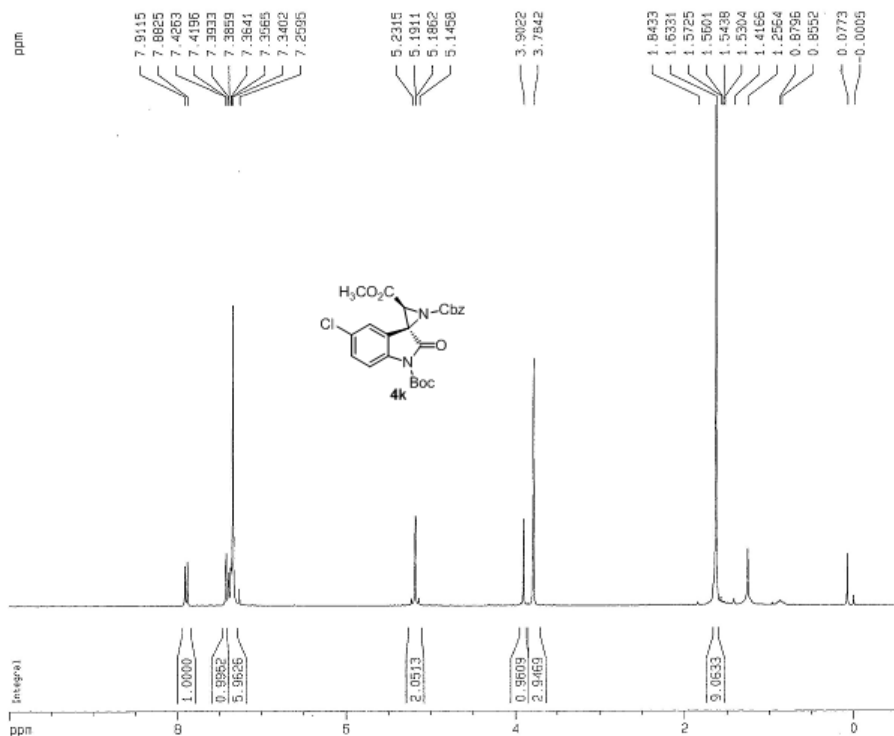

Current Data Parameters  
 NAME 1847-wq1-39a  
 EXPNO 1  
 PROCNO 1

F2 - Acquisition Parameters  
 Date\_ 20131203  
 Time 17.16  
 INSTRUM av300  
 PROBRD 5 mm BNP 1H/13  
 PULPROG zg30  
 TD 32768  
 SOLVENT CDCl3  
 NS 16  
 DS 0  
 SMH 5885.204 Hz  
 FIDRES 0.182959 Hz  
 AQ 2.7329011 sec  
 RG 120  
 DM B3.400 usec  
 DE 6.00 usec  
 TE 293.6 K  
 D1 1.0000000 sec  
 MCREST 0.0000000 sec  
 MCWK 0.0150000 sec

\*\*\*\*\* CHANNEL f1 \*\*\*\*\*  
 NUC1 1H  
 P1 10.50 usec  
 PL1 0.10 dB  
 SFO1 300.1321009 MHz

F2 - Processing parameters  
 SI 32768  
 SF 300.1300061 MHz  
 KCM EM  
 SSB 0  
 LB 0.10 Hz  
 GB 0  
 PC 1.00

1D NMR plot parameters  
 CX 20.00 cm  
 CY 15.00 cm  
 F1P 10.000 ppm  
 F1 3001.30 Hz  
 F2P -0.500 ppm  
 F2 -150.05 Hz  
 PPMCM 0.52500 ppm/  
 HZCM 157.56825 Hz/c

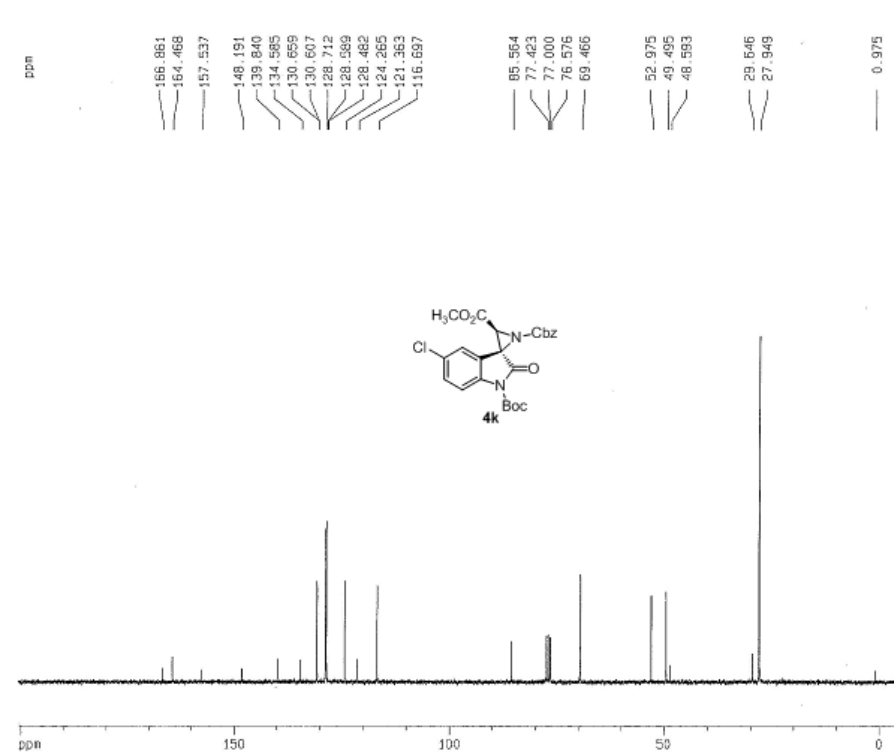

Current Data Parameters  
 NAME 1847-wq1-39a  
 EXPNO 2  
 PROCNO 1

F2 - Acquisition Parameters  
 Date\_ 20131203  
 Time 17.18  
 INSTRUM av300  
 PROBRD 5 mm BNP 1H/13  
 PULPROG zgpg30  
 TD 65536  
 SOLVENT CDCl3  
 NS 203  
 DS 4  
 SMH 28675.735 Hz  
 FIDRES 0.346004 Hz  
 AQ 1.4451185 sec  
 RG 8192  
 DM 22.050 usec  
 DE 6.00 usec  
 TE 290.0 K  
 D1 2.0000000 sec  
 d11 0.0300000 sec  
 DELTA 1.8999998 sec  
 MCREST 0.0000000 sec  
 MCWK 0.0150000 sec

\*\*\*\*\* CHANNEL f1 \*\*\*\*\*  
 NUC1 13C  
 P1 10.50 usec  
 PL1 -0.01 dB  
 SFO1 75.4775588 MHz

\*\*\*\*\* CHANNEL f2 \*\*\*\*\*  
 CPDPRG2 waltz16  
 NUC2 1H  
 PCPD2 80.00 usec  
 PL2 0.10 dB  
 PL12 17.74 dB  
 PL13 17.74 dB  
 SFO2 300.1312005 MHz

F2 - Processing parameters  
 SI 65536  
 SF 75.4677545 MHz  
 KCM EM  
 SSB 0  
 LB 1.00 Hz  
 GB 0  
 PC 1.40

1D NMR plot parameters  
 CX 20.00 cm  
 CY 8.00 cm  
 F1P 200.500 ppm  
 F1 15131.28 Hz  
 F2P -5.500 ppm  
 F2 -415.07 Hz  
 PPMCM 10.30000 ppm/  
 HZCM 777.31793 Hz/c

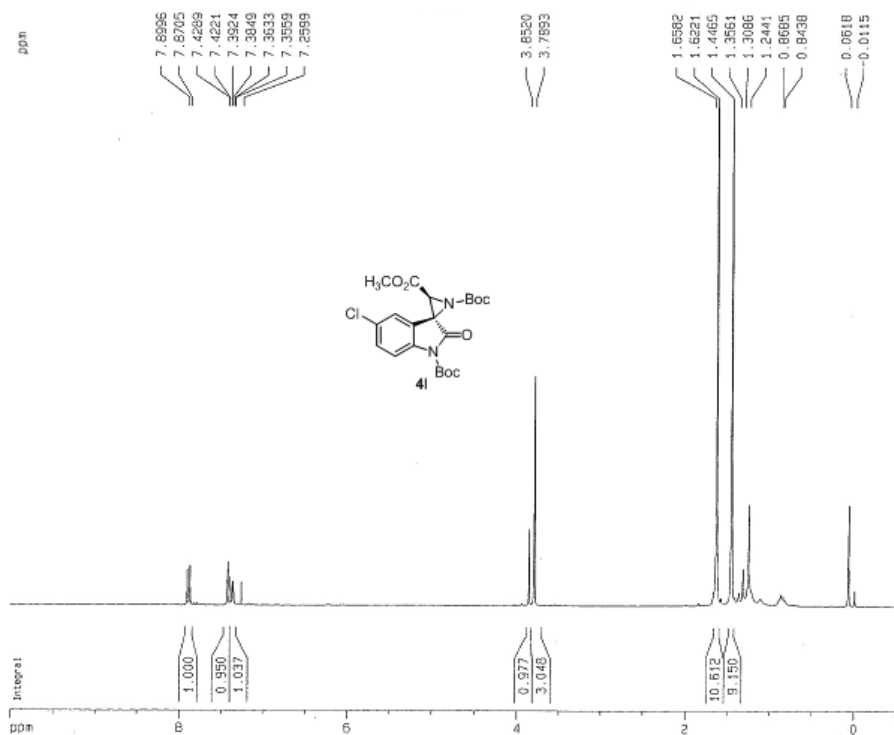

Current Data Parameters  
 NAME 1847-wj-390  
 EXPNO 1  
 PROCNO 1

F2 - Acquisition Parameters  
 Date\_ 20131203  
 Time 17.01  
 INSTRUM av300  
 PROBHD 5 mm QNP 1H/13  
 PULPROG zg30  
 TD 32768  
 SOLVENT CDCl3  
 NS 16  
 DS 0  
 SMH 5995.204 Hz  
 FIDRES 0.182959 Hz  
 AQ 2.7329011 sec  
 RG 128  
 DN 83.400 usec  
 DE 6.00 usec  
 TE 293.6 K  
 D1 1.0000000 sec  
 MCREST 0.0000000 sec  
 MDWRK 0.01500000 sec

\*\*\*\*\* CHANNEL f1 \*\*\*\*\*  
 NUC1 1H  
 P1 10.50 usec  
 PL1 0.10 dB  
 SFO1 300.1321009 MHz

F2 - Processing parameters  
 SI 32768  
 SF 300.1300051 MHz  
 WMW EN  
 SSB 0  
 LB 0.10 Hz  
 GB 0  
 PC 1.00

1D NMR plot parameters  
 CX 20.00 cm  
 CY 15.00 cm  
 F1P 10.000 ppm  
 F1 3001.30 Hz  
 F2P -0.500 ppm  
 F2 -150.06 Hz  
 PPMCM 0.52500 ppm/s  
 HZCM 157.58825 Hz/ci

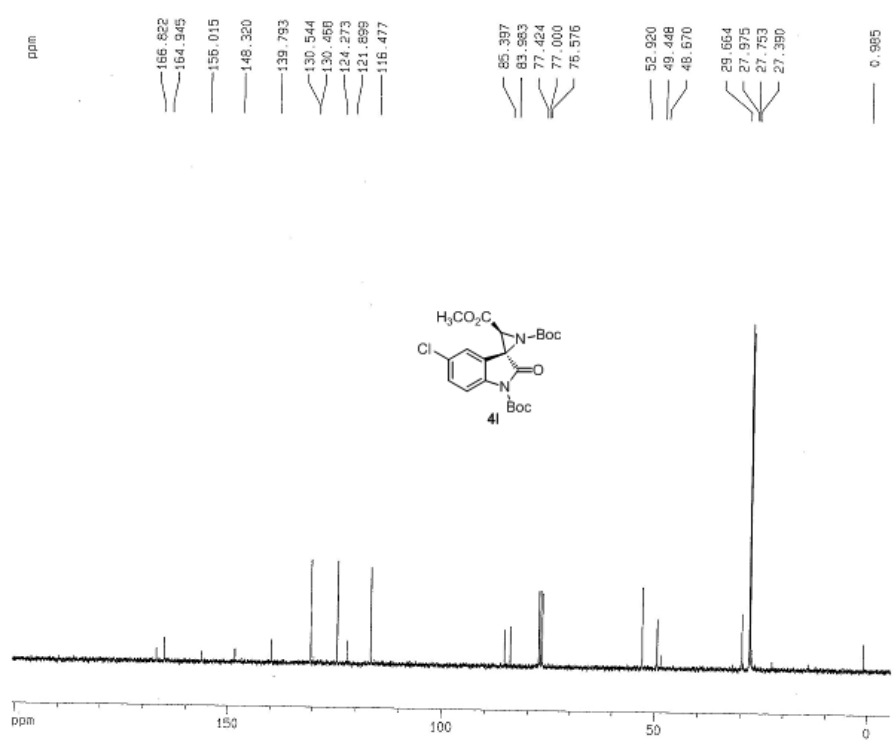

Current Data Parameters  
 NAME 1847-wj-390  
 EXPNO 2  
 PROCNO 1

F2 - Acquisition Parameters  
 Date\_ 20131211  
 Time 10.59  
 INSTRUM av300  
 PROBHD 5 mm QNP 1H/13  
 PULPROG zgpg  
 TD 65536  
 SOLVENT CDCl3  
 NS 256  
 DS 4  
 SMH 20675.736 Hz  
 FIDRES 0.349004 Hz  
 AQ 1.4451188 sec  
 RG 8192  
 DN 22.000 usec  
 DE 6.00 usec  
 TE 293.3 K  
 D1 2.0000000 sec  
 D11 0.0300000 sec  
 DELTA 1.8999998 sec  
 MCREST 0.2000000 sec  
 MDWRK 0.01500000 sec

\*\*\*\*\* CHANNEL f1 \*\*\*\*\*  
 NUC1 13C  
 P1 10.50 usec  
 PL1 -0.81 dB  
 SFO1 75.4775528 MHz

\*\*\*\*\* CHANNEL f2 \*\*\*\*\*  
 CPDPRG2 waltz16  
 NUC2 1H  
 PCPD2 80.00 usec  
 PL2 0.10 dB  
 PL32 17.74 dB  
 PL13 17.74 dB  
 SFO2 300.1312020 MHz

F2 - Processing parameters  
 SI 65536  
 SF 75.4675265 MHz  
 WMW EN  
 SSB 0  
 LB 1.00 Hz  
 GB 0  
 PC 1.40

1D NMR plot parameters  
 CX 20.00 cm  
 CY 8.00 cm  
 F1P 200.500 ppm  
 F1 35131.28 Hz  
 F2P -5.500 ppm  
 F2 -410.07 Hz  
 PPMCM 10.30000 ppm/s  
 HZCM 277.31020 Hz/ci

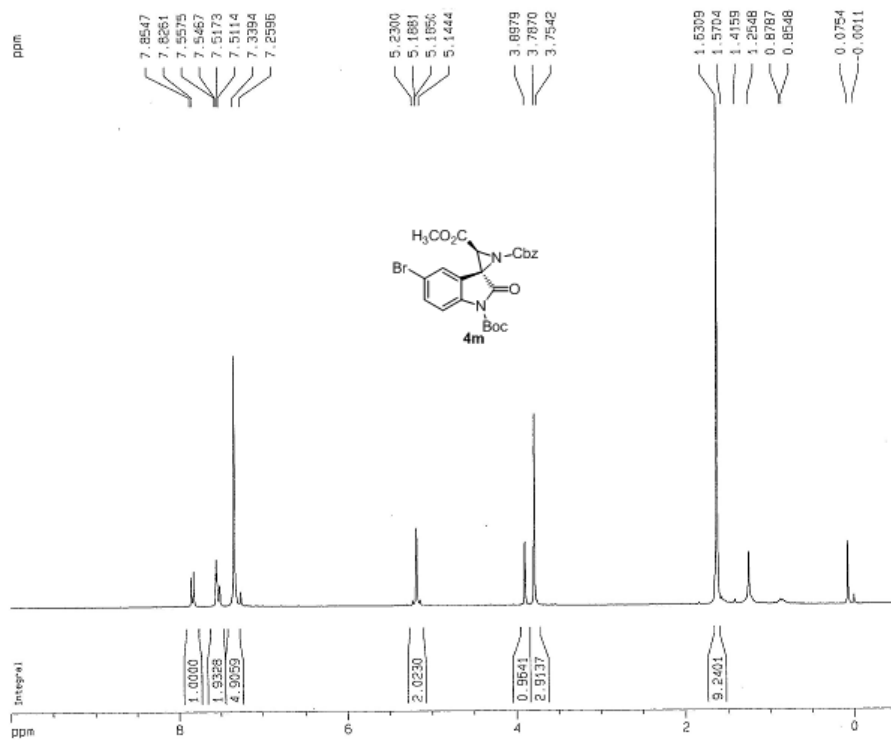

Current Data Parameters  
 NAME 1847-wj-380  
 EXPNO 1  
 PROCNO 1

F2 - Acquisition Parameters  
 Date\_ 20131127  
 Time 11.31  
 INSTRUM av360  
 PROBRD 5 mm QNP 1H/13  
 PULPROG zgpg  
 TD 32768  
 SOLVENT CDCl3  
 NS 16  
 DS 0  
 SWH 5995.204 Hz  
 FIDRES 0.182959 Hz  
 AQ 2.732011 sec  
 RG 128  
 CW 83.400 usec  
 DE 6.00 usec  
 TE 293.7 K  
 D1 1.00000000 sec  
 MCREST 0.00000000 sec  
 MCWTK 0.01500000 sec

\*\*\*\*\* CHANNEL f1 \*\*\*\*\*  
 NUC1 1H  
 P1 10.50 usec  
 PL1 0.10 dB  
 SFO1 300.1321009 MHz

F2 - Processing parameters  
 S1 32768  
 SF 300.1300653 MHz  
 WDW EM  
 SSB 0  
 LB 0.10 Hz  
 GB 0  
 PC 1.00

1D NMR plot parameters  
 CX 20.00 cm  
 CY 12.00 cm  
 F1P 10.000 ppm  
 F1 3001.30 Hz  
 F2P -0.500 ppm  
 F2 -150.05 Hz  
 PPMCM 0.52500 ppm  
 HZCM 157.36825 Hz

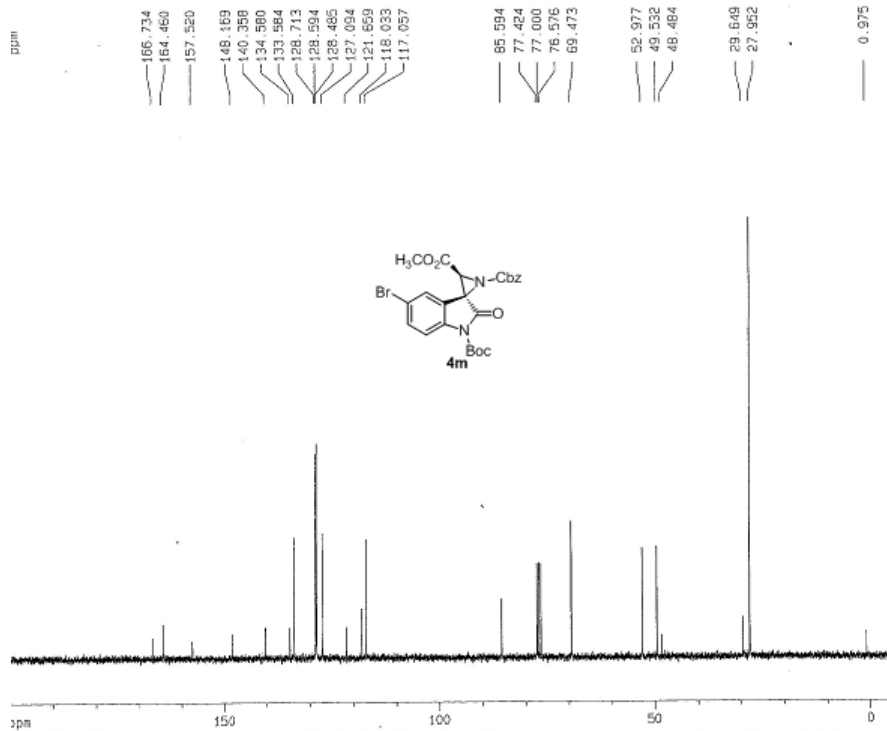

Current Data Parameters  
 NAME 1847-wj-380  
 EXPNO 2  
 PROCNO 1

F2 - Acquisition Parameters  
 Date\_ 20131129  
 Time 9.30  
 INSTRUM av360  
 PROBRD 5 mm QNP 1H/13  
 PULPROG zgpg  
 TD 65536  
 SOLVENT CDCl3  
 NS 133  
 DS 4  
 SWH 23075.736 Hz  
 FIDRES 0.346204 Hz  
 AQ 1.4451188 sec  
 RG 8192  
 CW 22.050 usec  
 DE 6.00 usec  
 TE 293.9 K  
 D1 2.00000000 sec  
 D11 0.03000000 sec  
 DELTA 1.88999990 sec  
 MCREST 0.00000000 sec  
 MCWTK 0.01500000 sec

\*\*\*\*\* CHANNEL f1 \*\*\*\*\*  
 NUC1 13C  
 P1 10.50 usec  
 PL1 -0.81 dB  
 SFO1 75.4775958 MHz

\*\*\*\*\* CHANNEL f2 \*\*\*\*\*  
 CDPF02 hstz16  
 NUC2 1H  
 PPR02 80.10 usec  
 PL2 0.10 dB  
 PL12 17.74 dB  
 PL13 17.74 dB  
 SFO2 300.1312026 MHz

F2 - Processing parameters  
 S1 65536  
 SF 75.4677544 MHz  
 WDW EM  
 SSB 0  
 LB 1.00 Hz  
 GB 0  
 PC 1.40

1D NMR plot parameters  
 CX 20.00 cm  
 CY 10.00 cm  
 F1P 200.500 ppm  
 F1 15131.29 Hz  
 F2P -5.500 ppm  
 F2 -415.07 Hz  
 PPMCM 10.20000 ppm  
 HZCM 777.31783 Hz

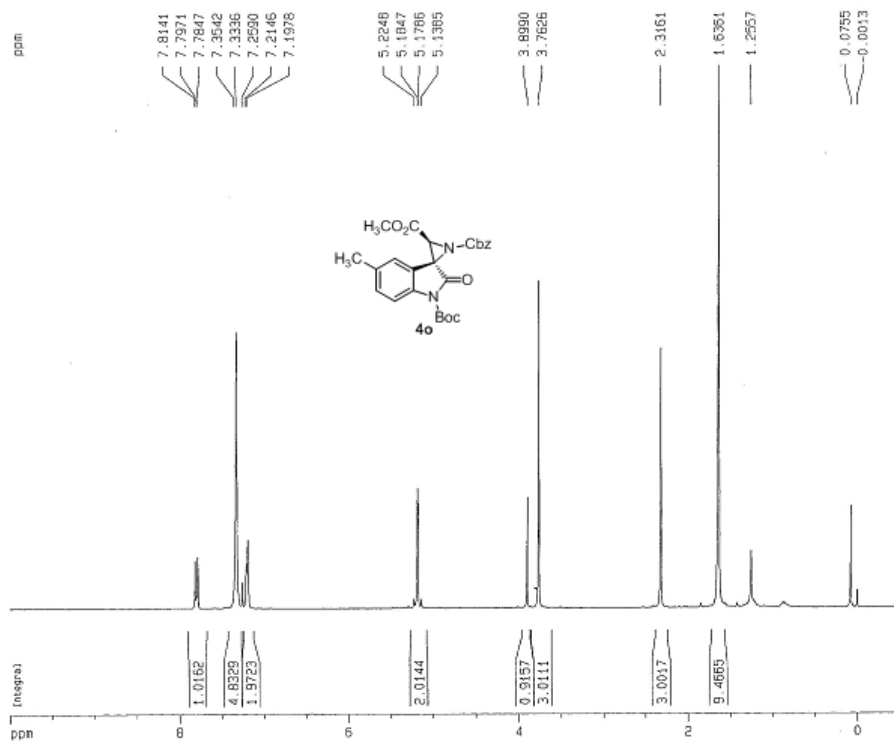

Current Data Parameters  
 NAME 1047-wg1-377  
 EXPNO 1  
 PROCNO 1

F2 - Acquisition Parameters  
 Date\_ 20131126  
 Time 15.43  
 INSTRUM av300  
 PROSHO 5 mm QNP 1H/13  
 PULPROG zg30  
 TD 32768  
 SOLVENT CDCl3  
 NS 16  
 DS 0  
 SMH 5995.204 Hz  
 FIDRES 0.182959 Hz  
 AQ 2.7329911 sec  
 RG 128  
 DM 83.480 usec  
 DE 6.00 usec  
 TE 293.5 K  
 D1 1.00000000 sec  
 MCREST 0.00000000 sec  
 MCWK 0.01500000 sec

\*\*\*\*\* CHANNEL f1 \*\*\*\*\*  
 NUC1 1H  
 P1 10.50 usec  
 PL1 0.10 dB  
 SFO1 300.1321009 MHz

F2 - Processing parameters  
 SI 32768  
 SF 300.1300051 MHz  
 WDW EM  
 SSB 0  
 LB 0.10 Hz  
 GB 0  
 PC 1.00

3D NMR plot parameters  
 CX 20.00 cm  
 CY 20.00 cm  
 FJP 10.000 ppm  
 F1 3001.30 Hz  
 F2P -0.500 ppm  
 F2 -150.06 Hz  
 PRMCM 0.52500 ppm/c  
 HZCM 157.56825 Hz/c

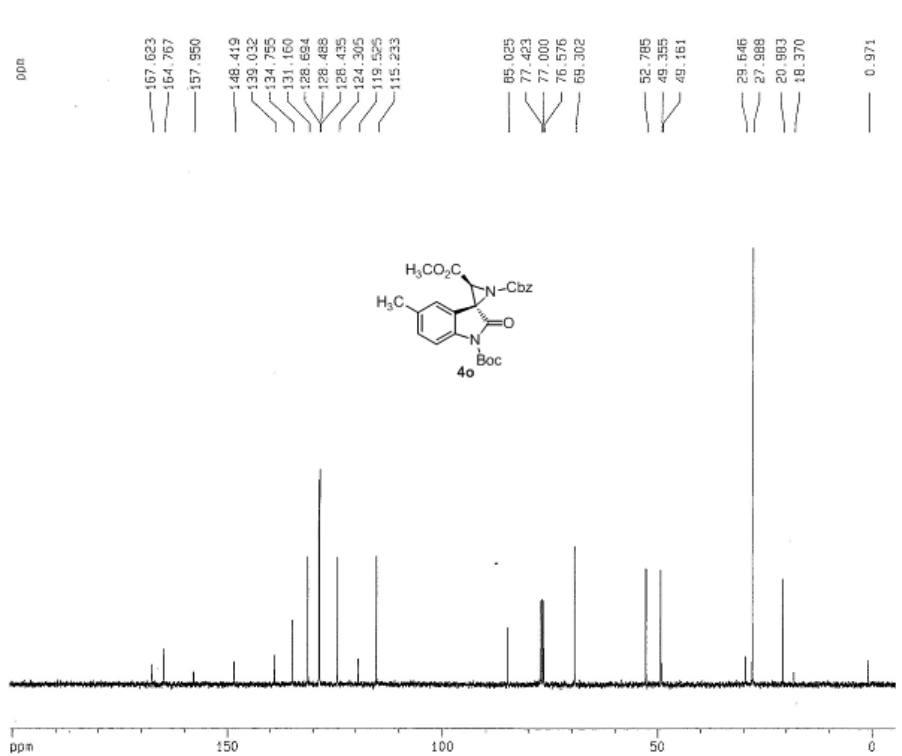

Current Data Parameters  
 NAME 1047-wg1-377  
 EXPNO 2  
 PROCNO 1

F2 - Acquisition Parameters  
 Date\_ 20131128  
 Time 17.12  
 INSTRUM av300  
 PROSHO 5 mm QNP 1H/13  
 PULPROG zgpg30  
 TD 65536  
 SOLVENT CDCl3  
 NS 256  
 DS 4  
 SMH 22675.736 Hz  
 FIDRES 0.346004 Hz  
 AQ 1.4451188 sec  
 RG 612  
 DM 22.650 usec  
 DE 6.00 usec  
 TE 294.1 K  
 D1 2.00000000 sec  
 d11 0.02000000 sec  
 DELTA 1.89999999 sec  
 MCREST 0.02000000 sec  
 MCWK 0.01500000 sec

\*\*\*\*\* CHANNEL f1 \*\*\*\*\*  
 NUC1 13C  
 P1 10.50 usec  
 PL1 -0.01 dB  
 SFO1 75.4775698 MHz

\*\*\*\*\* CHANNEL f2 \*\*\*\*\*  
 NUC2 1H  
 P2 80.00 usec  
 PL2 0.10 dB  
 PL12 17.74 dB  
 PL13 17.74 dB  
 SFO2 300.1312005 MHz

F2 - Processing parameters  
 SI 65536  
 SF 75.4677541 MHz  
 WDW EM  
 SSB 0  
 LB 1.00 Hz  
 GB 0  
 PC 1.40

3D NMR plot parameters  
 CX 20.00 cm  
 CY 10.00 cm  
 FJP 200.500 ppm  
 F1 10131.28 Hz  
 F2P -0.500 ppm  
 F2 -415.07 Hz  
 PRMCM 10.30000 ppm/c  
 HZCM 777.31787 Hz/cm

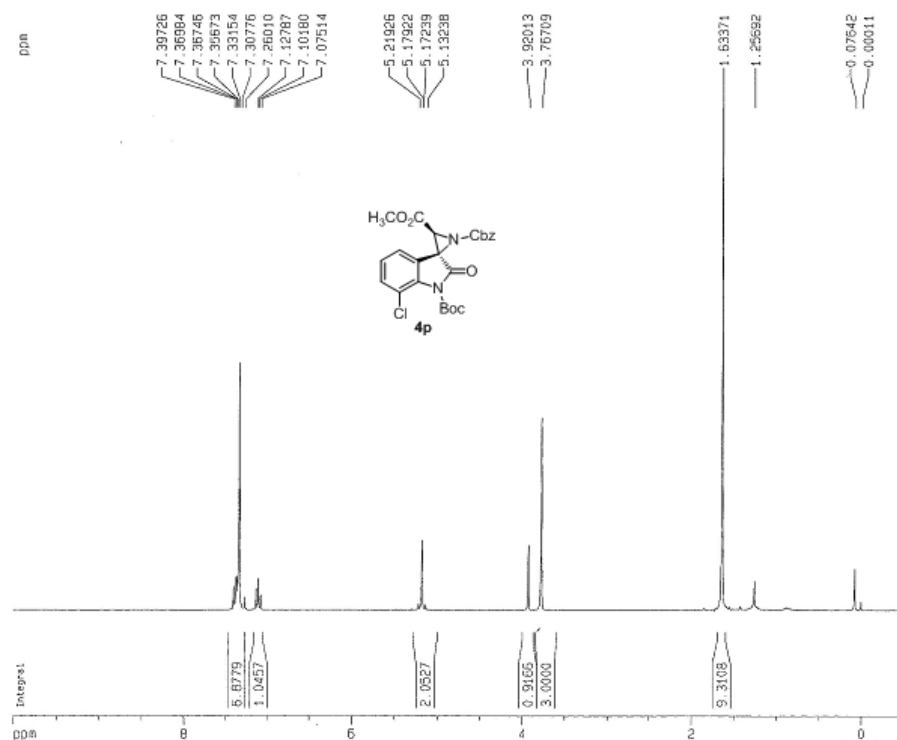

Current Data Parameters  
 NAME 1847-wj-384  
 EXPNO 1  
 PROCNO 1

F2 - Acquisition Parameters  
 Date\_ 2013128  
 Time 10.41  
 INSTRUM av300  
 PROBHD 5 mm QNP 1H/13  
 PULPROG zg30  
 TD 32768  
 SOLVENT CDCl3  
 NS 16  
 DS 0  
 SWH 5895.204 Hz  
 FIDRES 0.182959 Hz  
 AQ 2.7329911 sec  
 RG 128  
 DW 83.400 usec  
 DE 6.00 usec  
 TE 293.4 K  
 D1 1.00000000 sec  
 MCREST 0.00000000 sec  
 MCNRC 0.01500000 sec

\*\*\*\*\* CHANNEL f1 \*\*\*\*\*  
 NUC1 1H  
 P1 10.50 usec  
 PL1 0.10 dB  
 SFO1 300.1321009 MHz

F2 - Processing parameters  
 SI 32768  
 SF 300.1300008 MHz  
 MDW EM  
 SSB 0  
 LB 0.10 Hz  
 GB 0  
 PC 1.00

1D NMR plot parameters  
 CX 20.00 cm  
 CY 12.00 cm  
 FJP 10.000 ppm  
 F1 3001.30 Hz  
 F2P -0.500 ppm  
 F2 -150.06 Hz  
 PRMCH 0.32900 ppm/c  
 HZCH 157.56825 Hz/cx

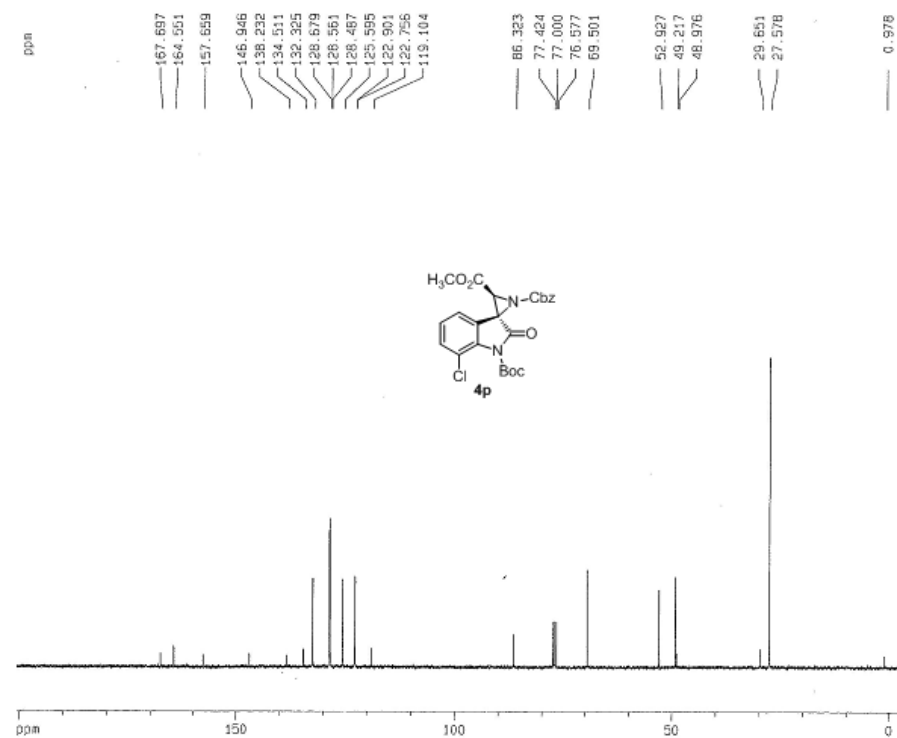

Current Data Parameters  
 NAME 1847-wj-384  
 EXPNO 2  
 PROCNO 1

F2 - Acquisition Parameters  
 Date\_ 2013128  
 Time 10.45  
 INSTRUM av300  
 PROBHD 5 mm QNP 1H/13  
 PULPROG zgpg30  
 TD 65536  
 SOLVENT CDCl3  
 NS 256  
 DS 4  
 SWH 22675.736 Hz  
 FIDRES 0.346004 Hz  
 AQ 1.4451183 sec  
 RG 128  
 DW 22.050 usec  
 DE 6.00 usec  
 TE 293.5 K  
 D1 2.05000000 sec  
 s11 0.03000000 sec  
 DELTA 1.89999999 sec  
 MCREST 0.02000000 sec  
 MCNRC 0.01500000 sec

\*\*\*\*\* CHANNEL f1 \*\*\*\*\*  
 NUC1 13C  
 P1 10.50 usec  
 PL1 -0.81 dB  
 SFO1 75.4756580 MHz

\*\*\*\*\* CHANNEL f2 \*\*\*\*\*  
 DP0PRG2 waltz16  
 NUC2 1H  
 PCPO2 80.00 usec  
 PL2 0.10 dB  
 PL12 17.74 dB  
 PL13 17.74 dB  
 SFO2 300.1312605 MHz

F2 - Processing parameters  
 SI 65536  
 SF 75.4677543 MHz  
 MDW EM  
 SSB 0  
 LB 1.00 Hz  
 GB 0  
 PC 1.00

1D NMR plot parameters  
 CX 20.00 cm  
 CY 7.00 cm  
 FJP 200.500 ppm  
 F1 15131.28 Hz  
 F2P -5.500 ppm  
 F2 -415.07 Hz  
 PRMCH 10.30000 ppm/c  
 HZCH 777.31787 Hz/cx
